# Supplementary material for: Zinc catalysed electrophilic C–H borylation of heteroarenes
Source: PubMed Central journal article supplement (PMC8208323; doi:10.1039/d1sc01883c), 2021-05-13
Supplement: SC-012-D1SC01883C-s001.pdf [file SC-012-D1SC01883C-s001.pdf]

## Zinc catalysed electrophilic C-H borylation of heteroarenes

M. E. Grundy, K. Yuan, G. S. Nichol, M. J. Ingleson\*

*University of Edinburgh, Joseph Black Building, David Brewster Road, Edinburgh, EH9 3FJ*

### Table of Contents

|                                                                                                                              |     |
|------------------------------------------------------------------------------------------------------------------------------|-----|
| S1. General information .....                                                                                                | 2   |
| S2. Synthesis of novel NHC-Zinc species .....                                                                                | 3   |
| S3. Catalytic C-H Borylation .....                                                                                           | 5   |
| S4. Investigation of potential “trojan horse” catalysts.....                                                                 | 33  |
| S5. Metathesis studies.....                                                                                                  | 37  |
| S6. [IDippZnEt][B(C <sub>6</sub> F <sub>5</sub> ) <sub>4</sub> ] / DMT study.....                                            | 48  |
| S7. [IDippZnC <sub>6</sub> F <sub>5</sub> ][B(C <sub>6</sub> F <sub>5</sub> ) <sub>4</sub> ] / HBPIn interaction study ..... | 52  |
| S8. 7DippZnH(NTf <sub>2</sub> ) DBPIn H/D exchange study .....                                                               | 58  |
| S10. Et <sub>3</sub> PO competition experimentation.....                                                                     | 62  |
| S11. Hydride affinity competition experimentation .....                                                                      | 64  |
| S12. Isolation of borenium species [IDippBPIn][NTf <sub>2</sub> ] .....                                                      | 66  |
| S13. X-Ray Crystallography .....                                                                                             | 67  |
| S14. DFT calculations.....                                                                                                   | 73  |
| S15. Copies of NMR spectra for new compounds .....                                                                           | 118 |
| S16. References.....                                                                                                         | 121 |

## S1. General information

Unless otherwise stated, all the experiments were carried out under an inert atmosphere using either standard Schlenk techniques or in a MBraun glovebox (< 0.1 ppm H<sub>2</sub>O / O<sub>2</sub>). Chlorobenzene, d<sub>6</sub>-benzene and d<sub>5</sub>-bromobenzene were distilled over CaH<sub>2</sub> and stored over 3 Å molecular sieves. All other solvents were obtained from an Inert PureSolv MD5 SPS. Unless otherwise stated all chemicals were purchased from commercial sources and used as received. Trityl tetrakis(pentafluorophenyl)borate,<sup>1</sup> N,N-bis(2,6-diisopropylphenyl)imidazol-2-ylidene (IDipp),<sup>2</sup> 1,3-bis(2,6-diisopropylphenyl)-4,5,6,7-tetrahydro-1*H*-1,3-diazepin-3-ium-2-ide (7Dipp),<sup>3</sup> 7DippZnPh<sub>2</sub>,<sup>4</sup> 7DippZnPh(NTf<sub>2</sub>),<sup>4</sup> 7DippZnH(NTf<sub>2</sub>),<sup>4</sup> IDippZnPh<sub>2</sub>,<sup>4</sup> IDippZnPh(NTf<sub>2</sub>),<sup>4</sup> IDippZnEt<sub>2</sub>,<sup>5</sup> [IDippZnEt][B(C<sub>6</sub>F<sub>5</sub>)<sub>4</sub>],<sup>6</sup> [IDippZnC<sub>6</sub>F<sub>5</sub>][B(C<sub>6</sub>F<sub>5</sub>)<sub>4</sub>],<sup>6</sup> 5-methoxy-N-benzylindole,<sup>7</sup> 5-methyl-N-benzylindole,<sup>7</sup> 5-fluoro-N-benzylindole,<sup>8</sup> 6-chloro-N-benzylindole<sup>9</sup> and 6-chloro-N-methylindole<sup>10</sup> were prepared according to reported literature procedures.

<sup>1</sup>H, <sup>2</sup>H, <sup>13</sup>C{<sup>1</sup>H}, <sup>11</sup>B, <sup>11</sup>B, and <sup>19</sup>F NMR spectra were recorded on Bruker Avance III 400, Bruker Avance III 500MHz or Bruker PRO 500 MHz spectrometers. Chemical shifts are reported as dimensionless  $\delta$  values and are frequency referenced relative to residual protio-solvent signals in the NMR solvents for <sup>1</sup>H and <sup>13</sup>C{<sup>1</sup>H}, while <sup>11</sup>B and <sup>19</sup>F shifts are referenced relative to external BF<sub>3</sub>•Et<sub>2</sub>O and hexafluorobenzene, respectively. Coupling constants *J* are given in Hertz (Hz) as positive values regardless of their real individual signs. Unless otherwise stated NMR spectroscopy was undertaken at room temperature (~20 °C). The multiplicity of the signals are indicated as “s”, “d”, “t”, “q”, “pent”, “sept” or “m” for singlet, doublet, triplet, quartet, pentet, septet or multiplet, respectively. Mass spectrometry was performed by the University of Edinburgh, School of Chemistry, Mass spectrometry Laboratory using electrospray ionisation.

It should be noted that the very broad signals observed at ca. 0 ppm in the <sup>11</sup>B NMR spectra are due to the use of borosilicate glass NMR tubes and boron containing parts in the NMR cavity. These are not coincident with the broad compound signals.

## S2. Synthesis of novel NHC-Zinc species

### 7DippZnEt<sub>2</sub>

ZnEt<sub>2</sub> (0.72 mL, 1 M in hexanes, 0.72 mmol) was dissolved in toluene (5 mL), A solution of 7Dipp (300 mg, 0.720 mmol) in toluene (8 mL) was added dropwise. Volatiles were then removed *in vacuo* resulting in the isolation of the product 7DippZnEt<sub>2</sub> as an off-white powder. Yield: (325 mg, 0.600 mmol, 83%). Crystals suitable for X-ray crystallography were grown from a concentrated toluene solution stored at -30°C.

**<sup>1</sup>H NMR** (500 MHz, C<sub>6</sub>D<sub>6</sub>) δ 7.20 – 7.07 (m, 6H), 3.48 (br s, 3.3 Hz, 4H), 3.37 (sept, J = 6.9 Hz, 4H), 1.71 (br s, 4H), 1.50 (d, J = 6.8 Hz, 12H), 1.30 (t, J = 8.0 Hz, 6H), 1.13 (d, J = 6.9 Hz, 12H), -0.31 (q, J = 8.1 Hz, 4H).

**<sup>13</sup>C{<sup>1</sup>H} NMR** (126 MHz, C<sub>6</sub>D<sub>6</sub>) δ 145.15, 144.47, 128.92, 125.10, 55.84, 28.78, 26.56, 25.59, 23.76, 14.24, 5.85. (N<sub>2</sub> not detected)

**CHN analysis** Calculated for C<sub>33</sub>H<sub>52</sub>N<sub>2</sub>Zn: C 73.11%, H 9.67%, N 5.17%. Observed: C 72.73%, H 9.66%, N 5.20%.

### [7DippZnEt][B(C<sub>6</sub>F<sub>5</sub>)<sub>4</sub>](4)

Two separate Schlenk flasks were charged with 7DippZnEt<sub>2</sub> (300 mg, 0.550 mmol, 1eq.) and [Ph<sub>3</sub>C][B(C<sub>6</sub>F<sub>5</sub>)<sub>4</sub>] (507 mg, 0.550 mmol, eq.) and dissolved in PhCl (8.0mL and 3.0mL respectively). Dropwise addition of the bright yellow [Ph<sub>3</sub>C][B(C<sub>6</sub>F<sub>5</sub>)<sub>4</sub>] solution to the solution of 7DippZnEt<sub>2</sub> yielded a clear purple solution. All volatiles were then removed *in vacuo* yielding a viscous oil. Addition of pentane (ca. 10 mL) with vigorous stirring formed a pale purple powder, this was then washed with further pentane (3x5 mL) before filtration to yield the product as an off white powder. Yield: (510 mg, 0.430 mmol, 78%).

**<sup>1</sup>H NMR** <sup>1</sup>H NMR (400 MHz, C<sub>6</sub>D<sub>5</sub>Br) δ 7.21 (t, J = 7.8 Hz, 2H), 7.04 (d, J = 8.1 Hz, 4H), 3.63 (br s, 4H), 2.88 (sept, J = 6.8Hz, 4H), 1.95 (br s, 4H), 1.14 (d, J = 6.8 Hz, 12H), 1.06 (d, J = 6.8 Hz, 12H), 0.26 (t, J = 8.2Hz, 3H), -0.37 (q, J = 8.2 Hz, 2H).

**<sup>11</sup>B NMR** (128 MHz, PhCl) δ -16.32 (s).

**<sup>19</sup>F NMR** (376 MHz, PhCl) δ -131.90 – -132.18 (m), -162.77 (t, J = 20.7 Hz), -166.62 (t, J = 19.6 Hz).

**$^{13}\text{C}\{^1\text{H}\}$  NMR** (126 MHz,  $\text{C}_6\text{D}_5\text{Br}$ )  $\delta$  157.83, 148.68 (dm,  $J_{\text{CF}} = 243.18\text{Hz}$ ,  $\text{C}_{\text{Ar-F}}$ ), 144.80 (C-Ar), 138.52 (dm,  $J_{\text{CF}} = 233.10\text{Hz}$ ,  $\text{C}_{\text{Ar-F}}$ ), 136.56 (dm,  $J_{\text{CF}} = 135.62\text{Hz}$ ,  $\text{C}_{\text{Ar-F}}$ ), 131.39 (C-Ar), 129.81 (C-Ar), 126.63 (C-Ar), 55.31 ( $\text{NCH}_2$ ), 28.74 ( $\text{CH-}^i\text{Pr}$ ), 25.13 ( $\text{NCH}_2\text{CH}_2$ ), 24.65 ( $\text{CH}_3\text{-}^i\text{Pr}$ ), 24.61 ( $\text{CH}_3\text{-}^i\text{Pr}$ ), 9.18 ( $\text{ZnCH}_2\text{CH}_3$ ), 2.83 ( $\text{ZnCH}_2\text{CH}_3$ ).

**Mass Spectrometry** Calculated [ $\text{M}^+$ ]: 511.30252, Observed [ $\text{M}^+$ ] 511.30333

### S3. Catalytic C-H Borylation

#### S3.1 Catalyst optimisation for heteroarene borylation

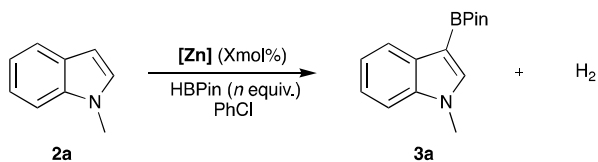

**General procedure A:** A J Young's NMR tube was charged with a [Zn] complex (X mol%) and dissolved in the selected solvent (500  $\mu$ L, PhCl unless otherwise stated), HBPIn (*n* eq.) was then added followed by N-Me-Indole (**2a**) (63  $\mu$ L, 0.50 mmol, 1eq.), the reaction mixture was then heated to the desired temperature and monitored periodically by <sup>1</sup>H and <sup>11</sup>B NMR spectroscopy. Conversions were estimated by comparison of the integrals of the distinguishable N-CH<sub>3</sub> resonances in **2a** and **3a**. For a number of samples *in-situ* yields were determined by integration of diagnostic <sup>1</sup>H resonances of the product against dibromomethane (35 $\mu$ L, 0.50 mmol) added at the end of the reaction as an internal standard.

**Table S1** - Optimization study on the catalytic borylation of **2a**.

| Experiment      | "[Zn]"                                          | "[Zn]"<br>loading<br>(Xmol%) | HBPIn<br>( <i>n</i><br>equiv.) | Temp<br>/ °C | Cumulative<br>time / h | Conversion       |
|-----------------|-------------------------------------------------|------------------------------|--------------------------------|--------------|------------------------|------------------|
| 1               | <b>1-H</b>                                      | 100                          | 2                              | 100          | 18                     | 100%             |
| 2               | <b>1-Ph</b>                                     | 10                           | 2.3                            | 100          | 18                     | 35%              |
|                 |                                                 |                              |                                |              | 36                     | 78%              |
|                 |                                                 |                              |                                |              | 100                    | 85%              |
| 3 <sup>a</sup>  | <b>1-Ph</b>                                     | 10                           | 2.3                            | 100          | 18                     | 52%              |
|                 |                                                 |                              |                                |              | 36                     | 72%              |
|                 |                                                 |                              |                                |              | 100                    | 74%              |
| 4               | <b>1-Ph</b>                                     | 10                           | 3                              | 100          | 40                     | 50%              |
|                 |                                                 |                              |                                |              | 64                     | 67%              |
|                 |                                                 |                              |                                |              | 84                     | 75%              |
| 5               | <b>1-Ph</b>                                     | 10                           | 1.5                            | 100          | 16                     | 32%              |
|                 |                                                 |                              |                                |              | 80                     | 72%              |
| 6               | <b>1-Ph</b>                                     | 10                           | 1.5                            | 120          | 16                     | 57%              |
|                 |                                                 |                              |                                |              | 80                     | 59%              |
| 7               | <b>4</b>                                        | 10                           | 2                              | 80           | 16                     | 36%              |
|                 |                                                 |                              |                                |              | 36                     | 47%              |
|                 |                                                 |                              |                                |              | 60                     | 56%              |
| 8               | <b>5</b>                                        | 10                           | 2                              | 60           | 1                      | 26%              |
|                 |                                                 |                              |                                |              | 2                      | 33%              |
|                 |                                                 |                              |                                |              | 16                     | 53%              |
|                 |                                                 |                              |                                |              | 40                     | 82%              |
| 9               | <b>5</b>                                        | 10                           | 2                              | 80           | 18                     | 97%              |
| 10 <sup>a</sup> | <b>5</b>                                        | 10                           | 2                              | 80           | 18                     | 80%              |
| 11 <sup>b</sup> | <b>5</b>                                        | 10                           | 2                              | 80           | 18                     | 91%              |
| 12              | <b>5</b>                                        | 5                            | 2                              | 80           | 18                     | 94% <sup>c</sup> |
| 13              | <b>5</b>                                        | 5                            | 2                              | 80           | 18                     | 0% <sup>d</sup>  |
| 14              | <b>6</b>                                        | 10                           | 2                              | 80           | 18                     | 0%               |
| 15              | Zn(C <sub>6</sub> F <sub>5</sub> ) <sub>2</sub> | 5                            | 2                              | 80           | 18                     | 0%               |
| 16              | <b>9</b>                                        | 5                            | 2                              | 80           | 18                     | 72%              |

[a] C<sub>6</sub>D<sub>6</sub> used as solvent. [b] Toluene used as solvent. [c] Yield confirmed by use of Dibromomethane as an internal standard. [d] H-9BBN used as boron source.

### S3.2 Borylation using pinacolborane

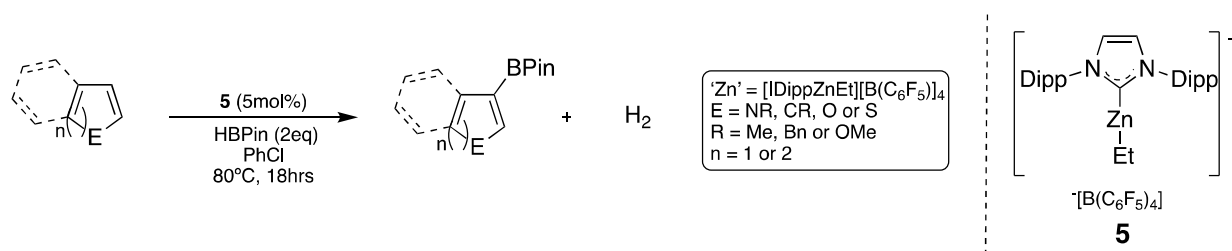

**General procedure B:** A J. Young's NMR tube was charged with **5** (29 mg, 0.025 mmol), PhCl (0.5 mL), Pinacolborane (145  $\mu$ L, 1.00 mmol) and the substrate (0.50 mmol). The reaction mixture was then heated at 80 °C for 18 hours and monitored by <sup>1</sup>H and <sup>11</sup>B NMR spectroscopy. Conversion was estimated by comparison of the integrals of diagnostic resonances in the <sup>1</sup>H NMR spectra of the substrate and product. For a number of samples *in-situ* yields were determined by integration of diagnostic <sup>1</sup>H resonances against dibromomethane (35  $\mu$ L, 0.50 mmol) added at the end of the reaction as an internal standard.

**Table S2** - Scoping of borylation using **5** .

| Substrate | Conversion       | Substrate | Conversion       |
|-----------|------------------|-----------|------------------|
|           | 94% <sup>a</sup> |           | 76% <sup>a</sup> |
|           | 86% <sup>a</sup> |           | 0%               |
|           | 74% <sup>a</sup> |           | 0%               |
|           | 5% <sup>a</sup>  |           | 0%               |
|           | 0%               |           | 0%               |
|           | 14%              |           | 0%               |

[a]: Confirmed by integration against dibromomethane (35  $\mu$ L, 0.50mmol).

## Borylation of N-Me-indole

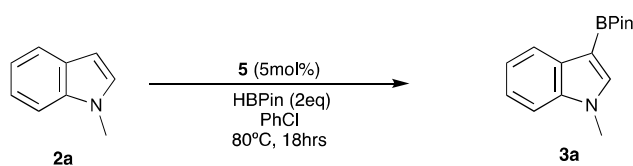

*Yield:* 94% by integration against dibromomethane as internal standard.

Product was synthesised according to general procedure B, the reaction mixture was then extracted with pentane (ca. 5 mL) and filtered through a short pad of silica rinsing with pentane (ca. 10 mL), the resulting filtrate was dried *in vacuo* and redissolved in CDCl<sub>3</sub> allowing confirmation of the product as 1-methyl-3-(4,4,5,5-tetramethyl-1,3,2-dioxaborolan-2-yl)-indole by comparison of NMR data to previously reported literature.<sup>11</sup>

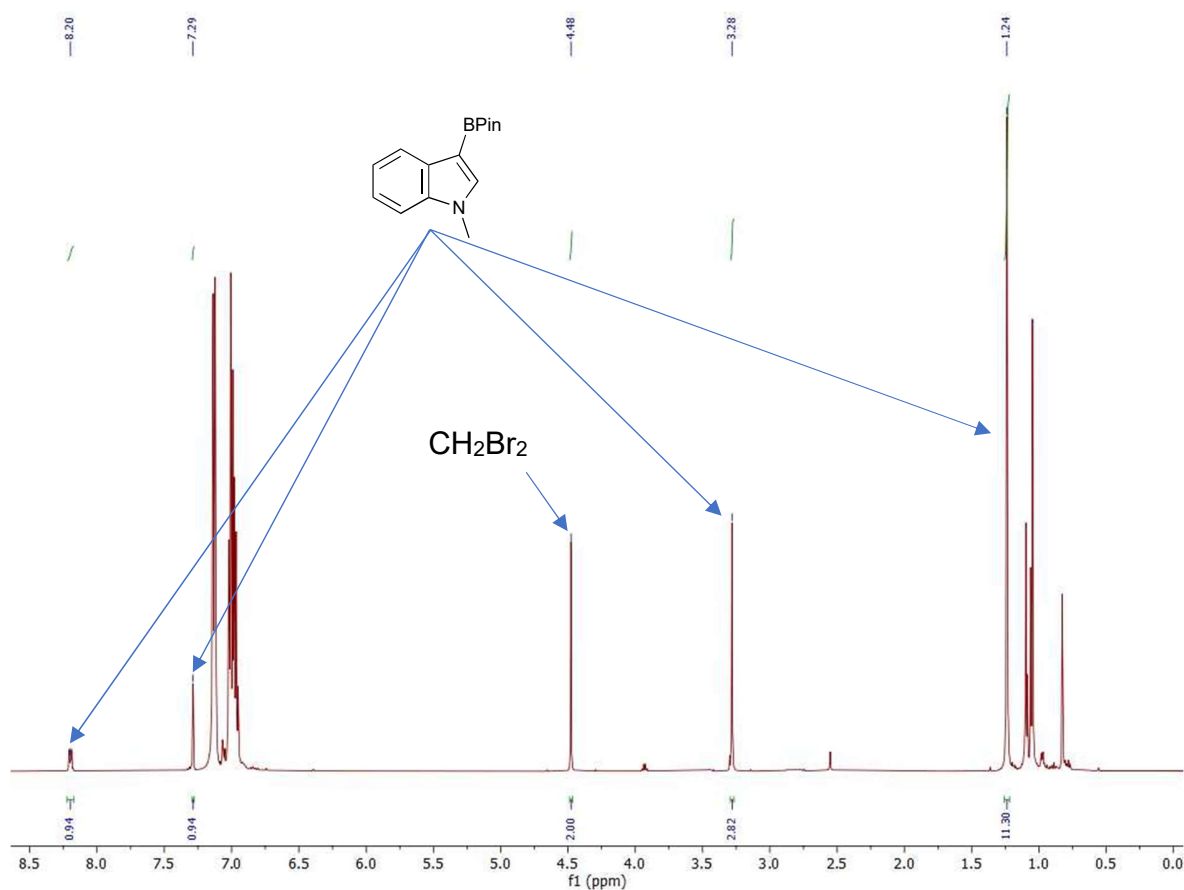

**Figure S1:** Borylation of N-Me-indole using **5** in PhCl with CH<sub>2</sub>Br<sub>2</sub> internal standard as observed by <sup>1</sup>H NMR spectroscopy of the crude reaction mixture.



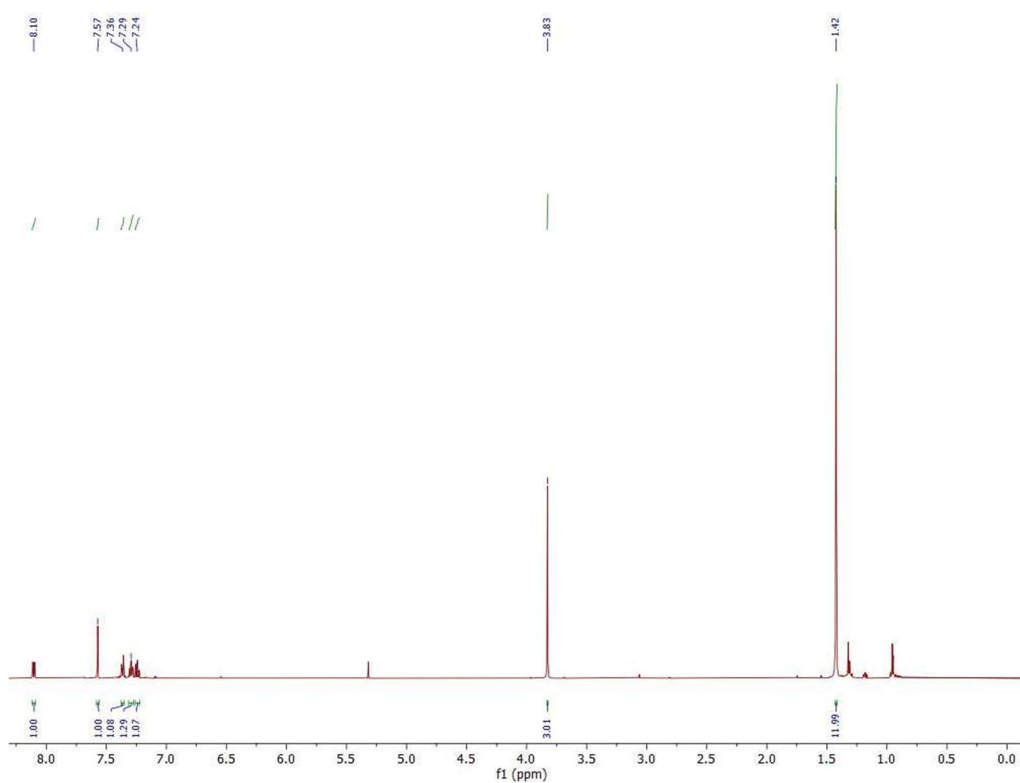

**Figure S2:**  $^1\text{H}$  NMR spectrum ( $\text{CDCl}_3$ ) of reaction mixture after partial work-up/ filtration .

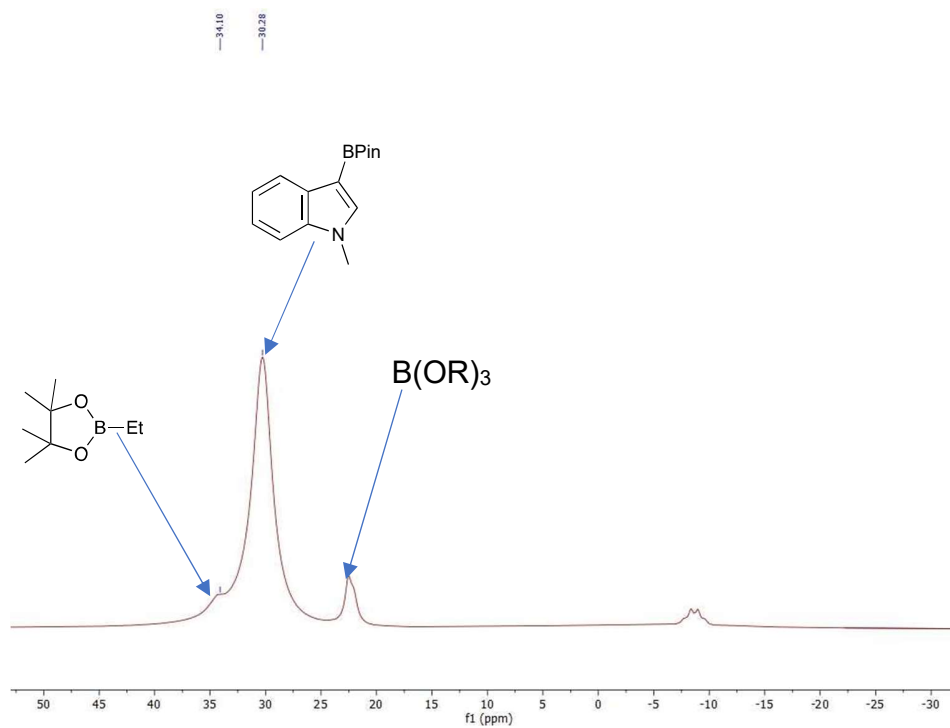

**Figure S3:**  $^{11}\text{B}$  NMR spectrum ( $\text{CDCl}_3$ ) of reaction mixture after partial work-up/ filtration

## Borylation of 5-Methyl-N-benzyl-indole

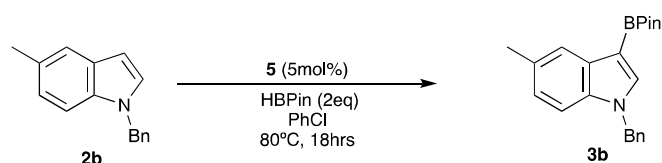

*Yield:* 76% by integration against dibromomethane as internal standard.

Product was synthesised according to general procedure B, the reaction mixture was then extracted with pentane (ca. 5 mL) before filtration through a short pad of silica (silica pretreated with  $\text{NEt}_3$  (ca. 5mL)) using pentane (ca. 10 mL) as an eluent. The resulting filtrate was dried *in vacuo* and redissolved in  $\text{CDCl}_3$  allowing confirmation of the product as 5-methyl-N-benzyl-3-(4,4,5,5-tetramethyl-1,3,2-dioxaborolan-2-yl)indole, unfortunately clean isolation of this compound proved elusive in our hands despite multiple attempts due to its propensity to undergo protodeboration.  $^1\text{H}$ ,  $^{11}\text{B}$  and  $^{13}\text{C}\{^1\text{H}\}$  NMR spectra of the crude filtrate can be seen in **Figures S5-7**.

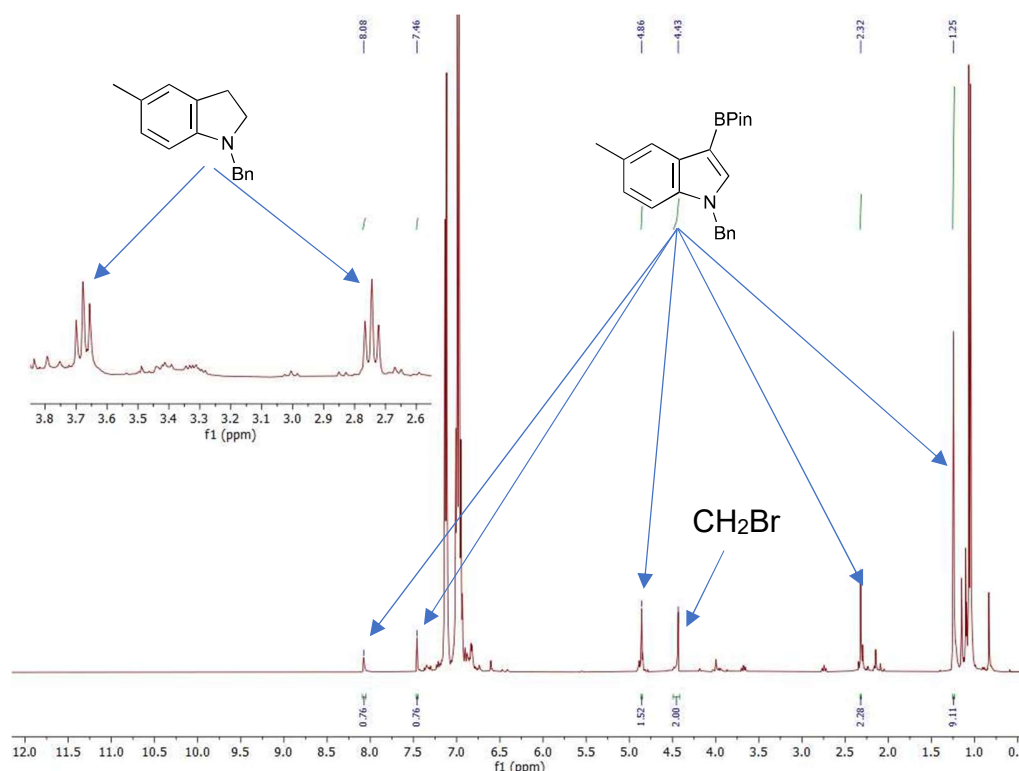

**Figure S4:** Borylation of 5-Me-N-Bn-indole using **5** in PhCl with  $\text{CH}_2\text{Br}_2$  internal standard as observed by  $^1\text{H}$  NMR spectroscopy. Inset left, diagnostic resonances for the indoline congener.

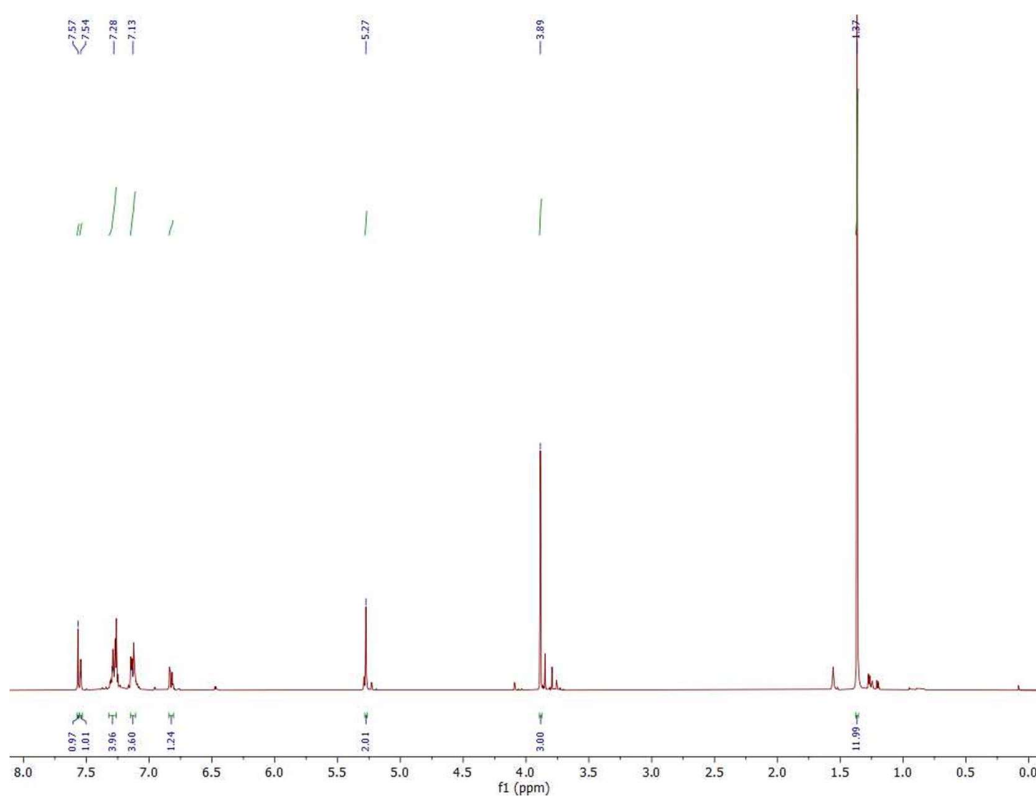

**Figure S5:**  $^1\text{H}$  NMR spectrum ( $\text{CDCl}_3$ ) of reaction mixture after partial work-up/ filtration

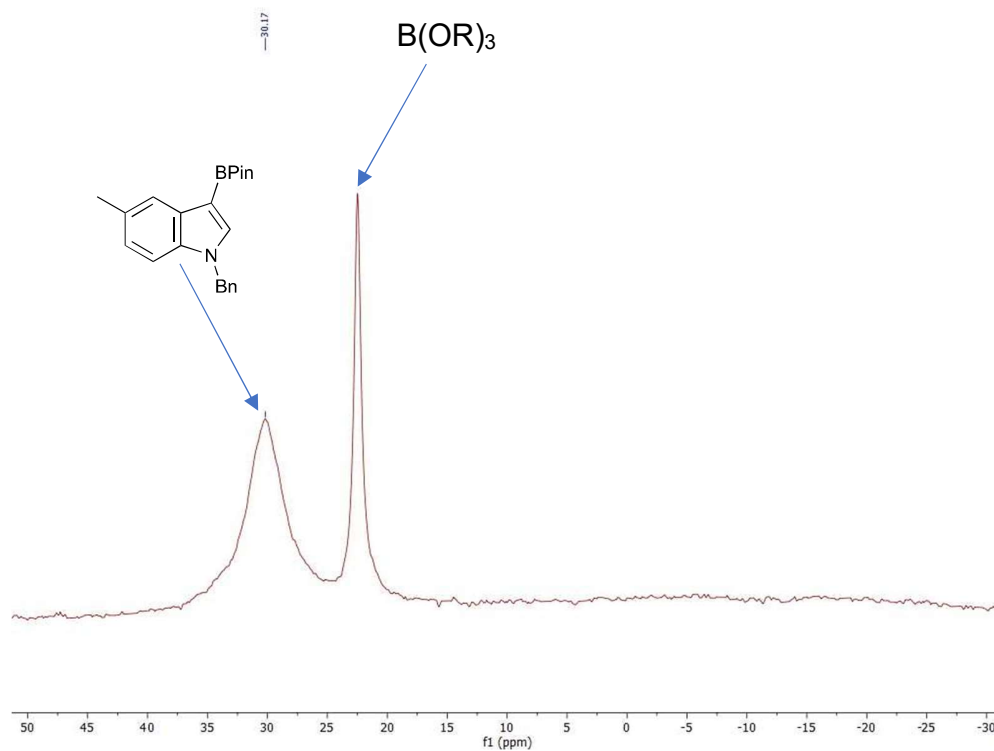

**Figure S6:**  $^{11}\text{B}$  NMR spectrum ( $\text{CDCl}_3$ ) of reaction mixture after partial work-up/ filtration

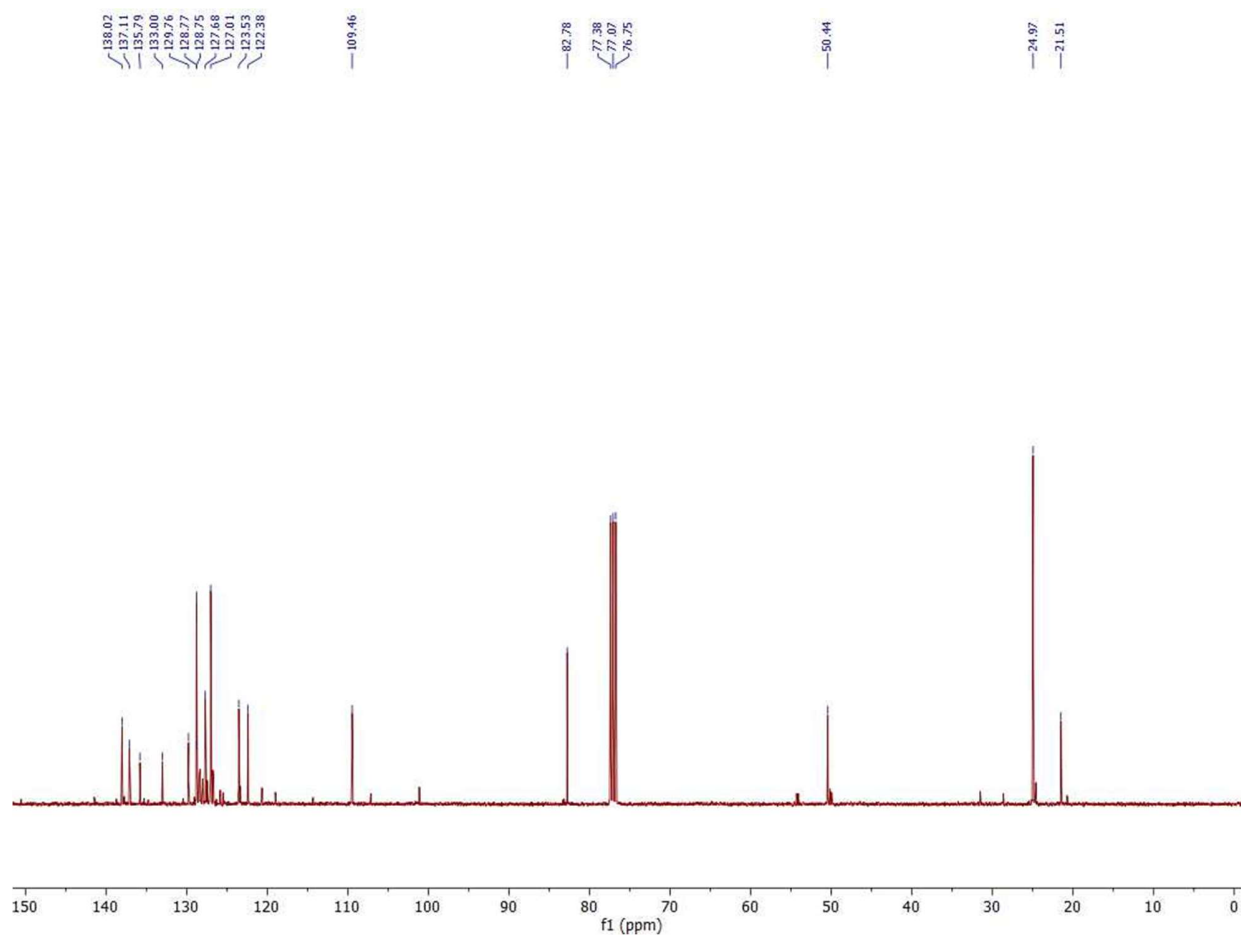

**Figure S7:**  $^{13}\text{C}\{^1\text{H}\}$  NMR spectrum ( $\text{CDCl}_3$ ) of reaction mixture after partial work-up/ filtration

## Borylation of 5-methoxy-N-benzyl-indole

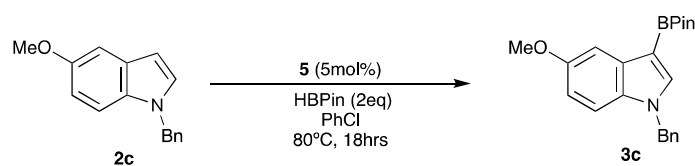

*Yield:* 74% by integration against dibromomethane as internal standard.

Product was synthesised according to general procedure B, the reaction mixture was then extracted with pentane (ca. 5 mL) before filtration through a short pad of silica (pretreated with  $\text{NEt}_3$  (ca. 5mL)) using pentane (ca. 10 mL) as an eluent, the resulting filtrate was dried *in vacuo* and redissolved in  $\text{CDCl}_3$  allowing confirmation of the product as 5-methoxy-N-benzyl-3-(4,4,5,5-tetramethyl-1,3,2-dioxaborolan-2-yl)indole, unfortunately clean isolation of this compound proved elusive in our hands despite multiple attempts due to its propensity to undergo protodeboronation.  $^1\text{H}$ ,  $^{11}\text{B}$  and  $^{13}\text{C}\{^1\text{H}\}$  NMR spectra of the crude filtrate can be seen in **Figures S9-11**.

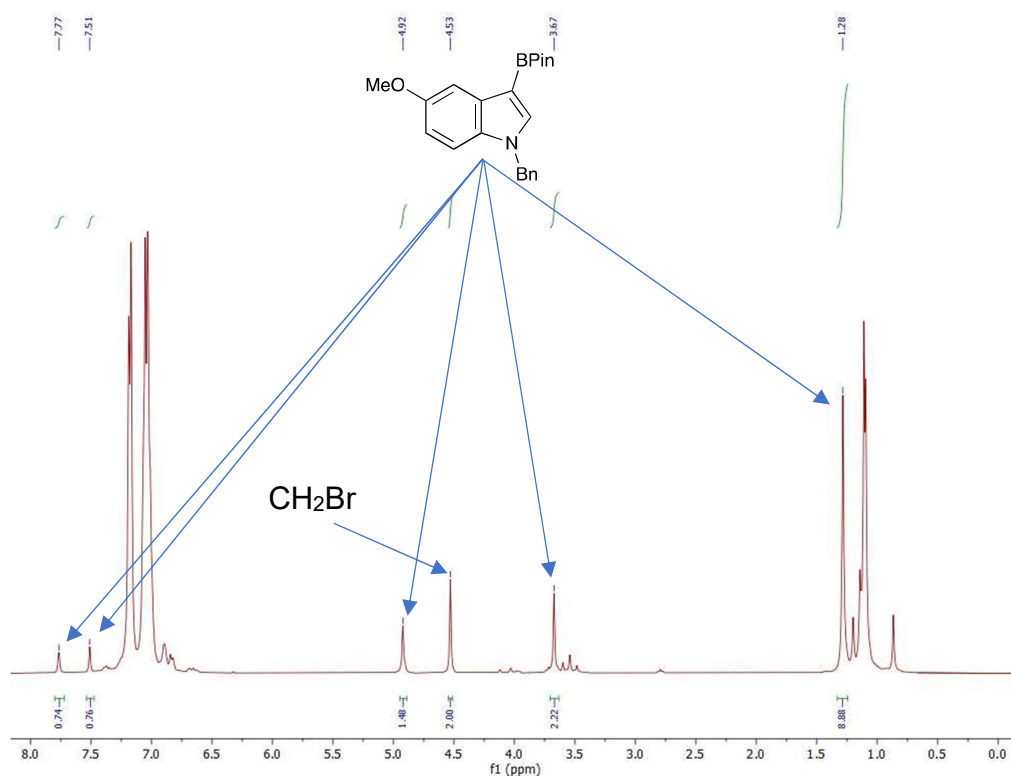

**Figure S8:** Borylation of 5-MeO-N-Bn-indole using **5** in PhCl with  $\text{CH}_2\text{Br}_2$  internal standard as observed by  $^1\text{H}$  NMR spectroscopy.

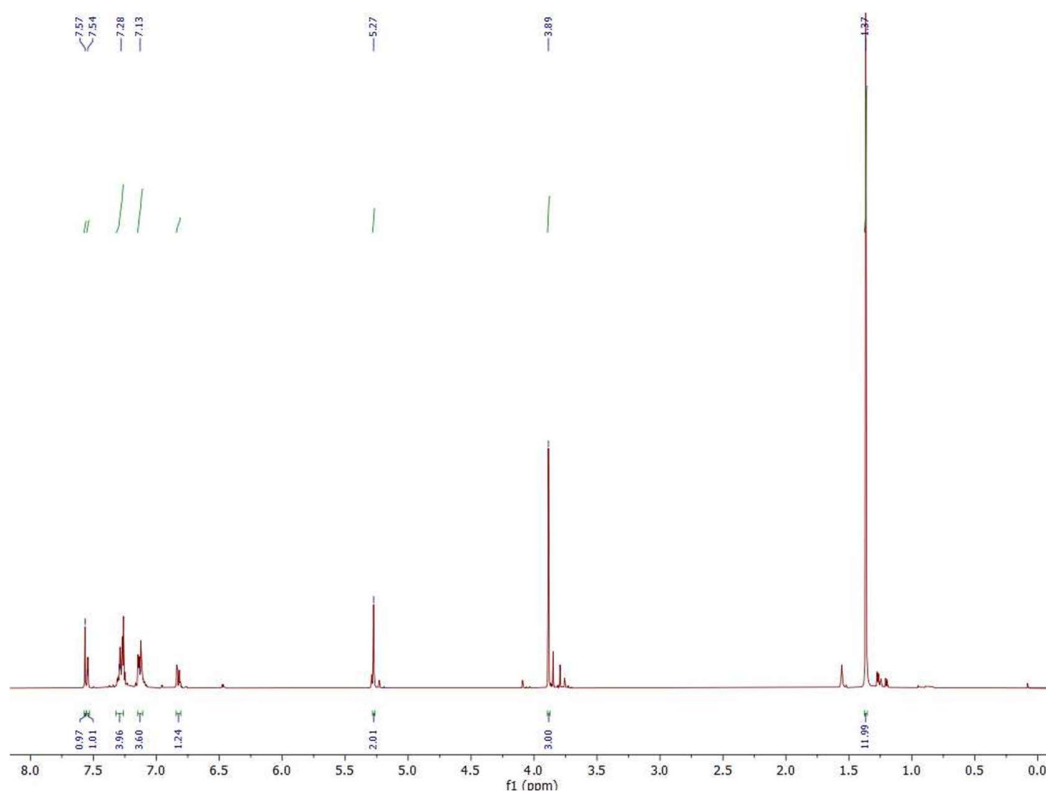

**Figure S9:**  $^1\text{H}$  NMR spectrum ( $\text{CDCl}_3$ ) of reaction mixture after partial work-up/ filtration

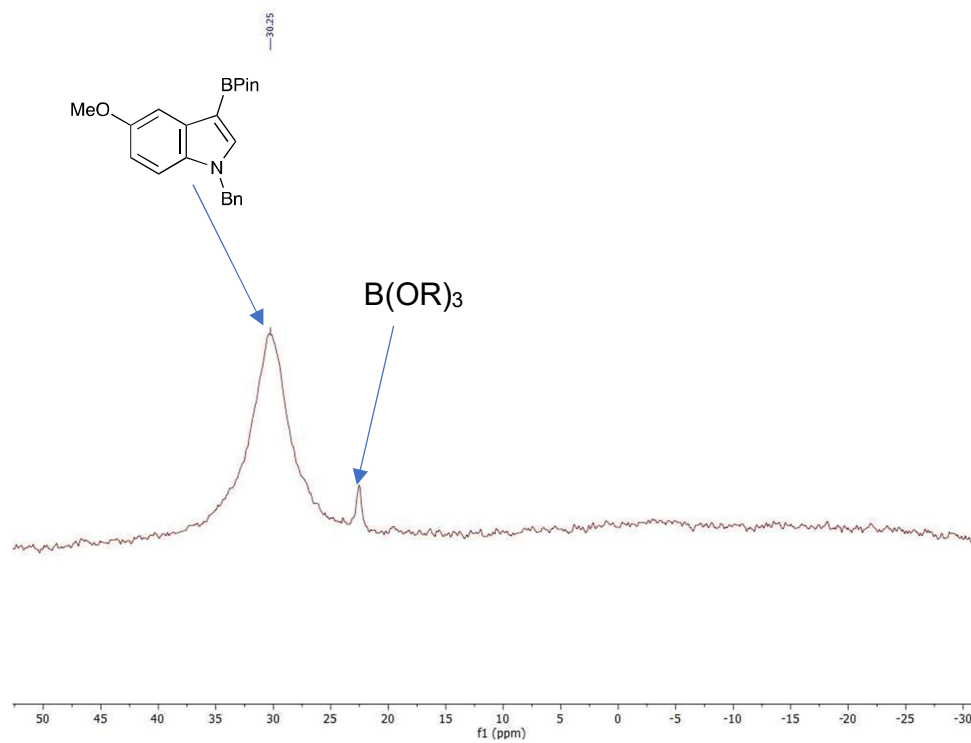

**Figure S10:**  $^{11}\text{B}$  NMR spectrum ( $\text{CDCl}_3$ ) of reaction mixture after partial work-up/ filtration.

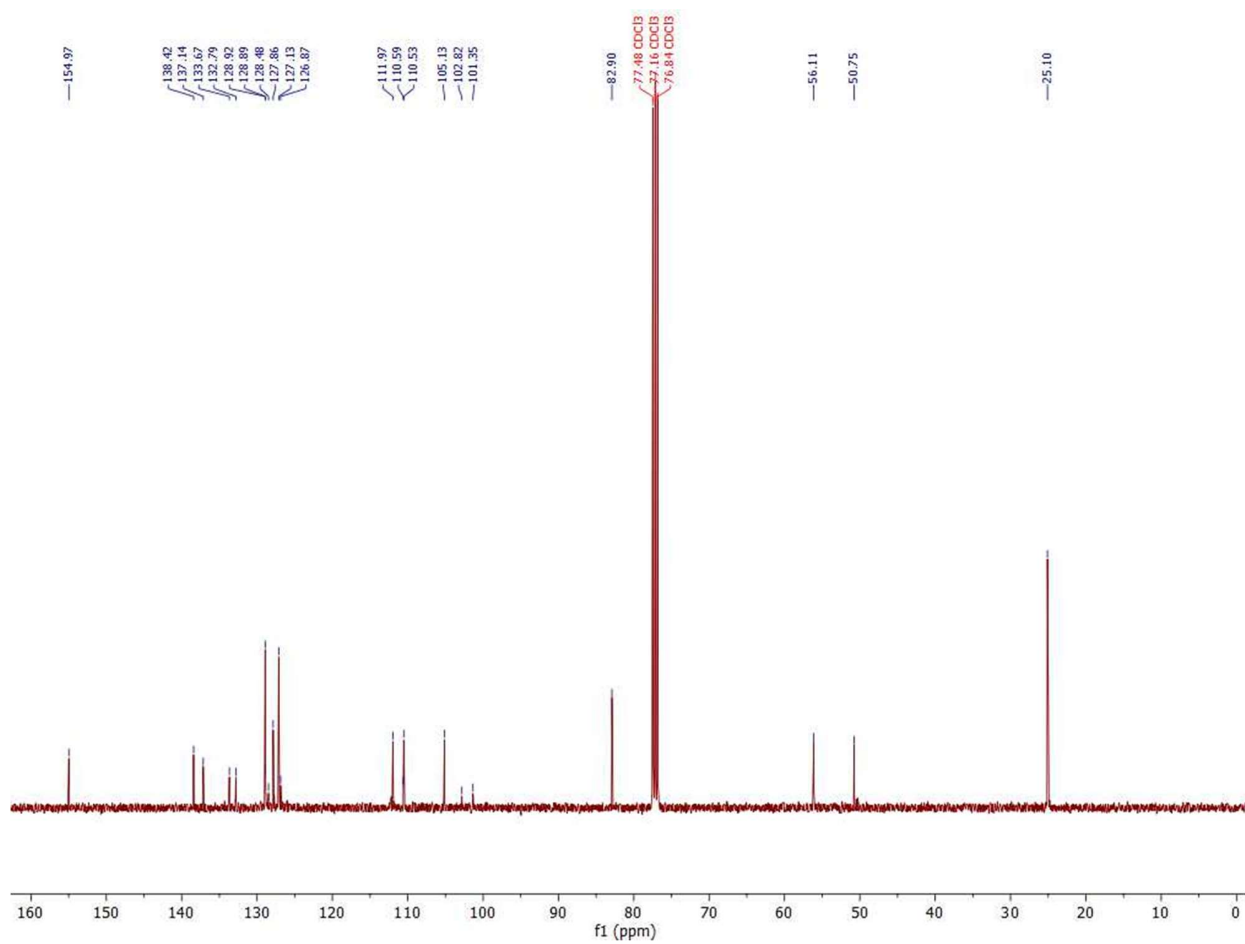

**Figure S11:**  $^{13}\text{C}\{^1\text{H}\}$  NMR spectrum ( $\text{CDCl}_3$ ) of reaction mixture after partial work-up/ filtration

## Borylation of 1,2-dimethylindole

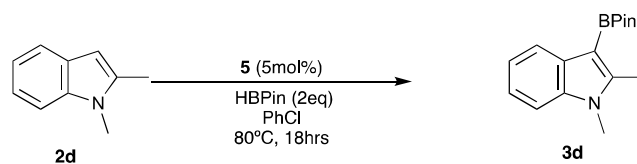

*Yield:* 86% by integration against dibromomethane as internal standard.

Product was synthesised according to general procedure B, the reaction mixture was then extracted with pentane (ca. 5 mL) and filtered through a short pad of silica rinsing with pentane (ca. 10 mL), the resulting filtrate was dried *in vacuo* and redissolved in CDCl<sub>3</sub> allowing confirmation of the product as 1,2-dimethyl-3-(4,4,5,5-tetramethyl-1,3,2-dioxaborolan-2-yl)-indole by comparison of NMR data to previously reported literature.<sup>11</sup>

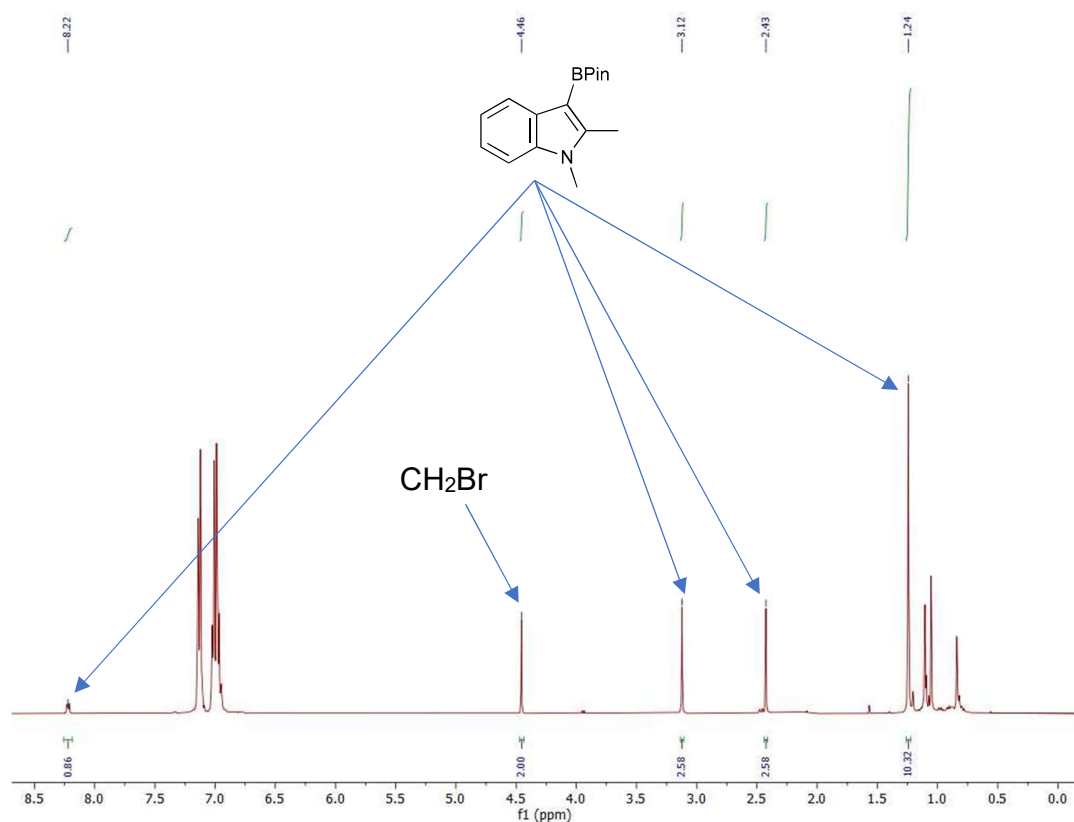

**Figure S12:** Borylation of 1,2-dimethylindole using **5** in PhCl with CH<sub>2</sub>Br<sub>2</sub> internal standard as observed by <sup>1</sup>H NMR spectroscopy.



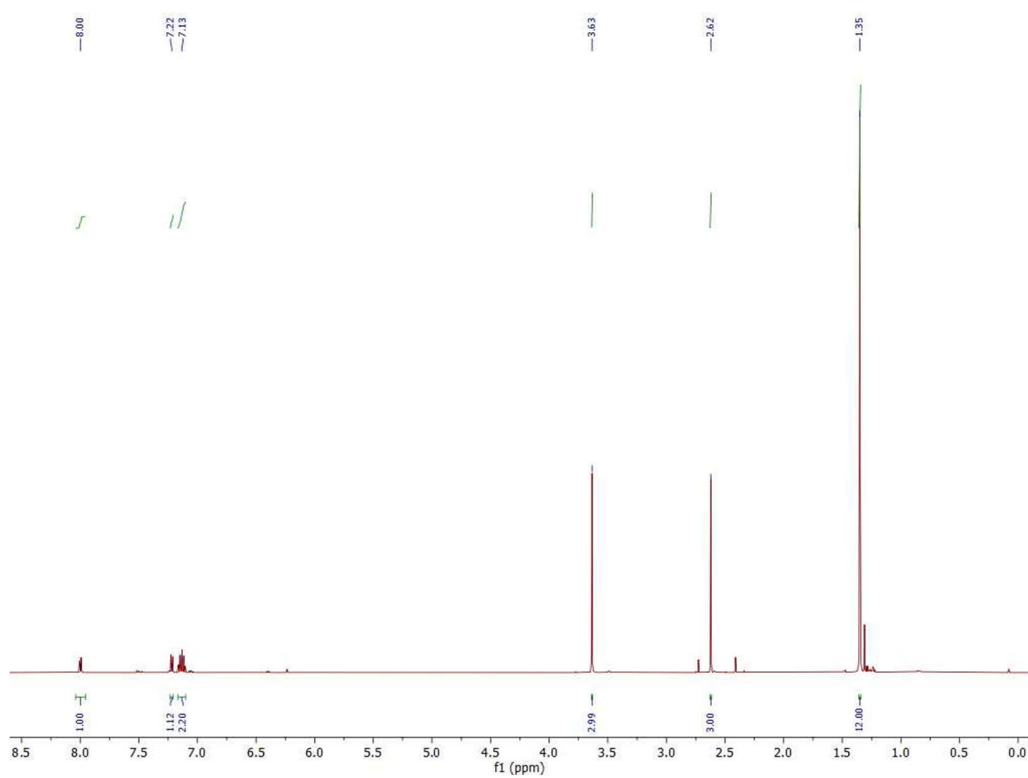

**Figure S13:**  $^1\text{H}$  NMR spectrum ( $\text{CDCl}_3$ ) of reaction mixture after partial work-up/ filtration

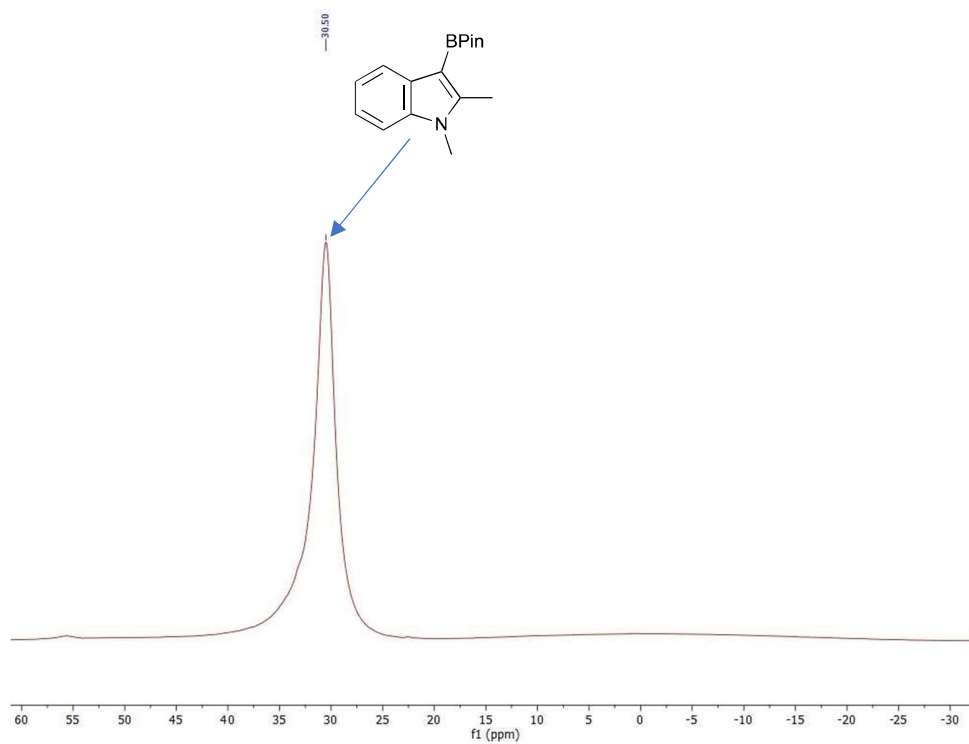

**Figure S14:**  $^{11}\text{B}$  NMR spectrum ( $\text{CDCl}_3$ ) of reaction mixture after partial work-up/ filtration

### S3.3 Base assisted C-H borylation

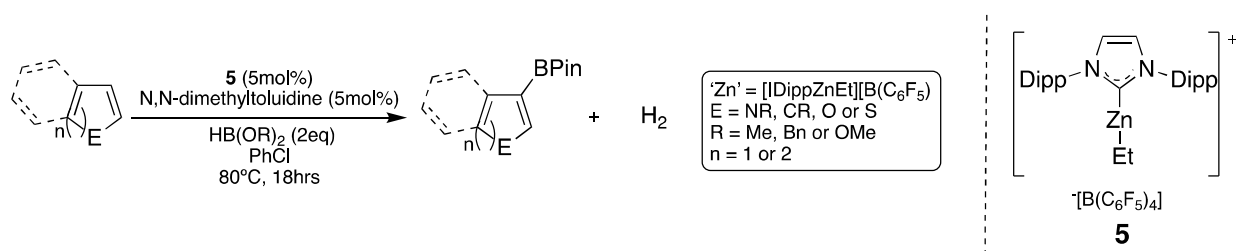

**General procedure C:** A J. Young's NMR tube was charged with Zinc complex **5** (29 mg, 0.025 mmol), PhCl (0.5 mL), boron source (1.00 mmol, 2 eq.), N,N-dimethyltoluidine (4.0  $\mu\text{L}$ , ca. 0.025 mmol) and the substrate (0.50 mmol, 1 eq.). The reaction mixture was then heated to the desired temperature and monitored by  $^1\text{H}$  and  $^{11}\text{B}$  NMR spectroscopy. Conversion was estimated by comparison of the integrals of diagnostic resonances in the  $^1\text{H}$  NMR spectra of the substrate and product. For a number of samples *in-situ* yields were determined by integration of diagnostic  $^1\text{H}$  resonances against dibromomethane (35  $\mu\text{L}$ , 0.50 mmol) added at the end of the reaction as an internal standard. DBP = 2,6-di-*tert*-butyl-4-methylpyridine, DMT = N,N-dimethyl-*p*-toluidine.

**Table S3** - Summary of base assisted C-H borylation reactions.

| Substrate                                                                           | Catalyst (loading) | Base (loading) | Temp / °C | Time / hrs | Boron source | Conversion        |
|-------------------------------------------------------------------------------------|--------------------|----------------|-----------|------------|--------------|-------------------|
| 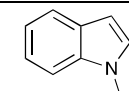 | <b>5</b> (5 mol%)  | DBP (100mol%)  | 80        | 18         | HBPIn        | 62% <sup>a</sup>  |
|  | <b>5</b> (5 mol%)  | DBP (100mol%)  | 80        | 1          | HBCat        | 0%                |
|  | <b>5</b> (5 mol%)  | -              | 80        | 1          | HBCat        | 67% <sup>a</sup>  |
|  | <b>5</b> (5 mol%)  | DMT (5 mol%)   | 80        | 18         | HBCat        | >99% <sup>a</sup> |

|                                                                                     |                                                         |               |     |     |       |                    |
|-------------------------------------------------------------------------------------|---------------------------------------------------------|---------------|-----|-----|-------|--------------------|
| 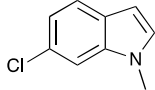   | <b>5</b> (5 mol%)                                       | DMT (5 mol%)  | 80  | 18  | HBCat | >99% <sup>a</sup>  |
|    | <b>5</b> (5mol%)                                        | DMT (5 mol%)  | 80  | 18  | HBCat | 89% <sup>a,b</sup> |
|    | <b>5</b> (5mol%)                                        | DMT (5 mol%)  | 80  | 36  | HBCat | 55% <sup>a</sup>   |
|    | <b>5</b> (5mol%)                                        | DMT (5 mol%)  | 100 | 18  | HBCat | 81% <sup>a</sup>   |
|    | <b>5</b> (5mol%)                                        | DMT (5 mol%)  | 100 | 36  | HBCat | 22% <sup>a</sup>   |
|    | <b>5</b> (5mol%)                                        | DMT (5 mol%)  | 100 | 120 | HBCat | 51% <sup>a</sup>   |
|   | <b>5</b> (5 mol%)                                       | DMT (5 mol%)  | 80  | 18  | HBPIn | 31%                |
|  | <b>5</b> (5 mol%)                                       | DMT (5 mol%)  | 80  | 18  | HBCat | 45% <sup>a</sup>   |
|  | <b>5</b> (5 mol%)                                       | DMT (10 mol%) | 80  | 18  | HBCat | 45% <sup>a</sup>   |
|  | <b>5</b> (5 mol%)                                       | DMT (5 mol%)  | 80  | 36  | HBCat | 73% <sup>a</sup>   |
|  | B(C <sub>6</sub> F <sub>5</sub> ) <sub>3</sub> (5 mol%) | DMT (5 mol%)  | 80  | 36  | HBCat | 32% <sup>a</sup>   |
|  | <b>5</b> (5 mol%)                                       | DMT (5 mol%)  | 100 | 18  | HBCat | 74% <sup>a</sup>   |

[a] Yield confirmed by use of dibromomethane as an internal standard. [b] 73:16 mixture of the 2- and 3-BCat regioisomers.

## Borylation of 5-Br-N-Me-indole

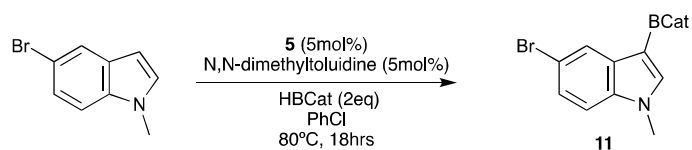

*Yield:* ca. 99% by integration against dibromomethane as internal standard.

Product was synthesised according to general procedure C, crystals suitable for X-ray crystallography were isolated upon cooling the reaction mixture to room temperature. Analysis of the isolated crystals by X-ray crystallography confirmed the product as 3-(1,3,2-benzodioxaborole)-5-bromo-N-methylindole (**11**). Dissolution of a small amount of unwashed crystalline material in DCM provided additional confirmation of the formulation as **11** by comparison of NMR data to previously reported literature.<sup>12</sup>

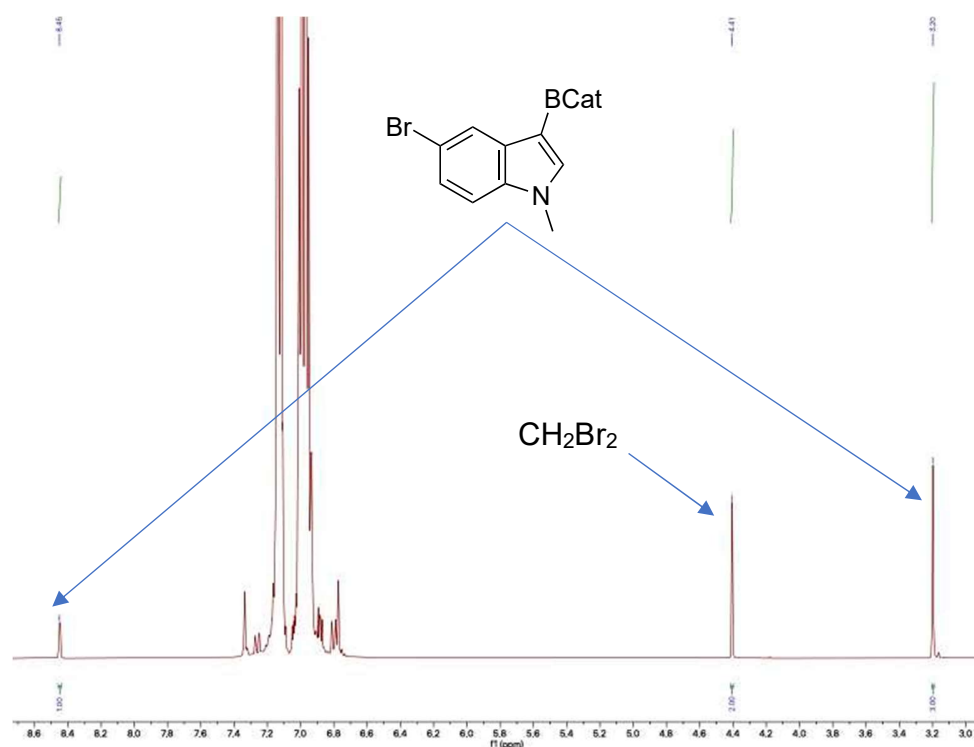

**Figure S15:** Borylation of 5-Br-N-Me-indole using **5** in PhCl with CH<sub>2</sub>Br<sub>2</sub> internal standard as observed by <sup>1</sup>H NMR spectroscopy at 60 °C.

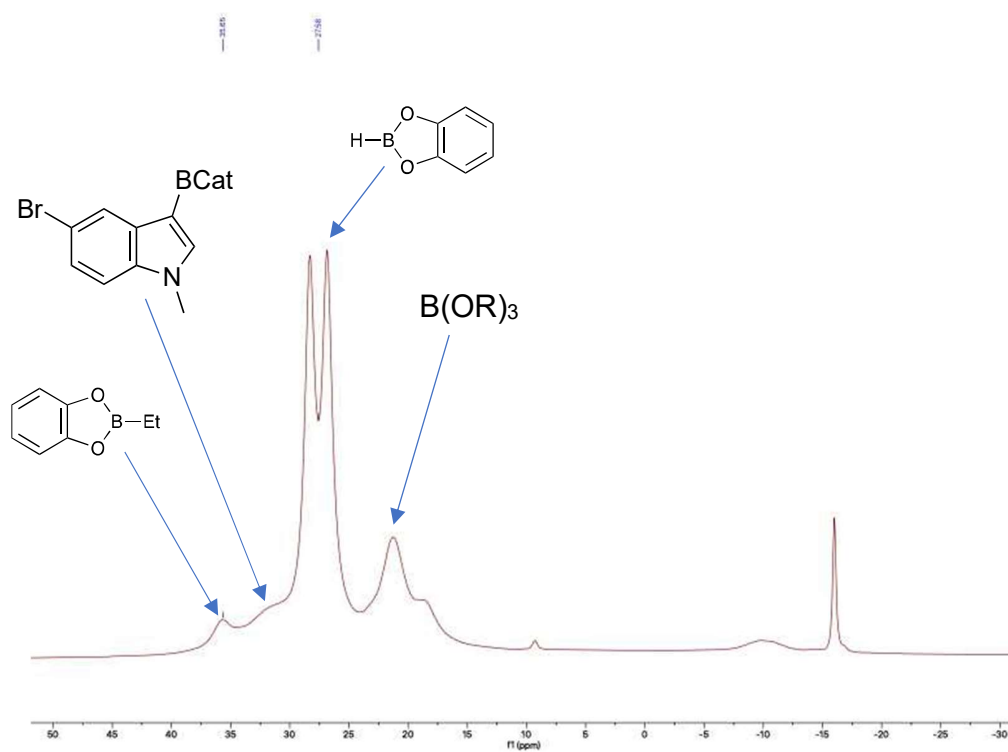

**Figure S16:** Borylation of 5-Br-N-Me-indole using **5** in PhCl as observed by  $^{11}\text{B}$  NMR spectroscopy at 60°C.

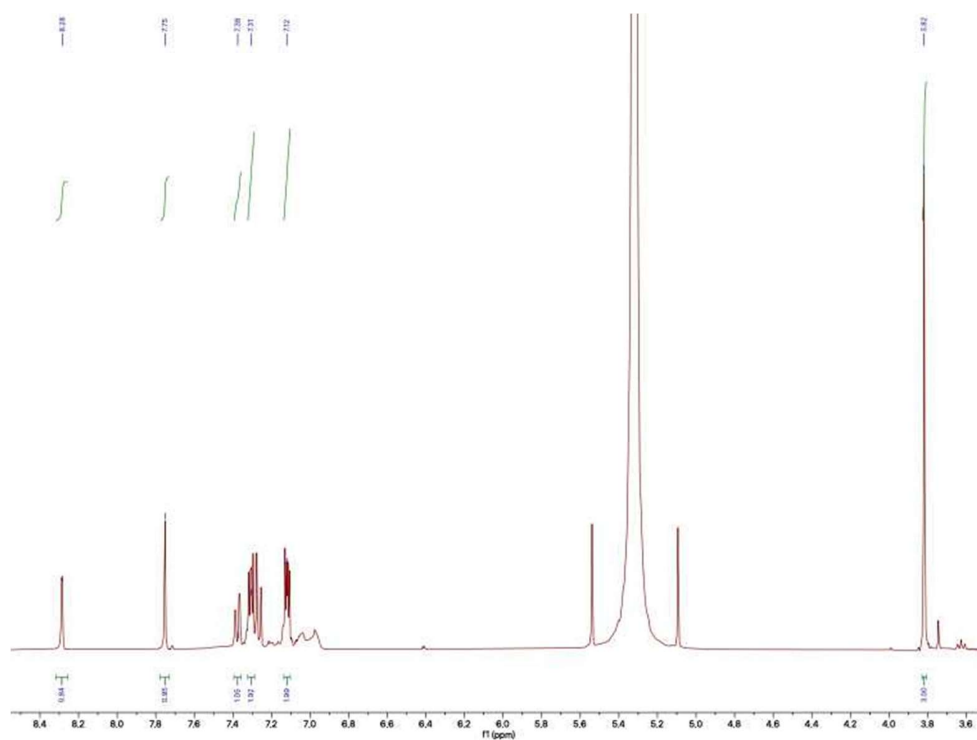

**Figure S17:** Unwashed crystalline material isolated from borylation of 5-Br-N-Me-indole using **5** as observed by  $^1\text{H}$  NMR spectroscopy in DCM. Note this compound is poorly soluble in chlorinated organic solvents at room temperature.

## Borylation of 6-Cl-N-Me-indole

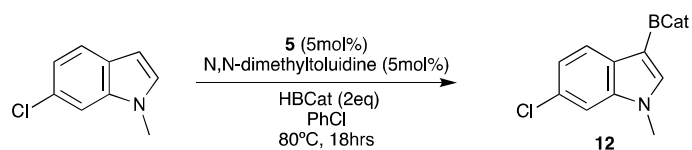

*Yield:* ca. 99% by integration against dibromomethane as internal standard.

Product was synthesised according to general procedure C but  $C_6D_5Br$  (0.5mL) was used as the solvent, volatiles were then removed, and the crude solids were redissolved in  $C_6D_6$  allowing confirmation of the product as 3-(1,3,2-benzodioxaborole)-6-chloro-N-methylindole by comparison of NMR data to previously reported literature.<sup>11</sup>

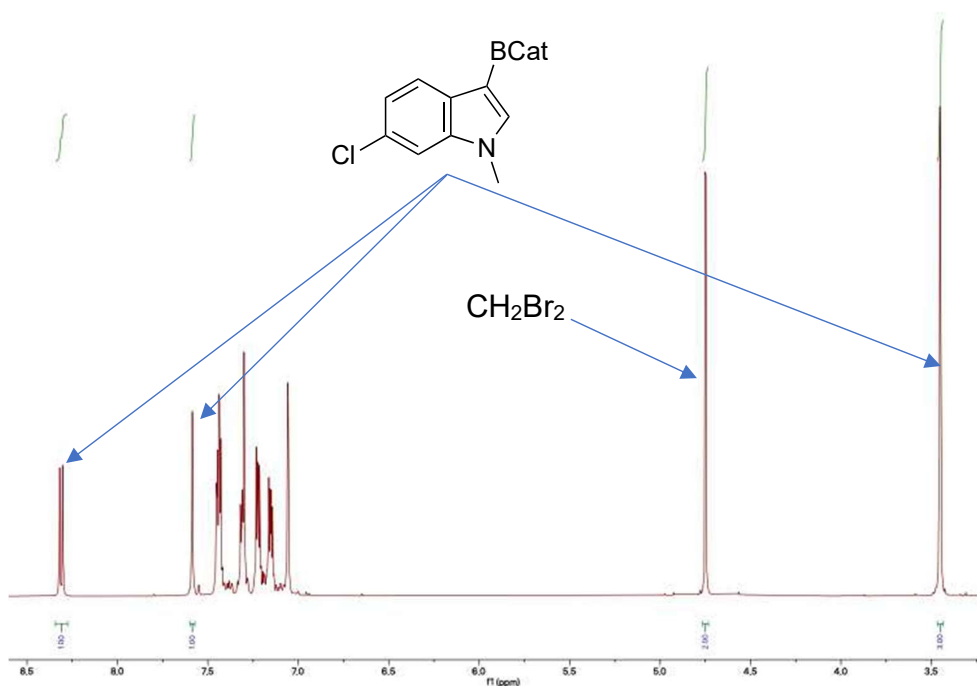

**Figure S18:** Borylation of 6-Cl-N-Me-indole using **5** in  $C_6D_5Br$  with  $CH_2Br_2$  internal standard as observed by  $^1H$  NMR spectroscopy.

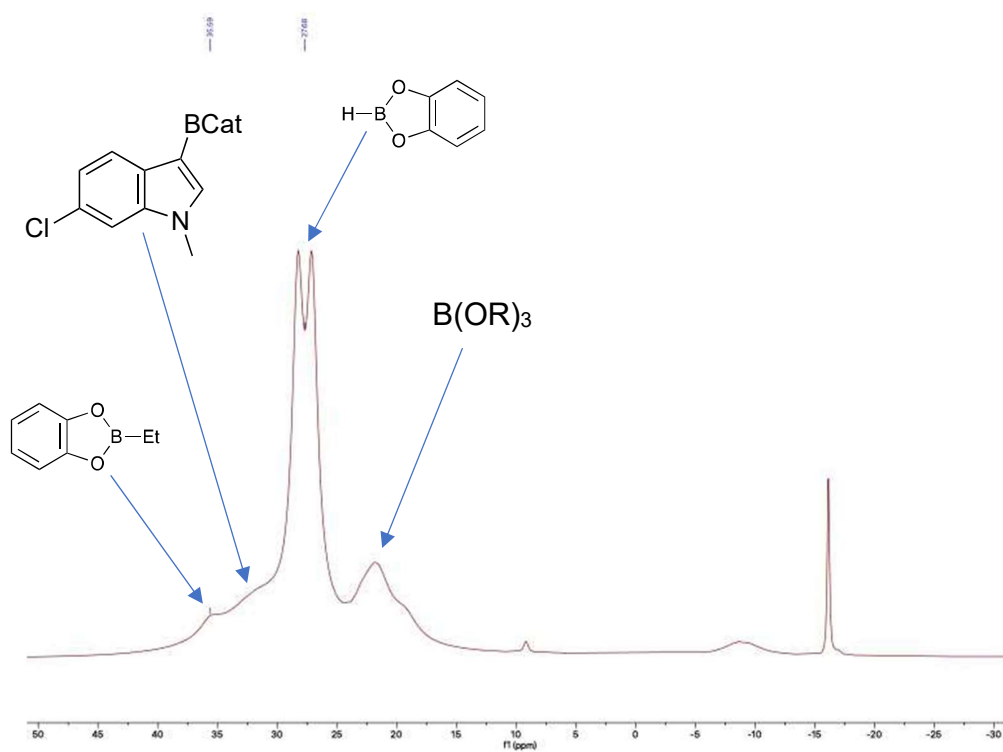

**Figure S19:** Borylation of 6-Cl-N-Me-indole using **5** in  $C_6D_5Br$  as observed by  $^{11}B$  NMR spectroscopy.

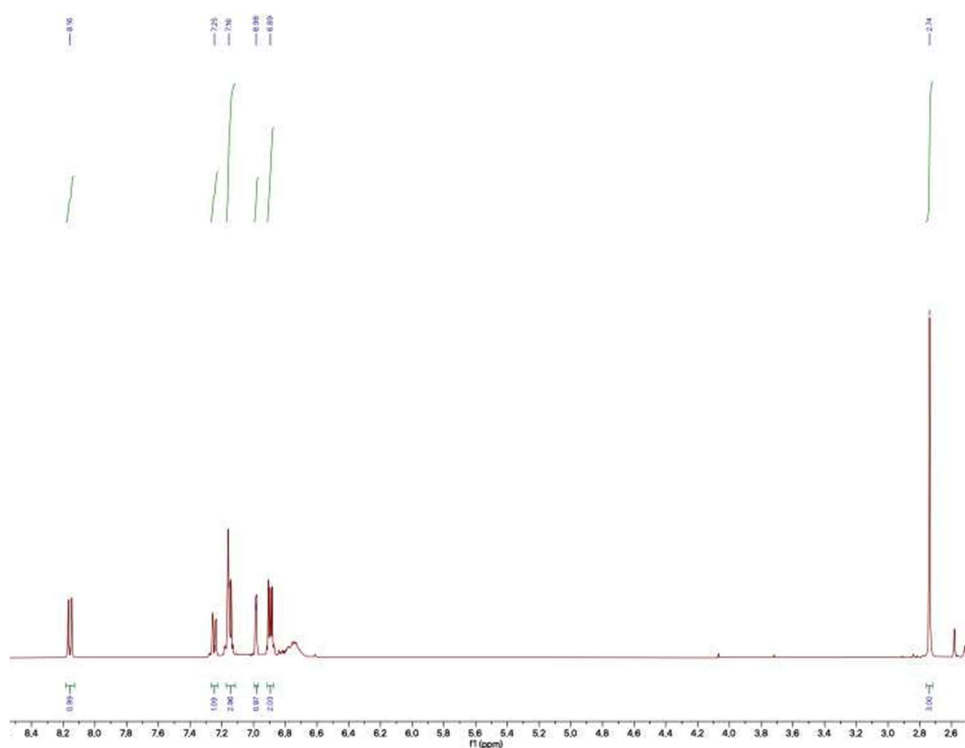

**Figure S20:** Crude reaction mixture of the Borylation of 6-Cl-N-Me-indole using **5** in as observed by  $^{11}B$  NMR spectroscopy in  $C_6D_6$ .

## Borylation of N-methylpyrrole

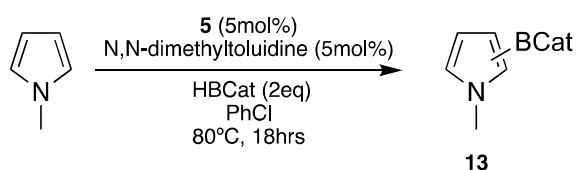

*Yield:* 89% (73:16 ratio of 2-:3-borylated regioisomers) by integration against dibromomethane as an internal standard.

Product was synthesised according to general procedure C. To confirm the identity conversion to the boronic acid pinacol ester was achieved by drying of the reaction mixture *in vacuo* before dissolving in DCM (0.5 mL) and reacting with 1M solution of pinacol in NEt<sub>3</sub> (0.75 mL, 0.75mmol) for 18 hrs at room temperature. The reaction mixture was then dried before extraction of the product with pentane (ca. 5 mL) and filtering through a short pad of silica and rinsing with pentane (ca. 10 mL). The resulting filtrate was dried *in vacuo* and redissolved in CDCl<sub>3</sub> confirming a mixture of regioisomers of 2- and 3-(4,4,5,5-tetramethyl-1,3,2-dioxaborolan-2-yl)-1-methyl-pyrrole, thus confirming initial products are 2-(1,3,2-benzodioxaborole)-N-methylpyrrole and 3-(1,3,2-benzodioxaborole)-N-methylpyrrole

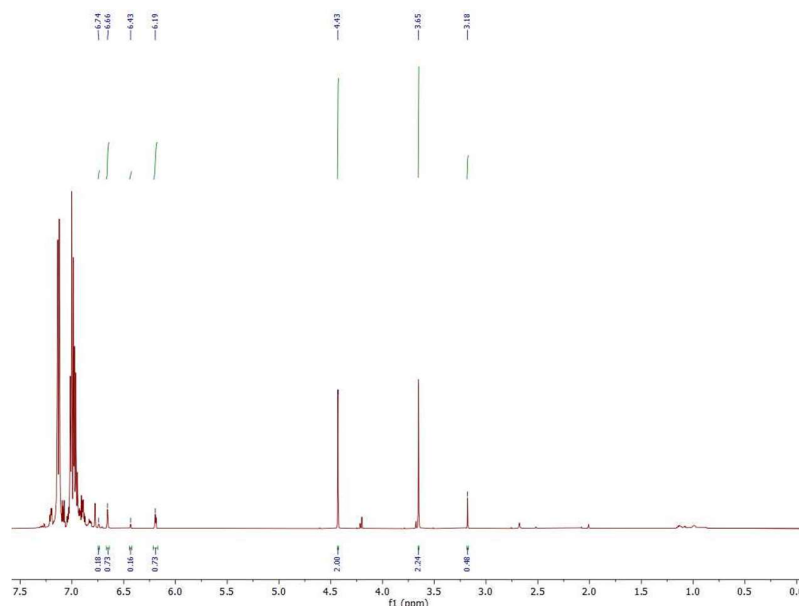

**Figure S21:** Borylation of N-Me-pyrrole using **5** in PhCl with CH<sub>2</sub>Br<sub>2</sub> internal standard as observed by <sup>1</sup>H NMR spectroscopy. Resonance at 4.43 ppm = CH<sub>2</sub>Br<sub>2</sub>



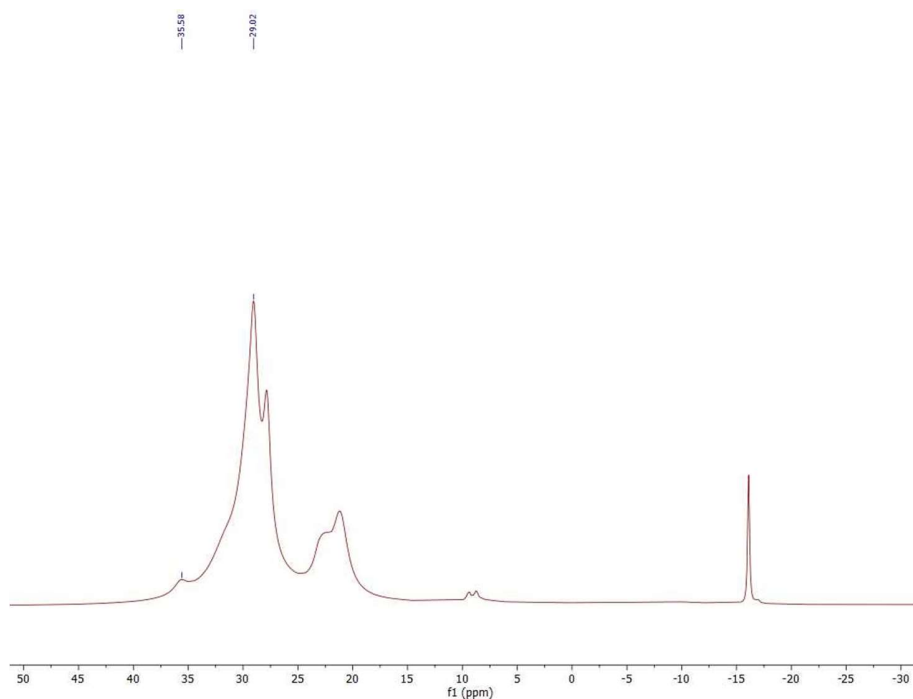

**Figure S22:** Borylation of N-Me-pyrrole using **5** in PhCl with  $\text{CH}_2\text{Br}_2$  internal standard as observed by  $^{11}\text{B}$  NMR spectroscopy.

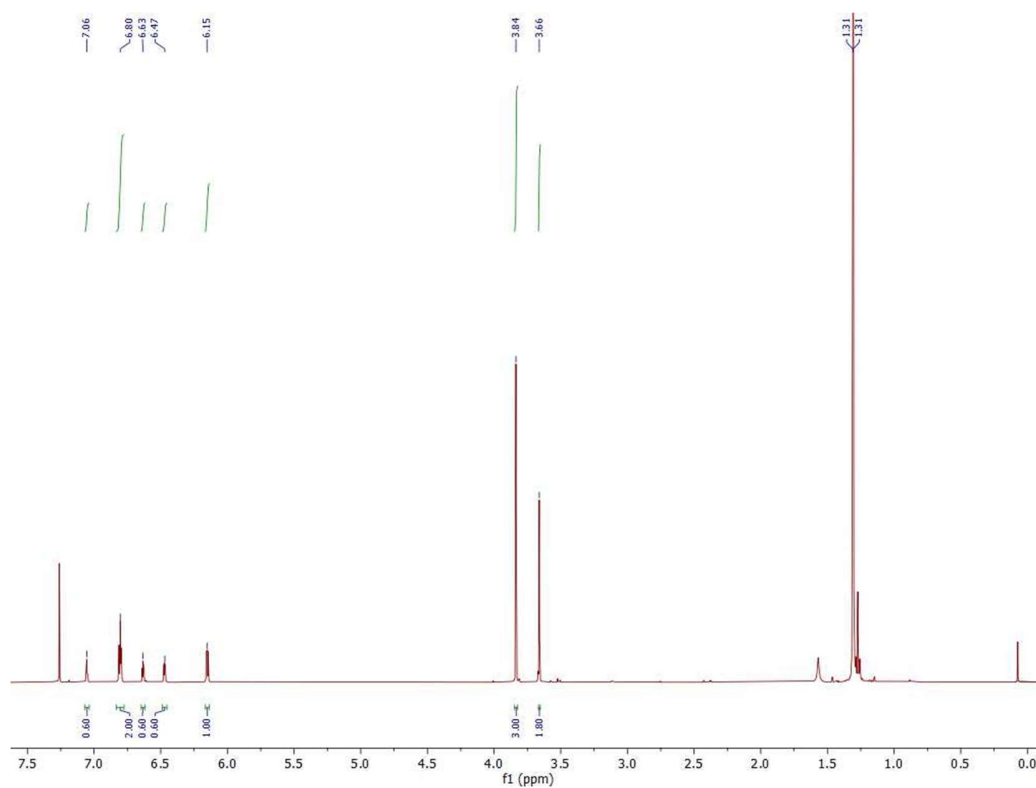

**Figure S23:**  $^1\text{H}$  NMR spectrum ( $\text{CDCl}_3$ ) of reaction mixture after pinacol protection/ partial work-up.

## Borylation of 2-methylthiophene

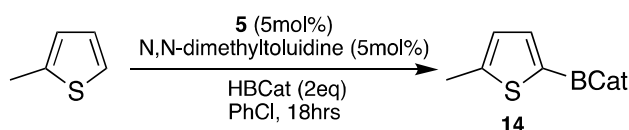

*Yield:* 45% (at 80 °C) or 74% (at 100 °C) by integration against dibromomethane as internal standard.

Product was synthesised according to general procedure C. Conversion to the boronic acid pinacol ester was achieved by drying of the reaction mixture *in vacuo* before dissolving in DCM (0.5 mL) and reacting with 1M solution of pinacol in NEt<sub>3</sub> (0.75 mL, 0.75mmol) for 18hrs at room temperature. The reaction mixture was then dried before extraction of the product with pentane (ca. 5 mL) and filtered through a short pad of silica rinsing with pentane (ca. 10 mL). The resulting filtrate was dried *in vacuo* and redissolved in CDCl<sub>3</sub> allowing confirmation of the initial product as 2-methyl-5-(1,3,2-benzodioxaborole)-thiophene by comparison of NMR data to previously reported literature.<sup>13</sup>

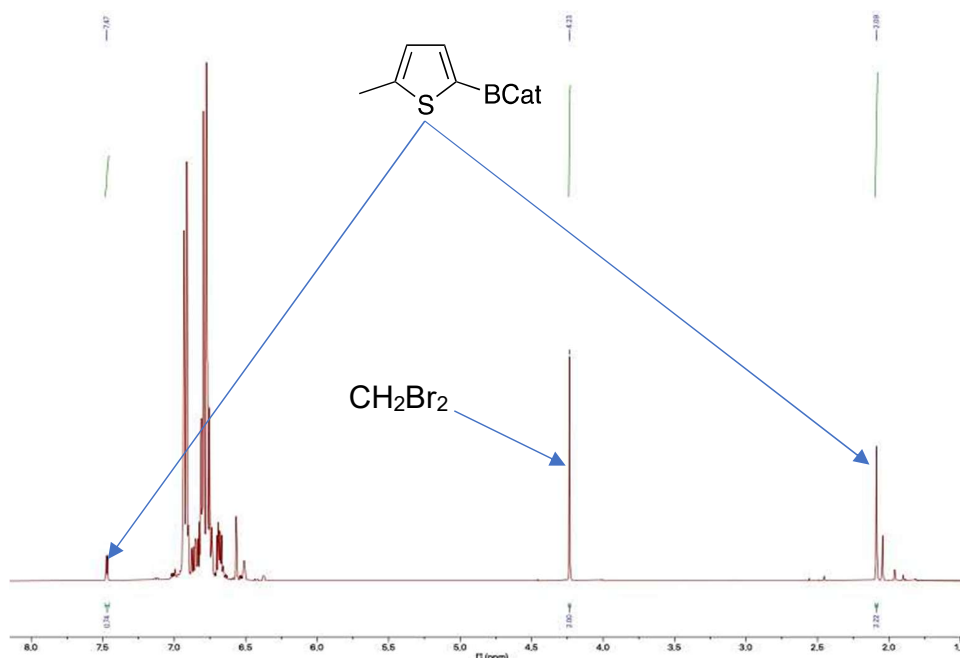

**Figure S24:** Borylation of 2-methylthiophene using **5** in PhCl with CH<sub>2</sub>Br<sub>2</sub> internal standard as observed by <sup>1</sup>H NMR spectroscopy.

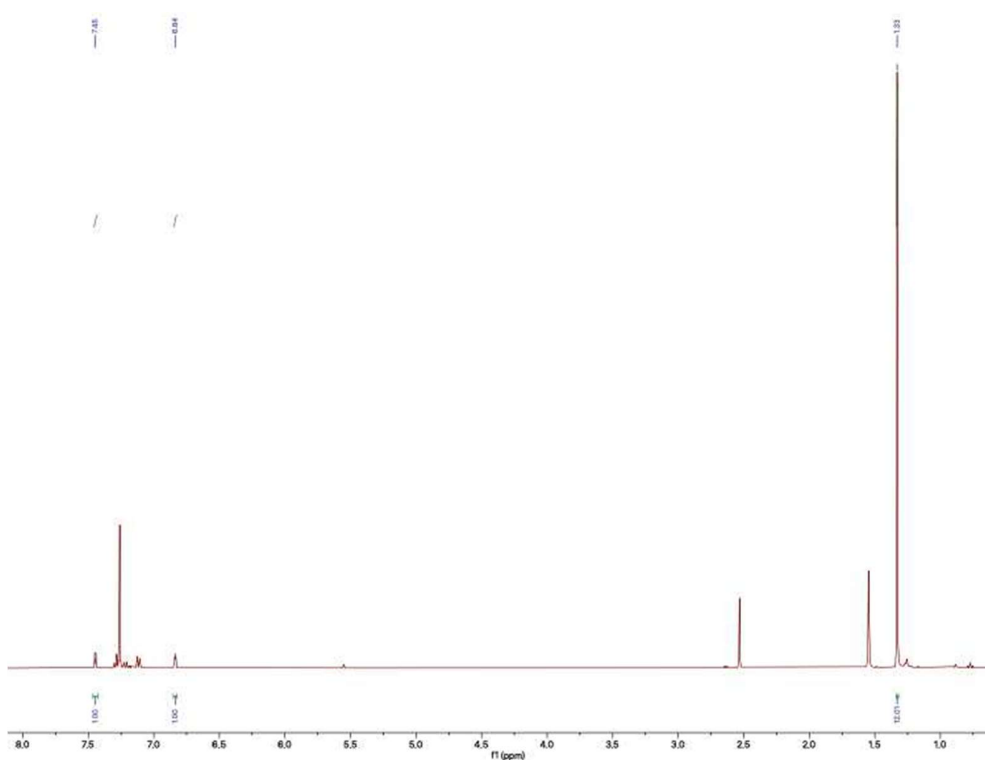

**Figure S25:** Reaction mixture after filtration post-pinacol esterification as observed by  $^1\text{H}$  NMR spectroscopy in  $\text{CDCl}_3$ .

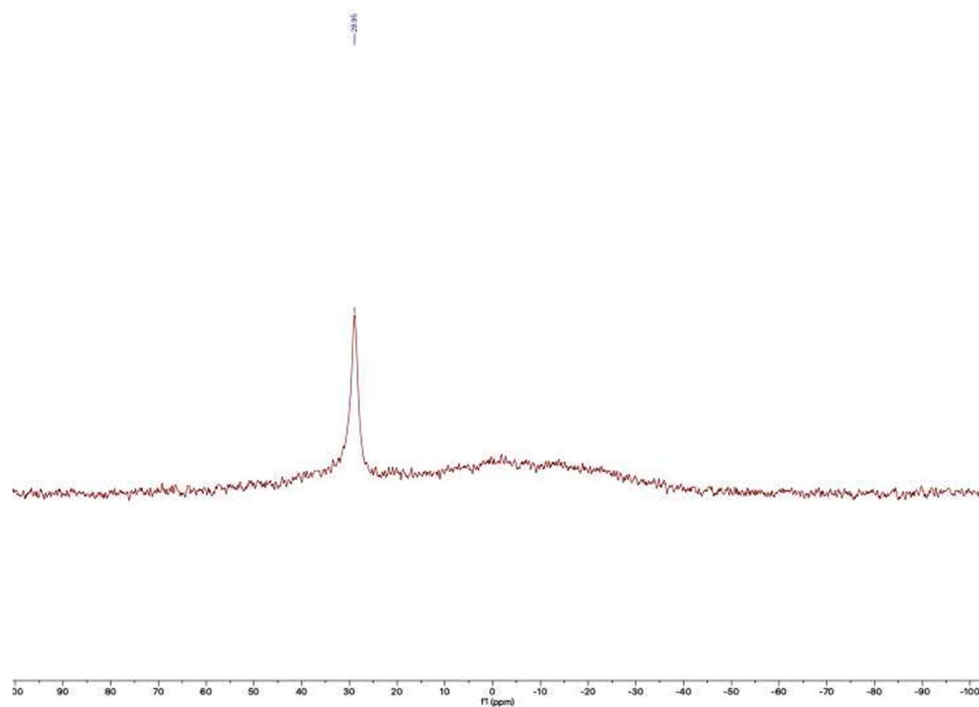

**Figure S26:** Reaction mixture after filtration post-pinacol esterification as observed by  $^{11}\text{B}$  NMR spectroscopy in  $\text{CDCl}_3$ .



## Borylation of 2-methylfuran

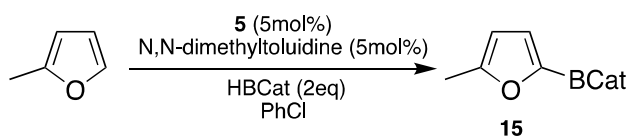

*Yield:* 55% (36hrs at 80°C) or 81% (18hrs at 100°C) by integration against dibromomethane as internal standard.

Product was synthesised according to general procedure C, volatiles were then removed and the crude solids were redissolved in CD<sub>2</sub>Cl<sub>2</sub> allowing confirmation of the product as 2-methyl-5-(1,3,2-benzodioxaborole)-furan by comparison of NMR data to previously reported literature.<sup>14</sup>

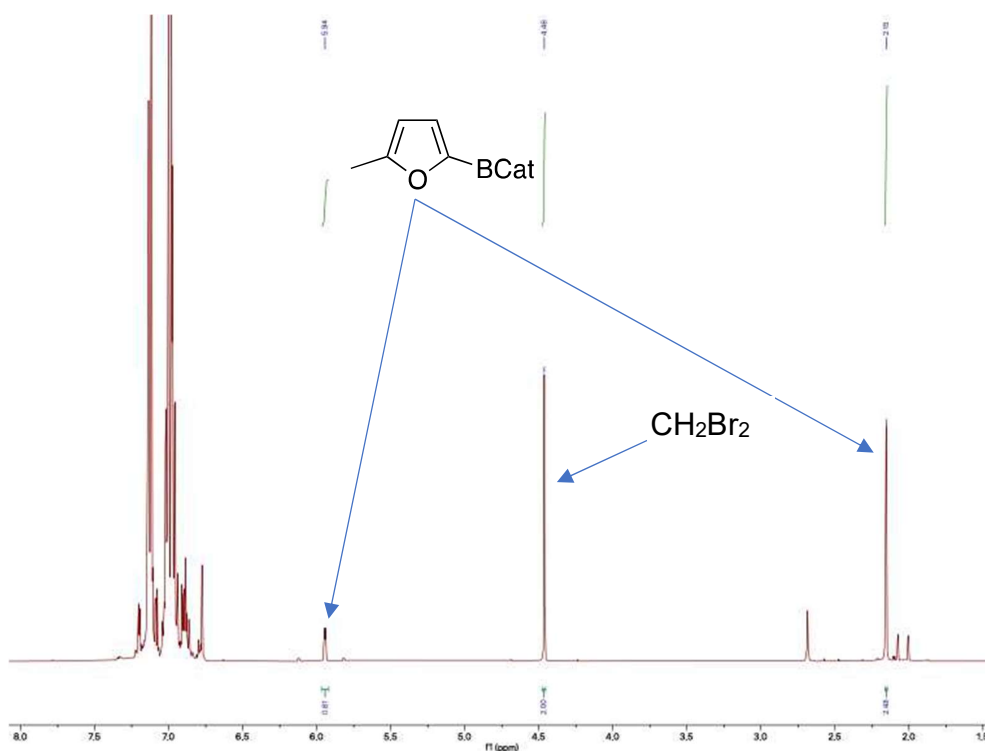

**Figure S29:** Borylation of 2-methylthiophene using **5** in PhCl with CH<sub>2</sub>Br<sub>2</sub> internal standard as observed by <sup>1</sup>H NMR spectroscopy.

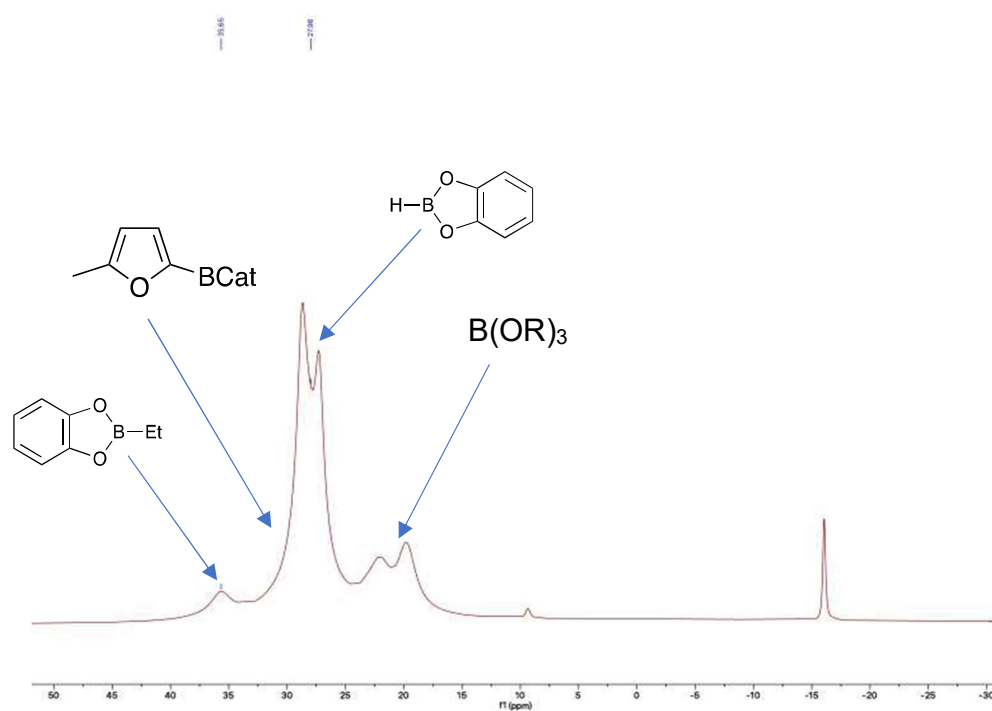

**Figure S30:** Borylation of 2-methylfuran using **5** in PhCl as observed by  $^{11}\text{B}$  NMR spectroscopy.

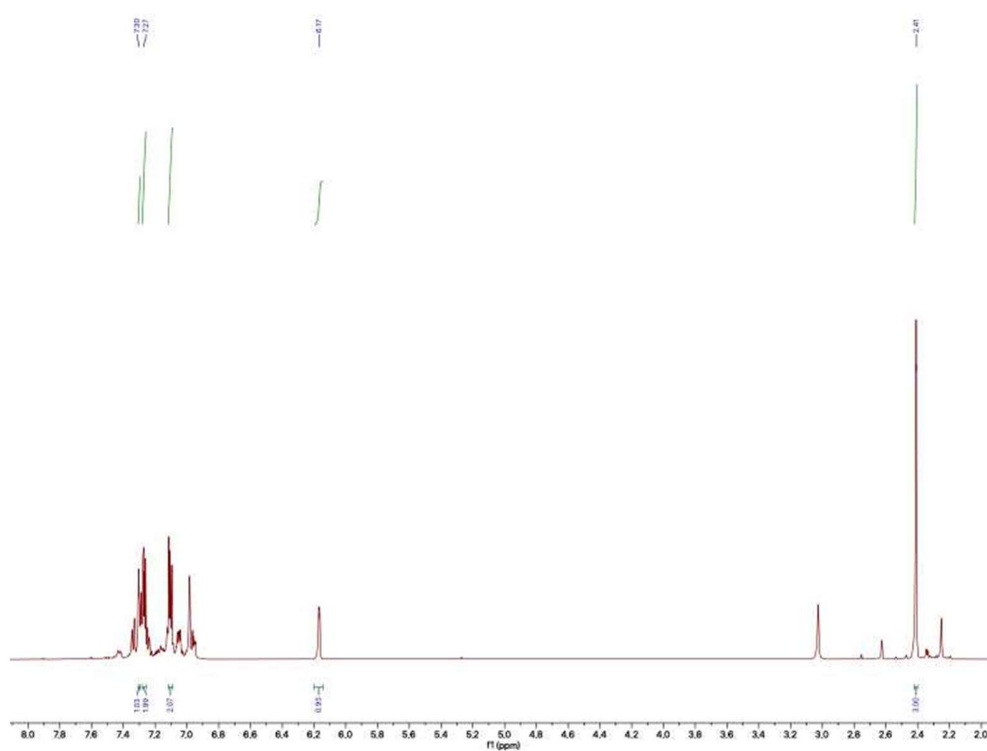

**Figure S31:** Crude reaction mixture of the borylation of 2-methylfuran using **5** in as observed by  $^1\text{H}$  NMR spectroscopy in  $\text{CDCl}_3$ .

## Borylation of thiophene

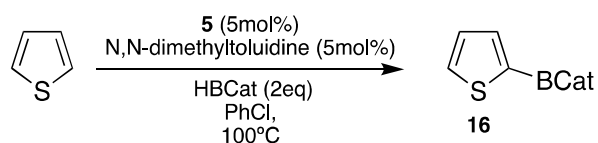

*Yield:* 22% (36hrs) or 51% (120hrs) confirmed by integration against dibromomethane as internal standard.

Product was synthesised according to general procedure C, before conversion to the boronic pinacol ester by drying of the reaction mixture *in vacuo* before solvation in DCM (0.5 mL) and reaction with 1M solution of pinacol in NEt<sub>3</sub> (0.75 mL) for 18hrs at room temperature. The reaction mixture was then dried and product was confirmed as 2-(4,4,5,5-tetramethyl-1,3,2-dioxaborolan-2-yl)-thiophene by comparison of NMR data to previously reported literature.<sup>15</sup>

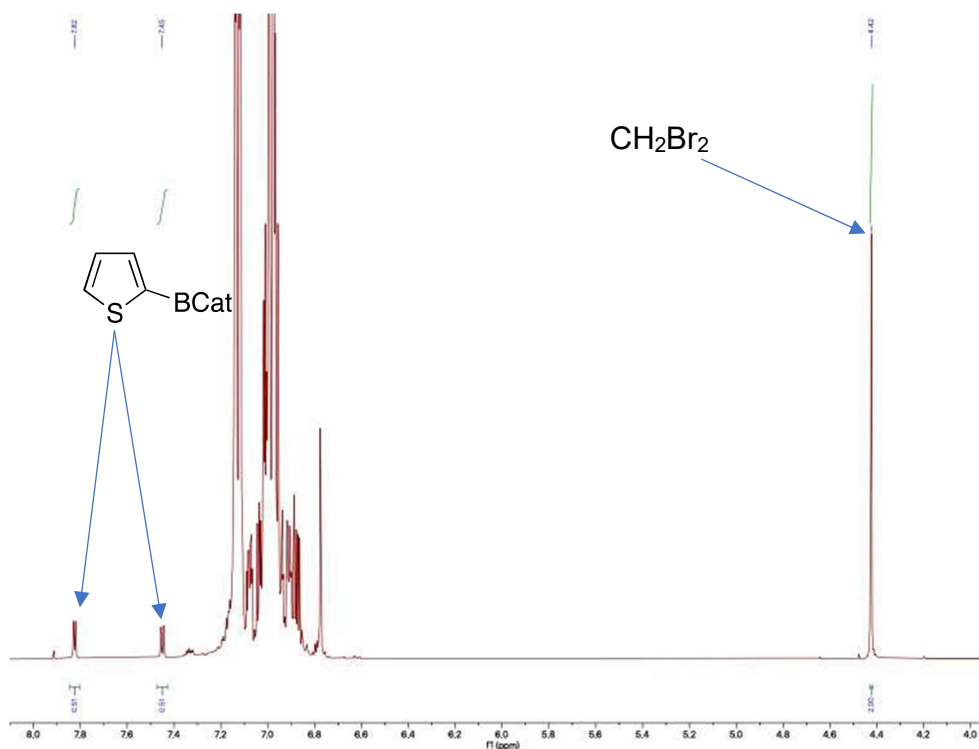

**Figure S32:** Borylation of thiophene using **5** in PhCl with CH<sub>2</sub>Br<sub>2</sub> internal standard as observed by <sup>1</sup>H NMR spectroscopy.

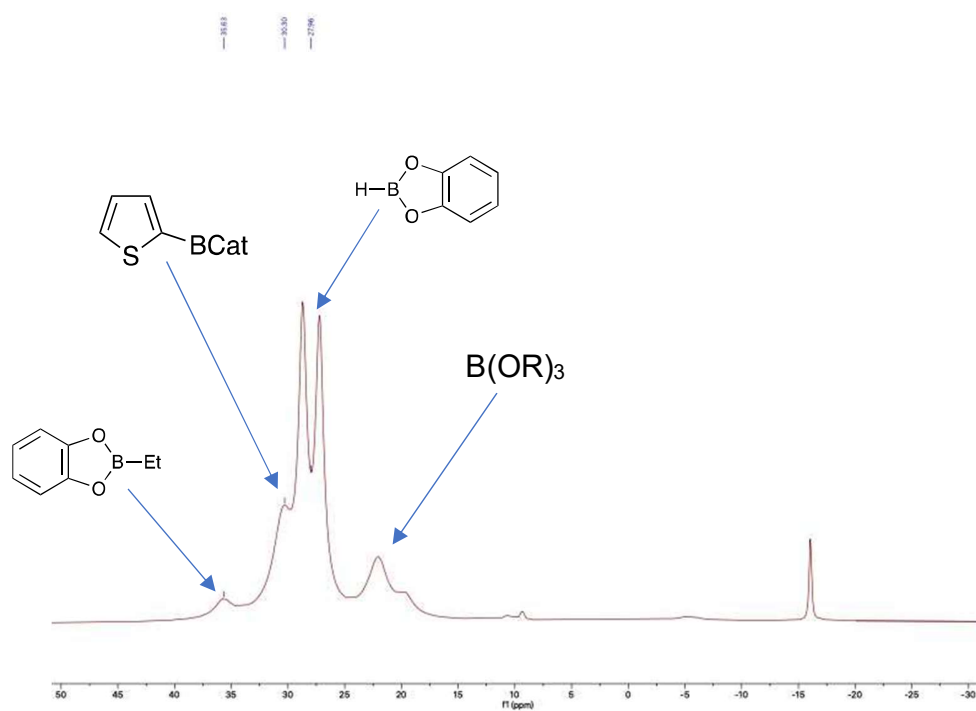

**Figure S33:** Borylation of thiophene using **5** in PhCl as observed by  $^{11}\text{B}$  NMR spectroscopy.

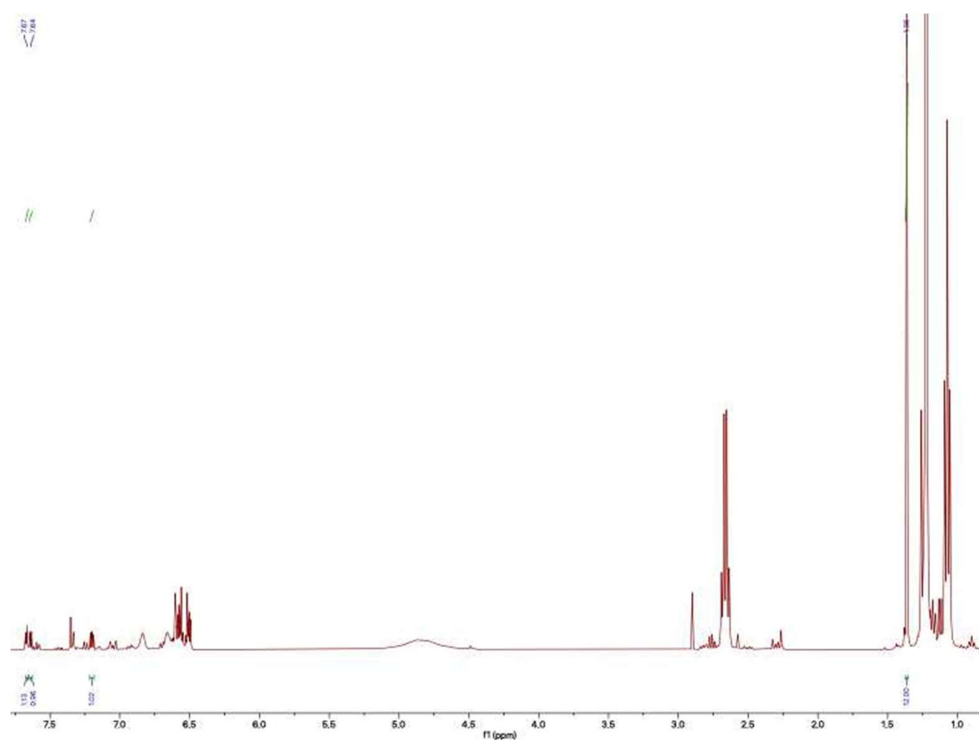

**Figure S34:** Crude reaction mixture post-pinacol esterification as observed by  $^1\text{H}$  NMR spectroscopy in  $\text{CDCl}_3$ .



## S4. Investigation of potential “Trojan horse” catalysts

### S4.1 [IDippBPin][B(C<sub>6</sub>F<sub>5</sub>)<sub>4</sub>] (**8**) as a catalyst

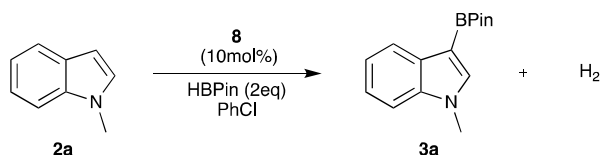

#### Synthesis of **8** *in-situ*:

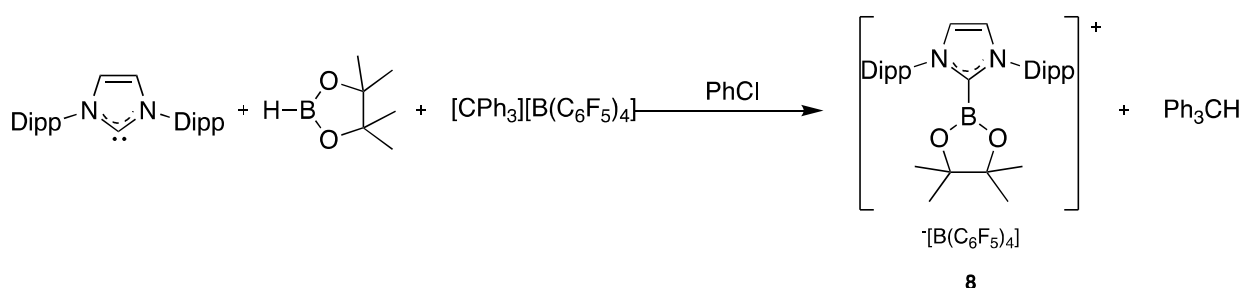

A J Young's NMR tube was charged with IDipp carbene (26 mg, 67  $\mu$ mol), the solid was then dissolved in PhCl (500  $\mu$ L) before addition of HBPIn (10  $\mu$ L, 67  $\mu$ mol), analysis by <sup>1</sup>H and <sup>11</sup>B NMR showed clean production of an adduct (**Figures S35-36**), consistent with previous work.<sup>16</sup> In a separate J Young's ampoule [CPh<sub>3</sub>][B(C<sub>6</sub>F<sub>5</sub>)<sub>4</sub>] (62 mg, 67  $\mu$ mol) was dissolved in PhCl (ca. 200  $\mu$ L) before addition to the reaction mixture, analysis by <sup>1</sup>H and <sup>11</sup>B NMR spectroscopy showed production of the NHC-borenium species.<sup>17</sup> The catalytic reaction was then conducted by addition of HBPIn (195  $\mu$ L, 1.34 mmol) and **2a** (84  $\mu$ L, 0.67 mmol) before heating at 80 °C, analysis of the reaction mixture after 18 hours by <sup>1</sup>H and <sup>11</sup>B NMR spectroscopy showed no conversion of substrate.

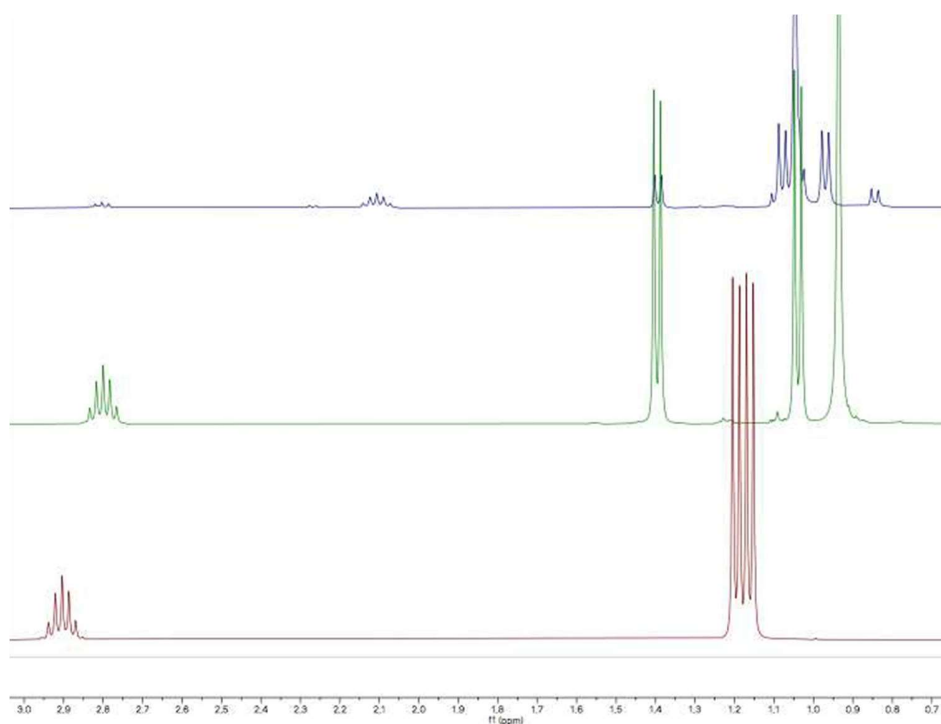

**Figure S35:** Stacked  $^1\text{H}$  NMR spectra of the *in-situ* production of **8**. IDipp in PhCl (red). IDipp + HBPIn in PhCl (green). IDipp + HBPIn +  $[\text{CPh}_3][\text{B}(\text{C}_6\text{F}_5)_4]$  in PhCl (blue).

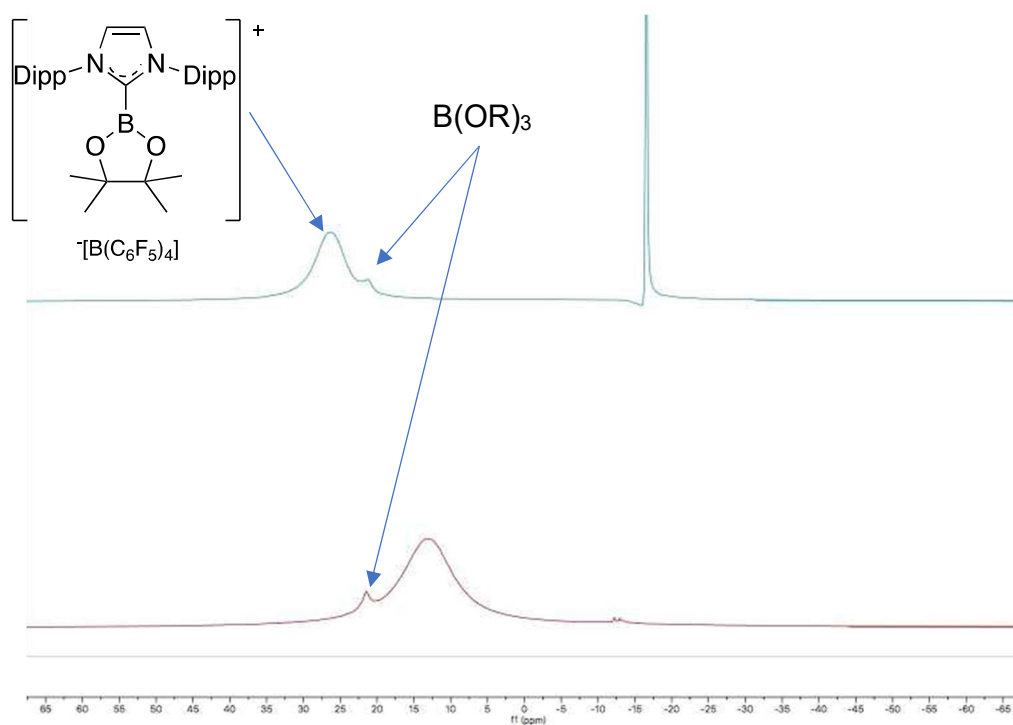

**Figure S36:** Stacked  $^{11}\text{B}$  NMR spectra of the *in-situ* production of **8**. IDipp + HBPIn in PhCl (red). IDipp + HBPIn +  $[\text{CPh}_3][\text{B}(\text{C}_6\text{F}_5)_4]$  in PhCl (turquoise).

#### S4.2 IDipp as a catalyst

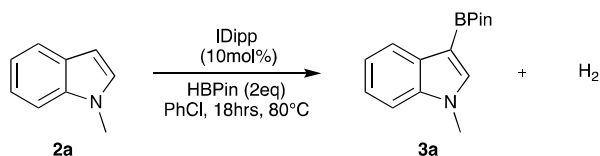

A J Youngs NMR tube was charged with solid IDipp (20 mg, 0.05 mmol), the solid was then dissolved in PhCl (500  $\mu$ L) before addition of HBPIn (145  $\mu$ L, 1.00 mmol) and **2a** (63  $\mu$ L, 0.50 mmol). The reaction was then heated to 80 °C, analysis of the reaction mixture after 18 hours by <sup>1</sup>H and <sup>11</sup>B NMR spectroscopy showed no conversion of substrate.

#### S4.3 BH<sub>3</sub>•THF as a catalyst

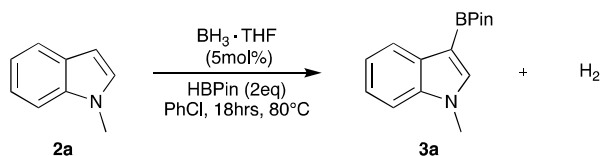

BH<sub>3</sub>•THF (25  $\mu$ L, 1.0 M, 0.025 mmol) was added to a J Youngs tube followed by PhCl (500  $\mu$ L), HBPIn (145  $\mu$ L, 1.00 mmol) and **2a** (63  $\mu$ L, 0.50 mmol). The reaction was then heated to 80 °C, analysis of the reaction mixture after 18 hours by <sup>1</sup>H and <sup>11</sup>B NMR spectroscopy showed no conversion of substrate.

#### S4.4 Zn(C<sub>6</sub>F<sub>5</sub>)<sub>2</sub> as a catalyst

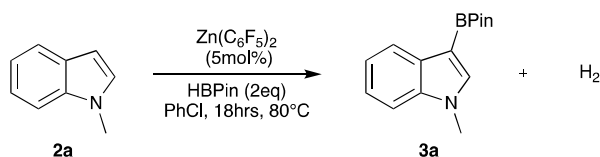

A J Youngs NMR tube was charged with Zn(C<sub>6</sub>F<sub>5</sub>)<sub>2</sub> (10 mg, 0.25 mmol), the solid was then dissolved in PhCl (500  $\mu$ L) before addition of HBPIn (145  $\mu$ L, 1.00 mmol) and **2a** (63  $\mu$ L, 0.50 mmol). Shortly after addition of the reactants a white precipitate deposited at the bottom of the tube. The reaction was then heated to 80 °C for 18 hours, analysis by <sup>1</sup>H, <sup>11</sup>B and <sup>19</sup>F NMR spectroscopy showed no conversion of substrate, consumption of Zn(C<sub>6</sub>F<sub>5</sub>)<sub>2</sub> and formation of PinB-C<sub>6</sub>F<sub>5</sub>.

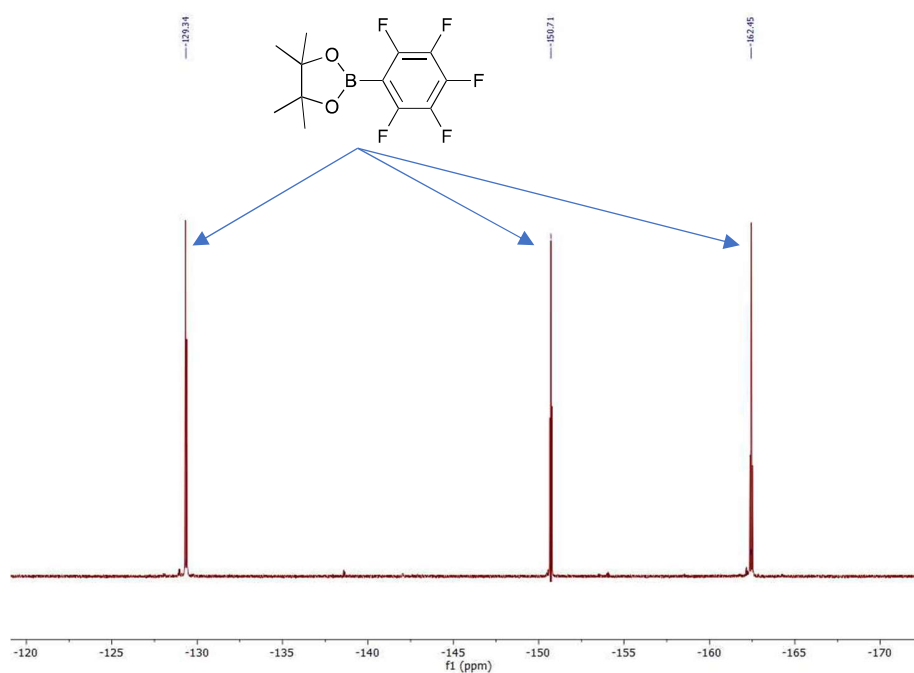

**Figure S37:** Attempted borylation of **2a** using  $\text{Zn}(\text{C}_6\text{F}_5)_2$ , metathesis observed by  $^{19}\text{F}$  NMR spectroscopy.

## S5. Metathesis studies

### S5.1 Zn-Et/H-BPin metathesis

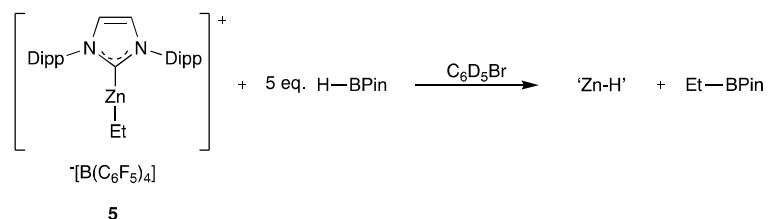

A J Young's NMR tube was charged with **5** (29 mg, 0.025 mmol), the solid was then dissolved in C<sub>6</sub>D<sub>5</sub>Br (500 μL) before addition of HBPIn (18 μL, 0.125 mmol, 5eq.). The reaction was analysed by <sup>1</sup>H NMR spectroscopy upon addition of HBPIn, after 24 hrs at room temperature and 1 week at room temperature. Isolation of a [IDippZnH][B(C<sub>6</sub>F<sub>5</sub>)<sub>4</sub>] proved elusive in our hands despite multiple attempts at crystallisation.

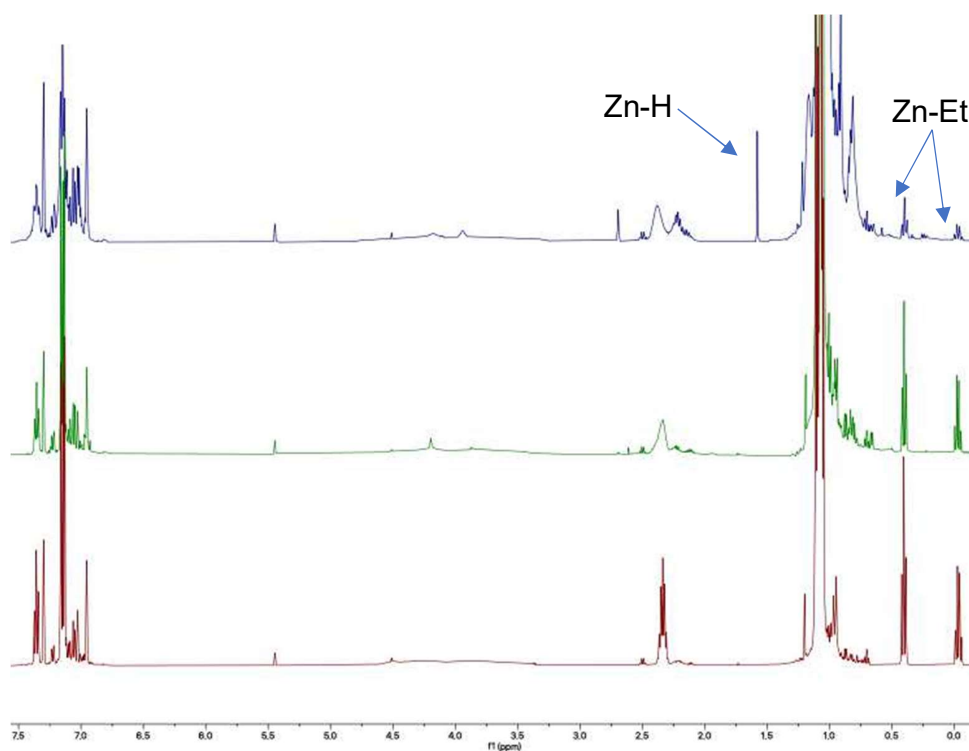

**Figure S38:** Stacked <sup>1</sup>H NMR spectra of the reaction between **5** and HBPIn in C<sub>6</sub>D<sub>5</sub>Br. Immediately after addition of HBPIn (red). After 24 hours at room temperature (green). After 1 week at room temperature (blue).

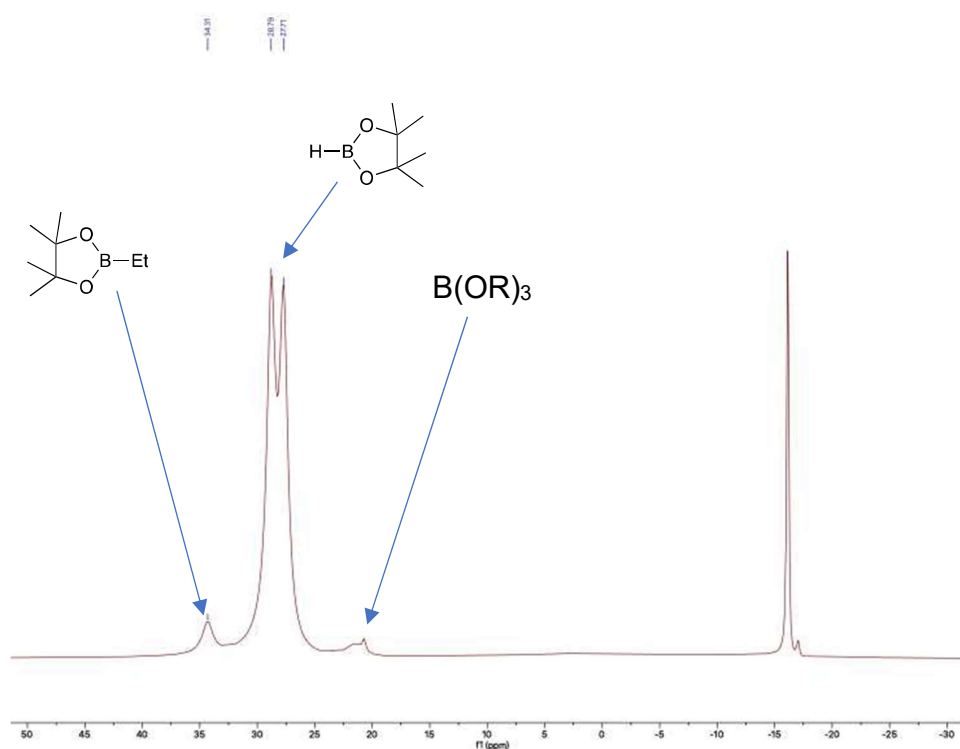

**Figure S39:**  $^{11}\text{B}$  NMR spectrum of the reaction between **5** and HBPIn in  $\text{C}_6\text{D}_5\text{Br}$  after 24 hours at room temperature.

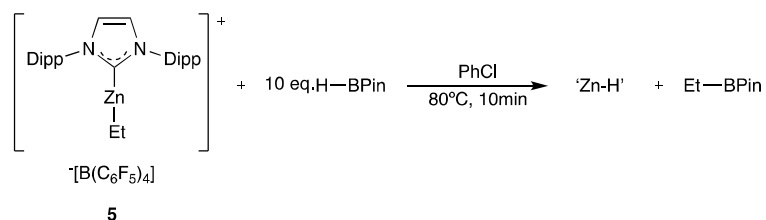

A J Young's NMR tube was charged with **5** (29 mg, 0.025 mmol), the solid was then dissolved in PhCl (500  $\mu\text{L}$ ) before addition of HBPIn (36  $\mu\text{L}$ , 0.25 mmol, 10eq.), the reaction was then heated at 80  $^\circ\text{C}$  for 10 minutes and analysed by  $^{11}\text{B}$  NMR spectroscopy.

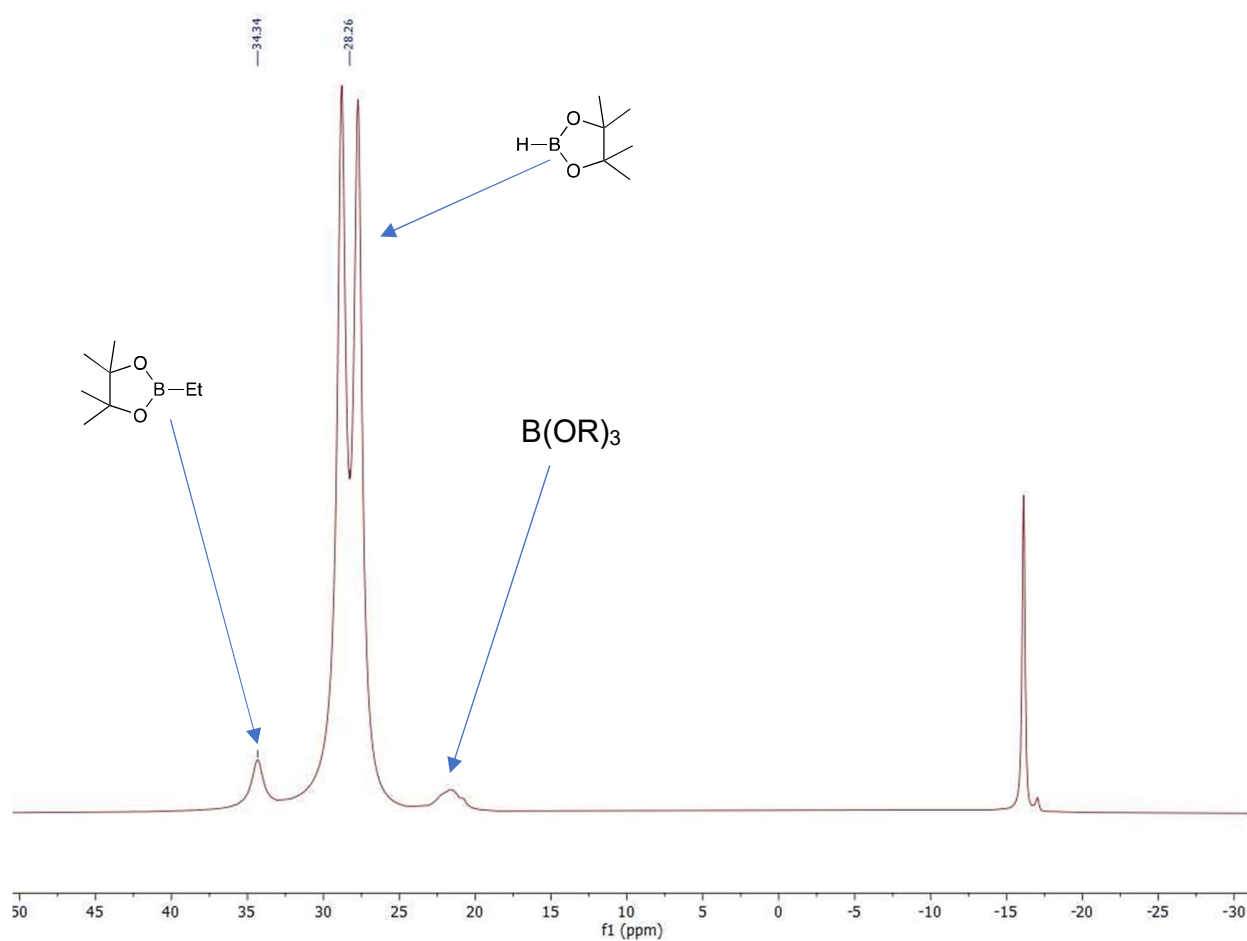

**Figure S40:** Reaction between **5** and HBPIn after 10 mins at 80 °C as observed by  $^{11}\text{B}$  NMR spectroscopy.

### Mass spectrometry analysis of reaction mixture

A J Young's NMR tube was charged with **5** (29 mg, 0.025 mmol), the solid was then dissolved in PhCl (500  $\mu\text{L}$ ) before addition of HBPIn (18  $\mu\text{L}$ , 0.125 mmol, 5eq.). This was then left for 4 days at room temperature before analysis by mass spectrometry using electrospray ionisation where  $[\text{IDippZnH}(\text{H}_2\text{O})]^+$ , Calculated  $[\text{M}^+]$ : 471.24, Observed  $[\text{M}^+]$ : 471.3 was observed. Peaks for solvent free or oligomeric NHCZn products were not observed.

## S5.2 Zn-Et/D-BPin metathesis

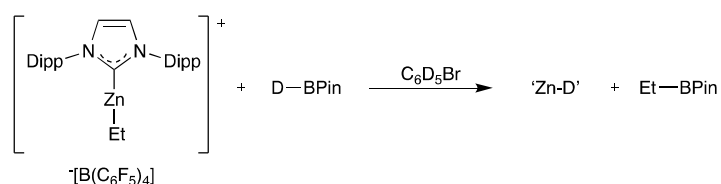

A J Young's NMR tube was charged with **5** (29 mg, 0.025 mmol), the solid was then dissolved in PhCl (500  $\mu\text{L}$ ) before addition of DBPin (3.7  $\mu\text{L}$ , 0.025 mmol, 1eq.). The reaction was analysed by  $^1\text{H}$  NMR spectroscopy after 24 hrs and 1 week at room temperature, an additional equivalent of DBPin (3.7  $\mu\text{L}$ , 0.025 mmol) was then added and the reaction analysed by  $^1\text{H}$  NMR spectroscopy after a further 3 weeks at room temperature. Isolation of a  $[\text{NHCZnD}][\text{B}(\text{C}_6\text{F}_5)_4]$  species proved elusive in our hands.

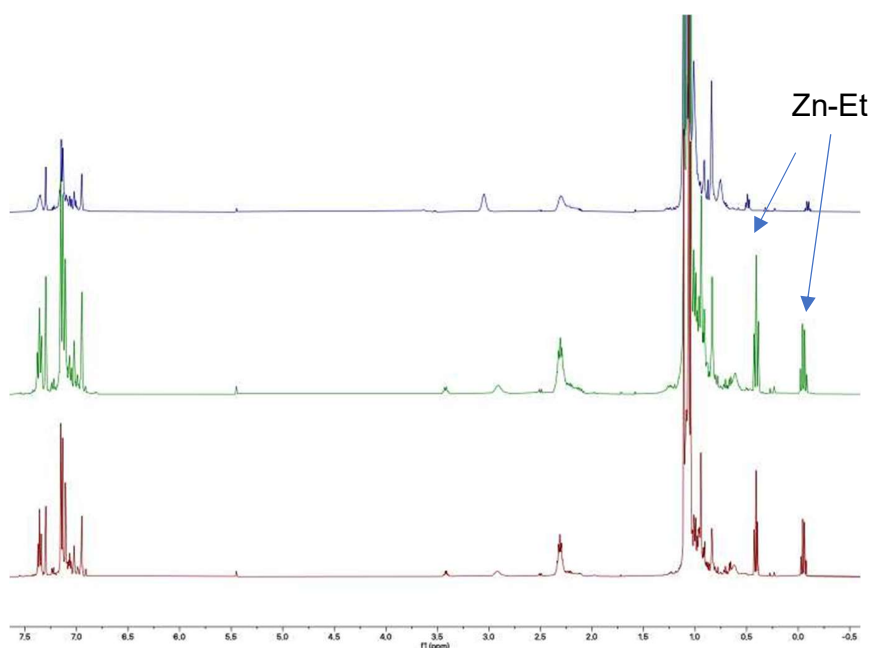

**Figure S41:** Stacked  $^1\text{H}$  NMR spectra of the reaction between **5** and DBPin in  $\text{C}_6\text{D}_5\text{Br}$ . After 24 hours at room temperature (red). After 1 week at room temperature (green). 3 weeks after addition of 2<sup>nd</sup> equivalent of DBPin (blue).



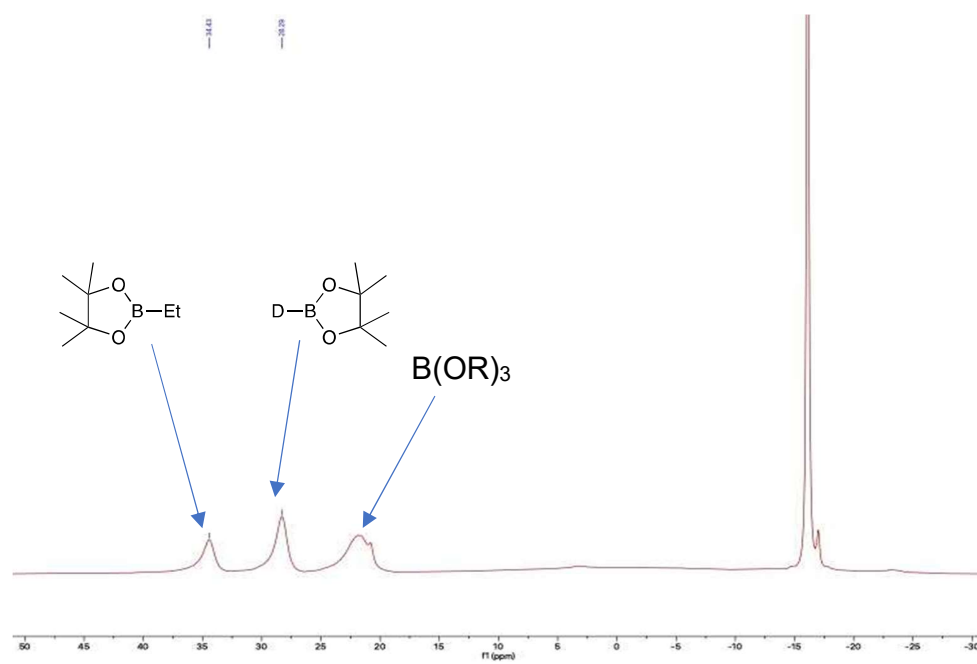

**Figure S42:**  $^{11}\text{B}$  NMR spectrum of the reaction between **5** and DBPin in  $\text{C}_6\text{D}_5\text{Br}$  after 24 hours at room temperature.

### S5.3 Zn-Et/H-BCat metathesis

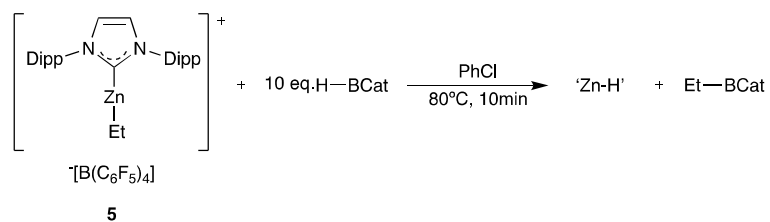

A J Young's NMR tube was charged with **5** (29 mg, 0.025 mmol), the solid was then dissolved in PhCl (500  $\mu$ L) before addition of HBCat (26  $\mu$ L, 0.25 mmol, 10eq.), the reaction was then heated at 80  $^\circ$ C for 10 minutes and analysed by <sup>11</sup>B NMR spectroscopy.

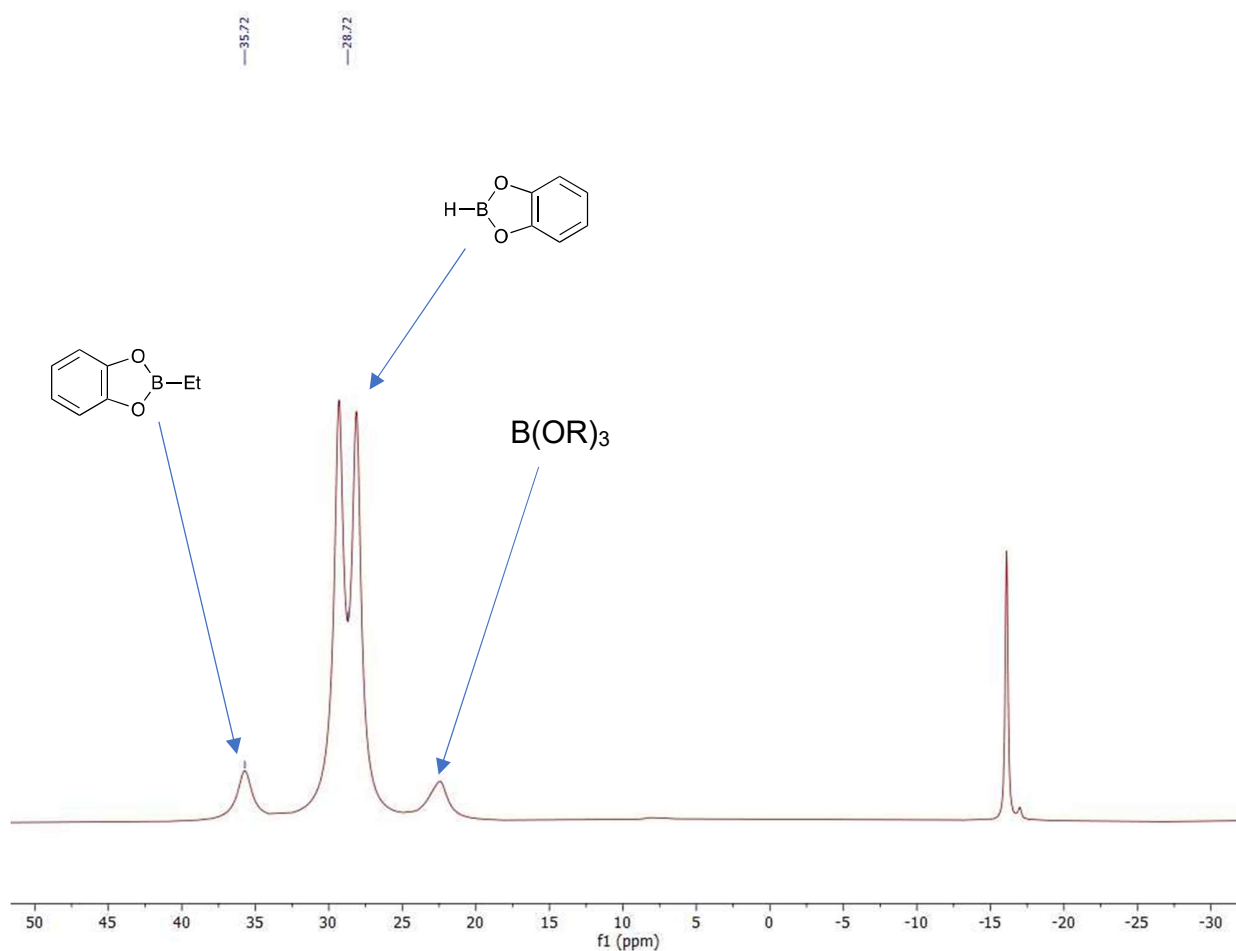

**Figure S43:** Reaction between **5** and HBCat after 10 mins at 80  $^\circ$ C as observed by <sup>11</sup>B NMR spectroscopy.

## S5.4 Zn-Et/H-9BBN metathesis

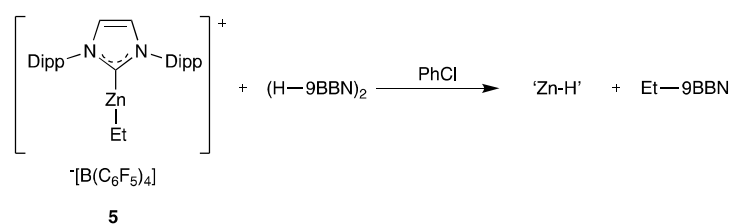

A J Young's NMR tube was charged with **5** (29 mg, 0.025 mmol), the solid was then dissolved in PhCl (500  $\mu$ L) before addition of HBBN (6.1 mg, 0.025 mmol, 1eq.). The reaction was analysed by  $^1\text{H}$  NMR spectroscopy after addition of HBBN and 24 hours at room temperature, an additional equivalent of HBBN (6.1 mg, 0.025mmol, 1eq.) was then added and the reaction analysed by  $^1\text{H}$  NMR spectroscopy after a further week at room temperature. Isolation of a  $[\text{DippZnH}][\text{B}(\text{C}_6\text{F}_5)_4]$  from these reaction mixtures proved elusive in our hands.

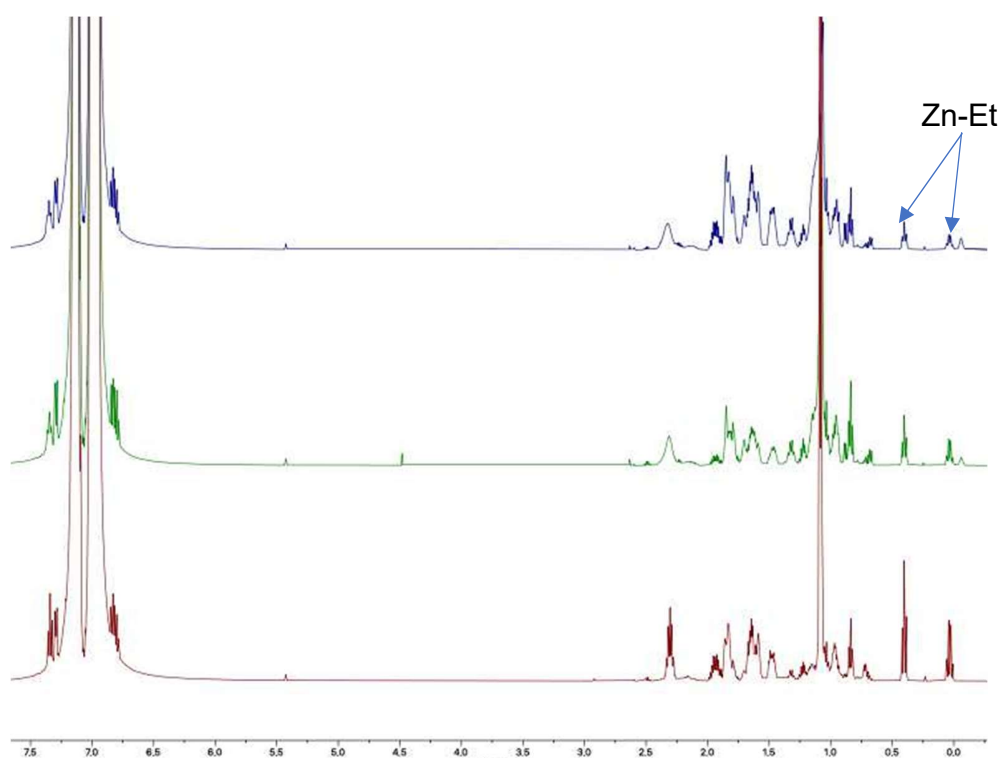

**Figure S44:** Stacked  $^1\text{H}$  NMR spectra of the reaction between **5** and HBBN in  $\text{C}_6\text{D}_5\text{Br}$ . Immediately after addition of HBBN (red). After 24 hours at room temperature (green). 1 week after addition of 2<sup>nd</sup> equivalent of HBBN (blue).

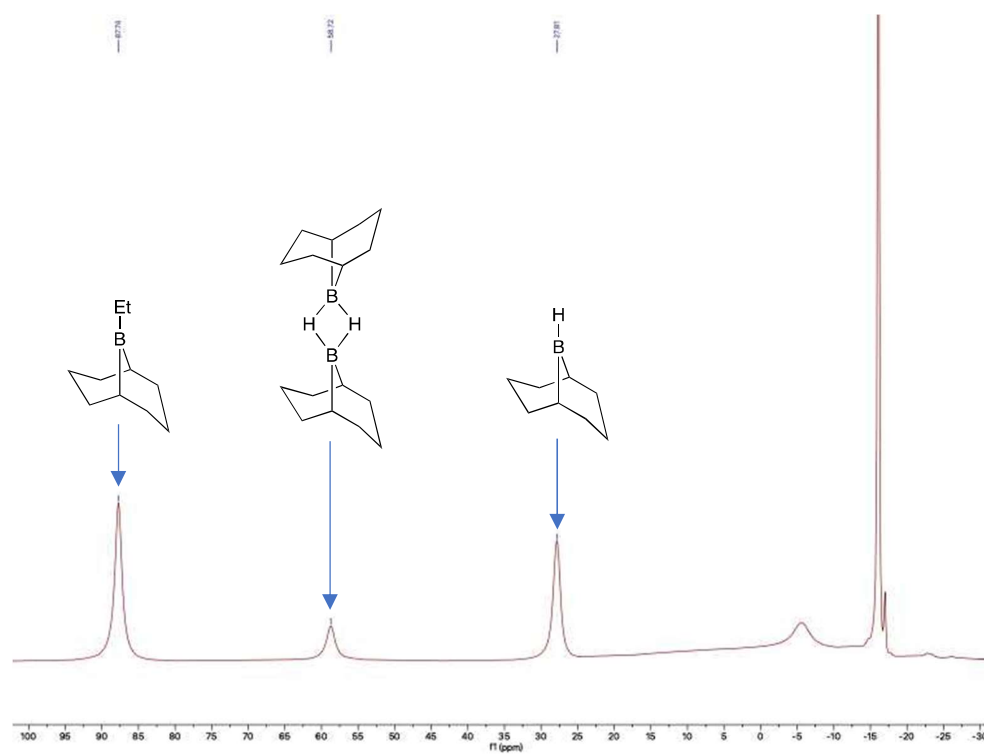

**Figure S45:**  $^{11}\text{B}$  NMR spectrum of the reaction between **5** and HBBN in PhCl after 24 hours at room temperature.

### S5.5 Attempted indole metalation with **1-H**

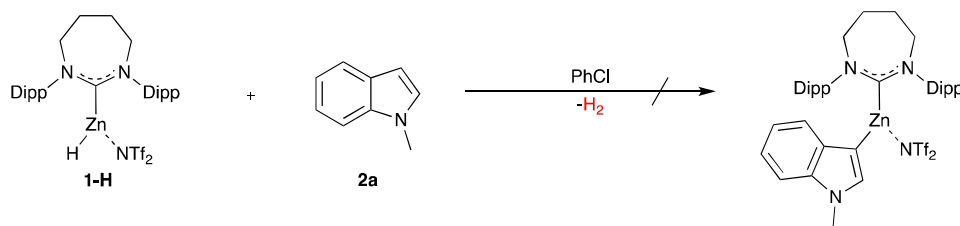

A J Young's NMR tube was charged with 7DippZnH(NTf<sub>2</sub>) (**1-H**) (19 mg, 0.025 mmol), the solid was then dissolved in PhCl (500  $\mu$ L) aided by sonication at room temperature before addition of **2a** (3.1  $\mu$ L, 0.025 mmol). Analysis by <sup>1</sup>H NMR spectroscopy showed no reaction after heating at 60 °C for 1 hour. The temperature was then increased to 100 °C in line with the catalytic conditions for **1-Ph**, however no reaction was observed by <sup>1</sup>H NMR spectroscopy after 24 hours.

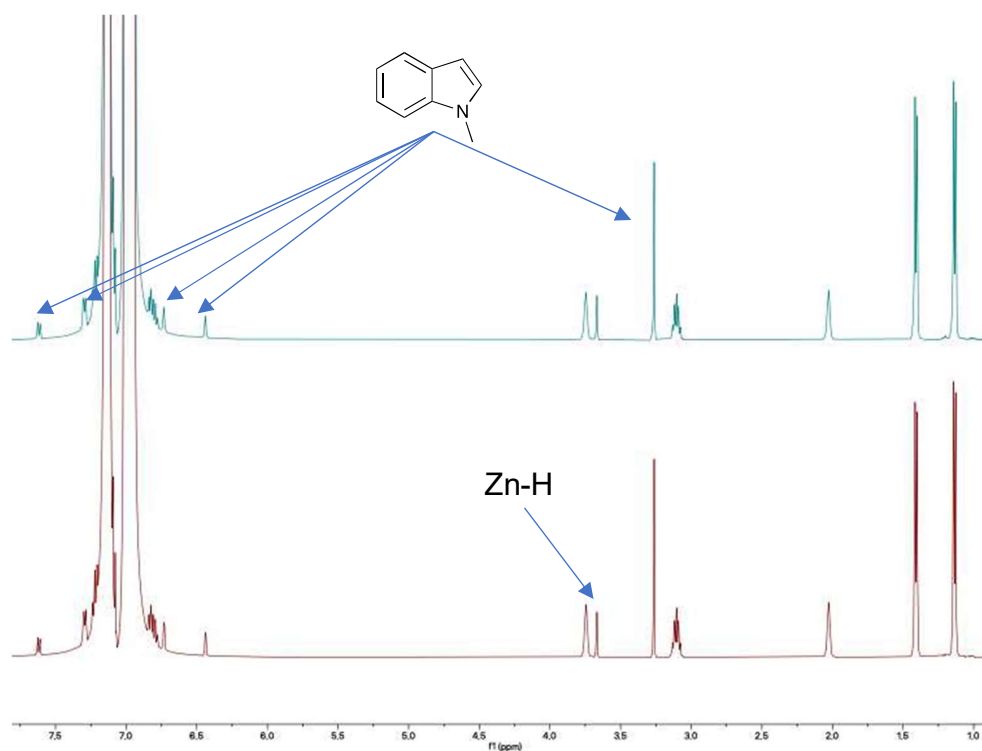

**Figure S46:** Stacked <sup>1</sup>H NMR spectra of the reaction between **1-H** and N-Me-indole in PhCl. Immediately after addition of N-Me-indole (red). After 24 hours at 100 °C (green).

## S5.6 Zn-C<sub>6</sub>F<sub>5</sub> / H-BPin metathesis under catalytic conditions

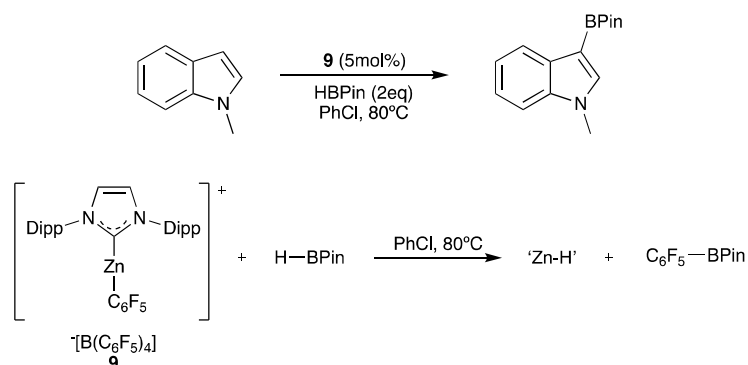

A J Young's NMR tube was charged with **9** (32 mg, 0.025 mmol), the solid was then dissolved in PhCl (500  $\mu\text{L}$ ) before addition of H-BPin (18  $\mu\text{L}$ , 0.125 mmol, 5eq.). The reaction was then heated at 80  $^\circ\text{C}$ , the N-Me-indole borylation and Zn-C<sub>6</sub>F<sub>5</sub>/H-BPin metathesis reactions were then monitored periodically by <sup>1</sup>H and <sup>19</sup>F NMR spectroscopy respectively (**Table S4**).

**Table S4** – Conversion of substrate and % of metathesis by-product at various time intervals during catalytic C-H borylation of N-Me-indole by **9**.

| Time/hrs | Conversion of substrate / % <sup>a</sup> | % PinB-C <sub>6</sub> F <sub>5</sub> <sup>b</sup> |
|----------|------------------------------------------|---------------------------------------------------|
| 1        | 13                                       | 1                                                 |
| 4        | 26                                       | 2                                                 |
| 12       | 57                                       | 4                                                 |
| 15       | 65                                       | 5                                                 |
| 18       | 72                                       | 6                                                 |

[a]: determined *in-situ* by <sup>1</sup>H NMR spectroscopy. [b]: determined *in-situ* by <sup>19</sup>F NMR spectroscopy.

## S5.7 Zn-C<sub>6</sub>F<sub>5</sub> / H-BCat metathesis

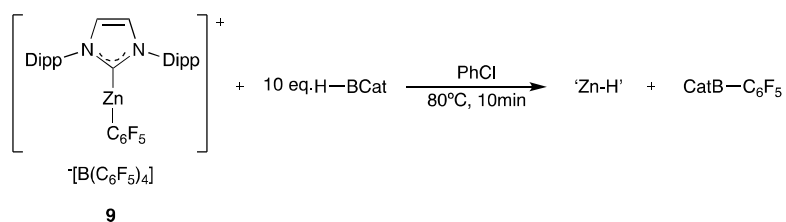

A J Young's NMR tube was charged with **9** (32 mg, 25 μmmol), the solid was then dissolved in PhCl (500 μL) before addition of HBCat (26 μL, 0.25 mmol, 10eq.), the reaction was then heated at 80 °C for 10 minutes and analysed by <sup>19</sup>F NMR spectroscopy.

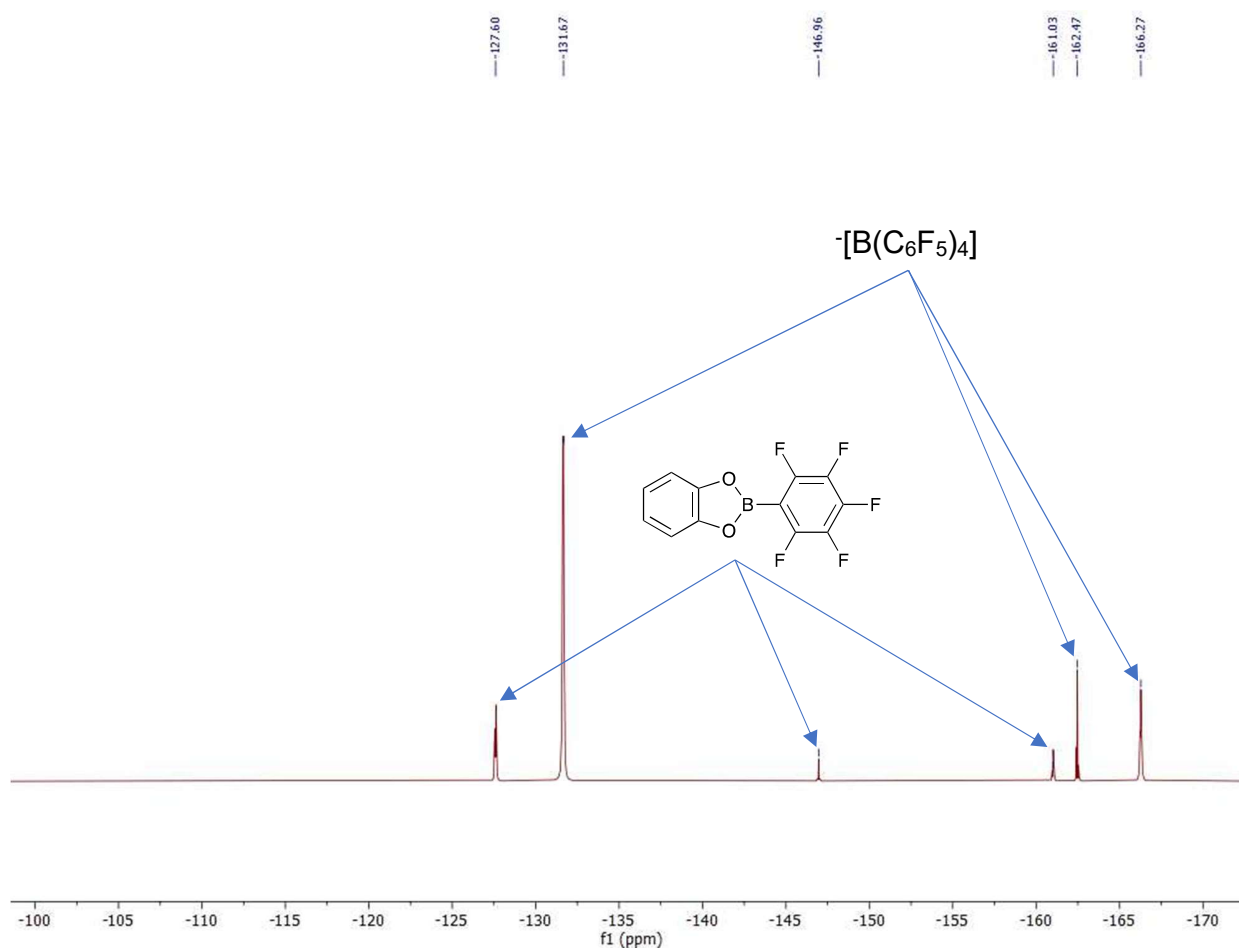

**Figure S47:** Reaction between **9** and HBCat after 10 mins at 80 °C as observed by <sup>11</sup>B NMR spectroscopy.

## S6. [IDippZnEt][B(C<sub>6</sub>F<sub>5</sub>)<sub>4</sub>] / DMT study

### S6.1 [IDippZnEt-(DMT)<sub>x</sub>][B(C<sub>6</sub>F<sub>5</sub>)<sub>4</sub>] adduct

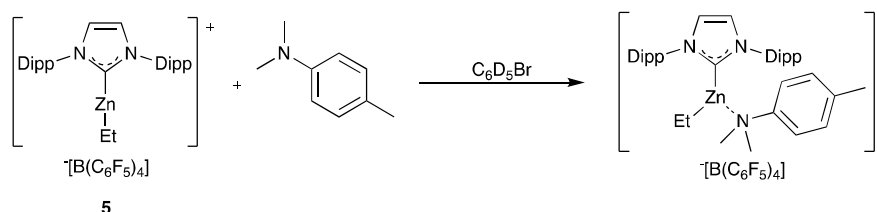

A J Young's NMR tube was charged with **5** (29 mg, 0.025 mmol, 1eq.) this was then dissolved in *d*<sub>5</sub>-bromobenzene (500 μL) before addition of *N,N*-dimethyl-*p*-toluidine (2.0 μL, ca. 0.5 eq.) and analysis by <sup>1</sup>H NMR spectroscopy, two subsequent portions of *N,N*-dimethyl-*p*-toluidine (4.0 μL, ca. 1 eq.) were added with <sup>1</sup>H NMR measurements taken after each addition. Repeated attempts to isolate the product and to observe the adduct by air sensitive mass spectrometry using electrospray ionisation proved unsuccessful in our hands.

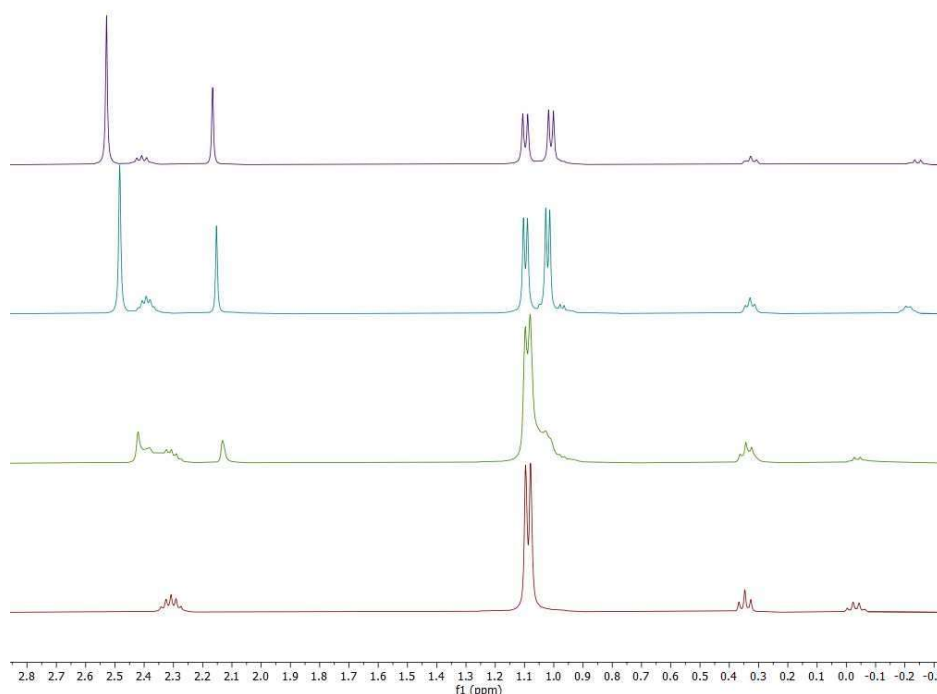

**Figure S48:** Stacked <sup>1</sup>H NMR spectra of **5** in C<sub>6</sub>D<sub>5</sub>Br. Prior to the addition of DMT (red). After addition of 0.5 eq. DMT (green). After addition of 1.5 eq. DMT (blue). After addition of 2 eq. DMT (purple).



## S6.2 HBPIn metathesis of [IDippZnEt-(DMT)<sub>x</sub>][B(C<sub>6</sub>F<sub>5</sub>)<sub>4</sub>]

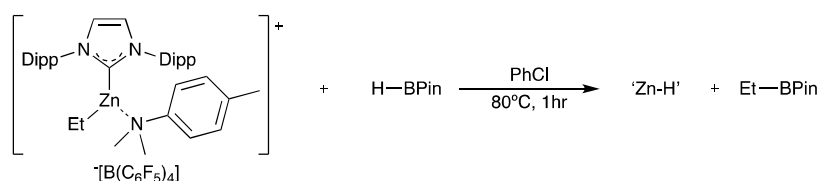

A J Young's NMR tube was charged with **5** (29 mg, 0.025 mmol, 1eq.) this was then dissolved in PhCl (500  $\mu$ L) before addition of N,N-dimethyl-*p*-toluidine (3.7  $\mu$ L, 0.025 mmol, 1eq.) and pinacolborane (3.6  $\mu$ L, 0.025 mmol, 1eq.). The reaction mixture was then heated at 80 °C for 1 hour before analysis by <sup>1</sup>H NMR spectroscopy.

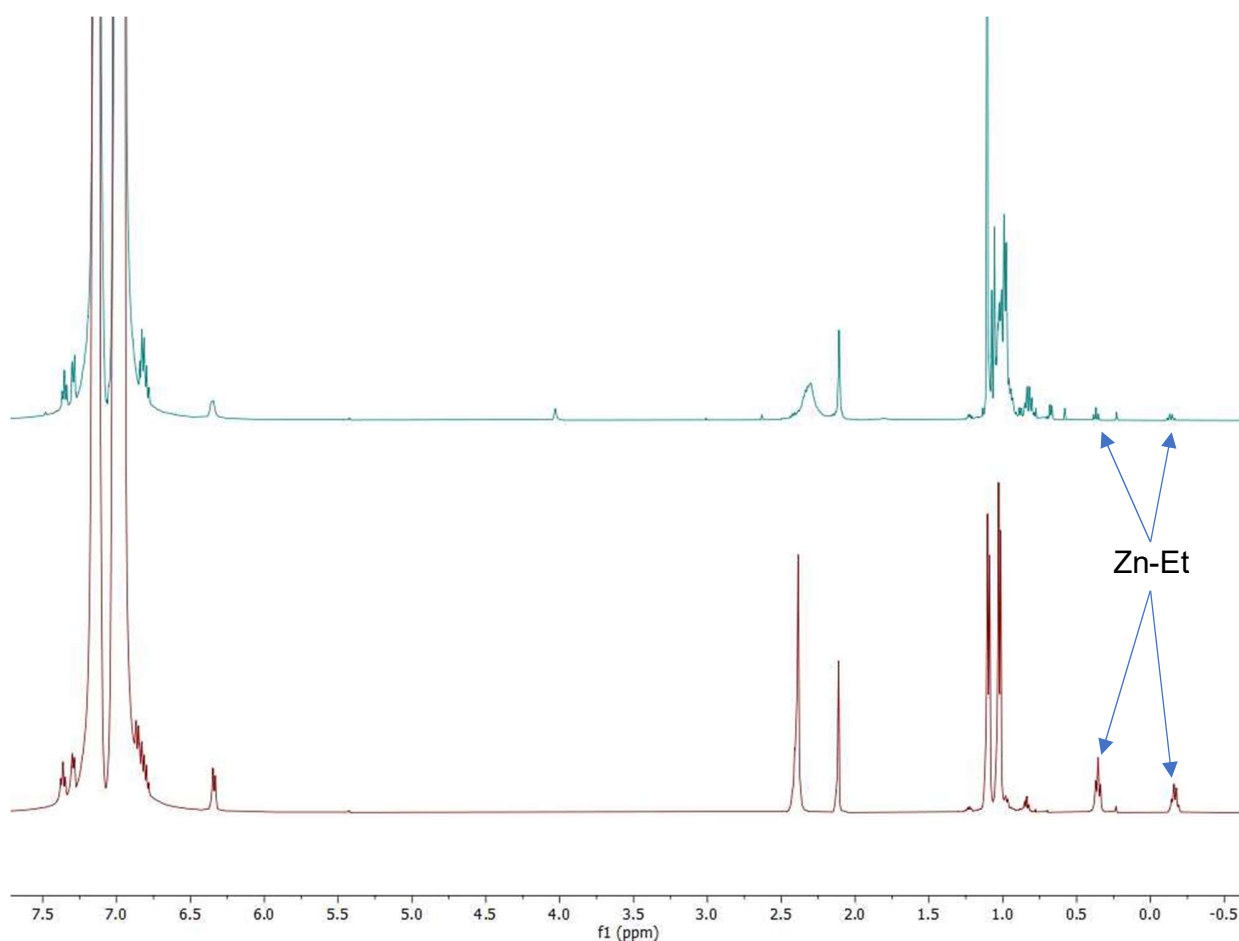

**Figure S49:** Stacked <sup>1</sup>H NMR spectra of putative [IDippZnEt-(DMT)<sub>x</sub>][B(C<sub>6</sub>F<sub>5</sub>)<sub>4</sub>] in PhCl. Before addition of HBPIn (red). After addition of HBPIn and heating at 80 °C for 1 hour (green).

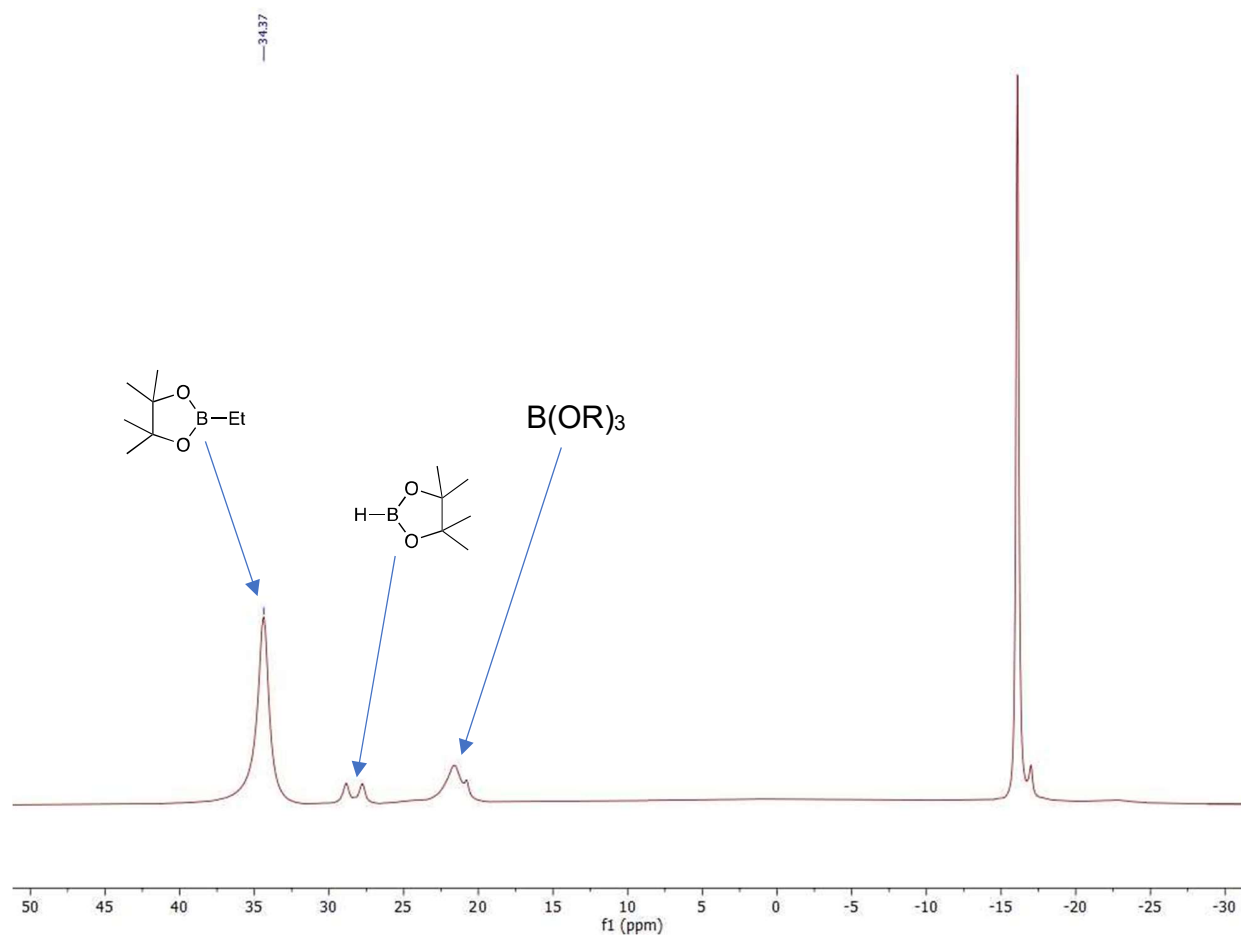

**Figure S50:** Reaction of putative  $[\text{IDippZnEt}-(\text{DMT})_x][\text{B}(\text{C}_6\text{F}_5)_4]$  and HBPIn in PhCl after heating at 80 °C for 1 hour as observed by  $^{11}\text{B}$  NMR spectroscopy.

### S6.3 Attempted indole metalation with putative [IDippZnEt-(DMT)<sub>x</sub>][B(C<sub>6</sub>F<sub>5</sub>)<sub>4</sub>]

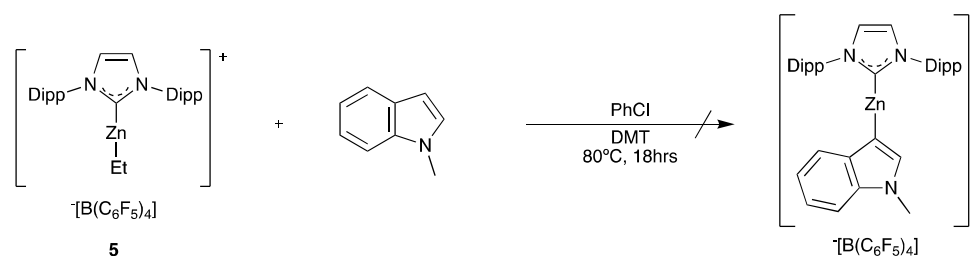

A J Young's NMR tube was charged with **5** (29 mg, 0.025 mmol, 1eq.) this was then dissolved in PhCl (500  $\mu$ L) before addition of N,N-dimethyl-*p*-toluidine (3.7  $\mu$ L, 0.025 mmol, 1eq.) and **2a** (3.1  $\mu$ L, 0.025 mmol, 1eq.). The reaction mixture was then heated at 80 °C for 18 hours before analysis by <sup>1</sup>H NMR spectroscopy.

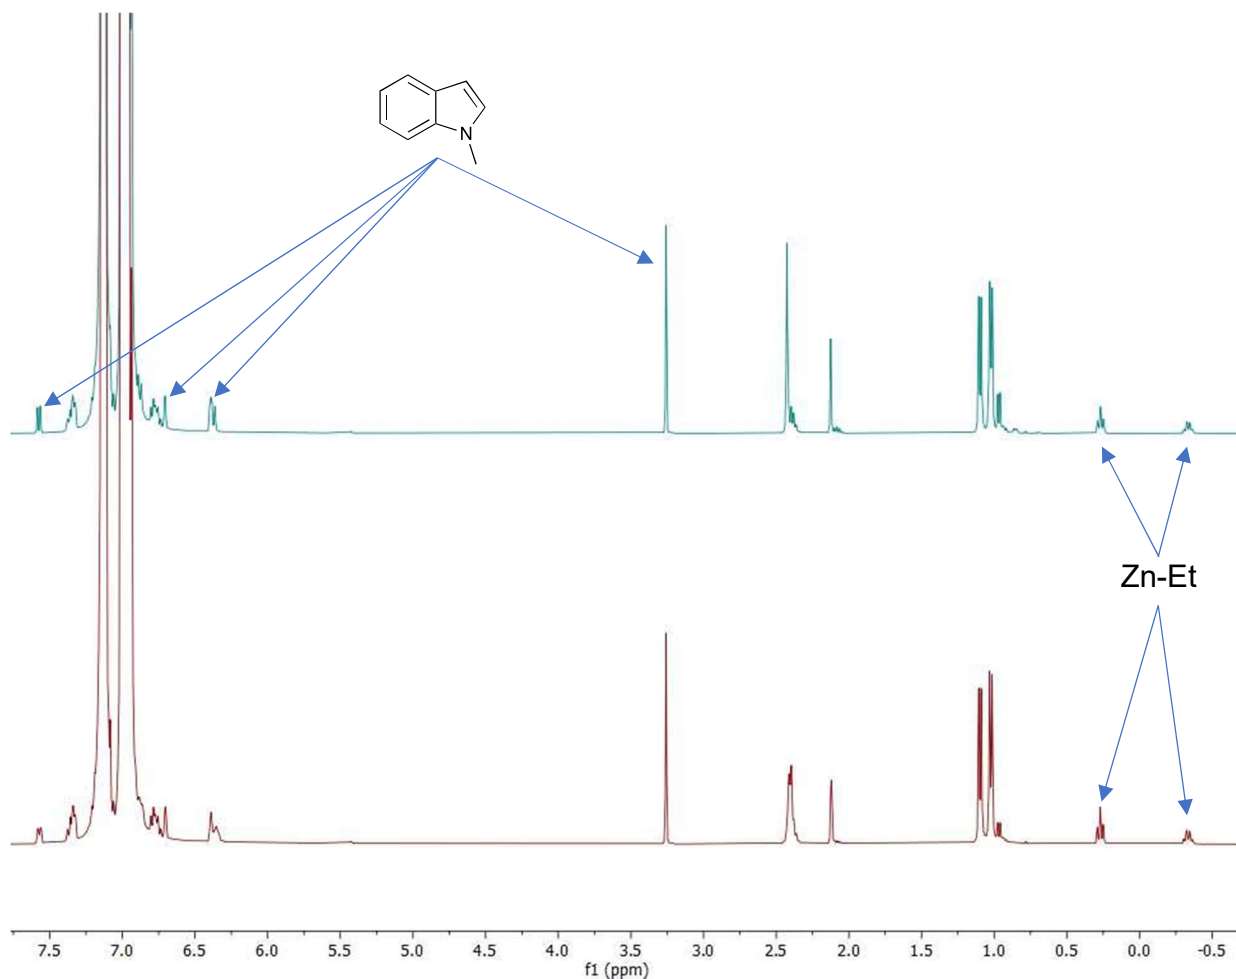

**Figure S51:** Stacked <sup>1</sup>H NMR spectra of **5**, DMT and **2a** in PhCl. Before heating (red). After heating at 80 °C for 18 hours.

## S7. [IDippZnC<sub>6</sub>F<sub>5</sub>][B(C<sub>6</sub>F<sub>5</sub>)<sub>4</sub>] / HBPin interaction study

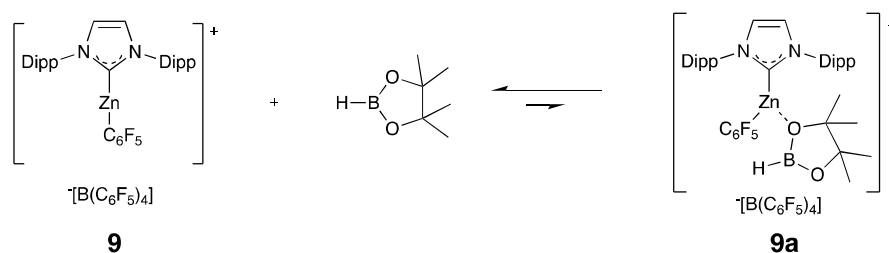

A J Young's NMR tube was charged with **9** (24 mg, 0.018 mmol) before dissolution in PhCl (500  $\mu$ L) and addition of HBPin (13  $\mu$ L, 0.09 mmol), the reaction was then immediately analysed by <sup>1</sup>H, <sup>11</sup>B and <sup>19</sup>F NMR spectroscopy. <sup>11</sup>B NMR spectroscopy revealed a severe broadening of the usually well resolved doublet resonance at 28 ppm corresponding to HBPin. Additionally, shifting of the Zn-C<sub>6</sub>F<sub>5</sub> resonances in the <sup>19</sup>F NMR spectrum (**Figure S52**) was observed upon addition of HBPin.

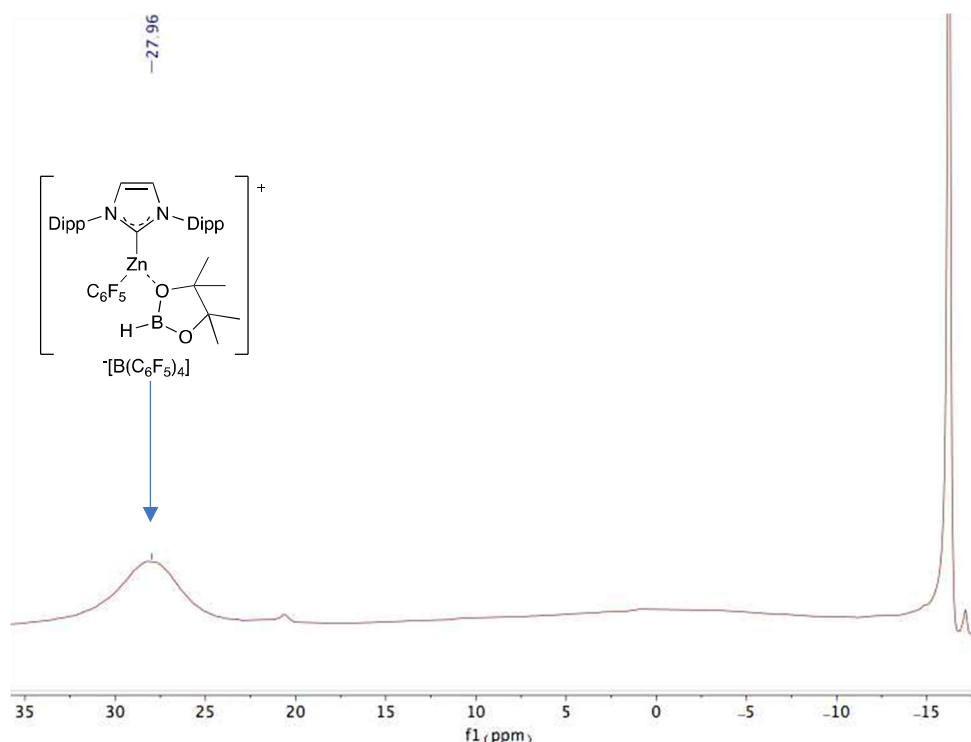

**Figure S52** - <sup>11</sup>B NMR spectrum of **9** and HBPin in PhCl.

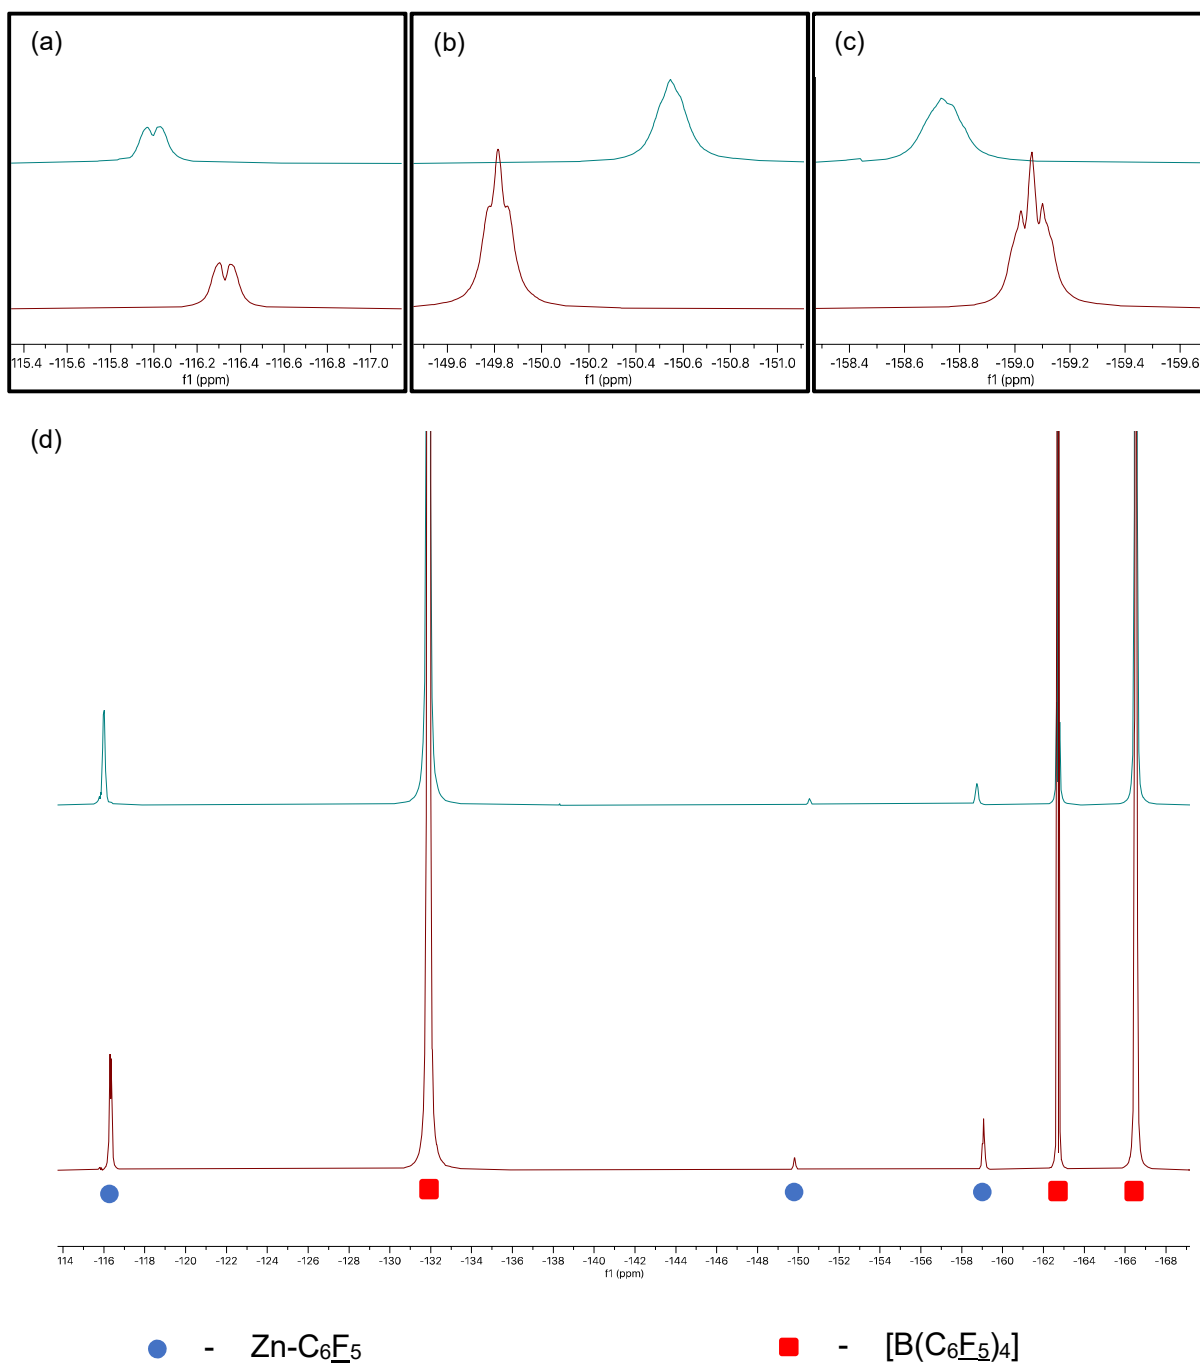

**Figure S53:** (a) Top left. Zoomed image of (d) in the region ca. -116 ppm. (b) Top centre. Zoomed image of (d) in the region ca. -150 ppm. (c) Top right. Zoomed image of (d) in the region ca. -159 ppm. (d) Stacked  $^{19}\text{F}$  spectra of **9** in PhCl (red) and **9** after addition of HBP in PhCl (green). Spectrum referenced to literature values for the anion.

**Analysis of interaction by VT NMR spectroscopy:** A J Young's NMR tube was charged with **9** (24 mg, 18  $\mu$ mmol) before dissolution in PhCl (500  $\mu$ L) and addition of HBPIn (13  $\mu$ L, 0.09 mmol) the interaction was then analysed by  $^{19}\text{F}$  NMR spectroscopy at 27  $^{\circ}\text{C}$ , 0  $^{\circ}\text{C}$ , -10  $^{\circ}\text{C}$ , -20  $^{\circ}\text{C}$ , -30  $^{\circ}\text{C}$  and -40  $^{\circ}\text{C}$ . Two distinct sets of resonances were observed in the  $^{19}\text{F}$  NMR spectra (Figures **S54-57**) at low temperature (-30  $^{\circ}\text{C}$  to -40  $^{\circ}\text{C}$ ) which coalesce at higher temperatures. The sets of resonances in the low-temperature regime were assigned to the Zn-C<sub>6</sub>E<sub>5</sub> resonances of **9** and the O-bound HBPIn adduct **9a**. It should also be noted that a variable temperature  $^{11}\text{B}$  NMR study was also conducted, however whilst decreasing the temperature sharpened the broadened H-BPin peak, neither the expected doublet nor any additional peaks could be resolved at the temperatures accessible with this solvent.

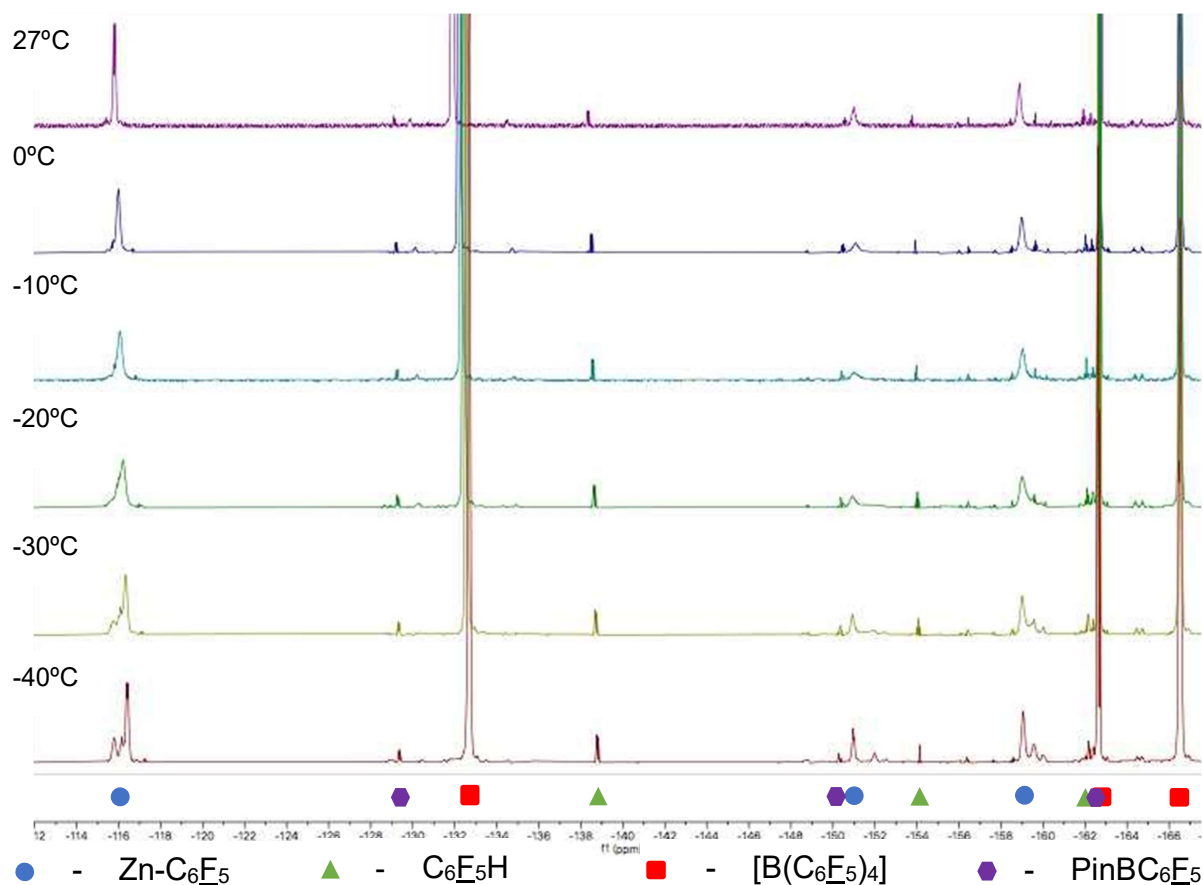

**Figure S54:** Stacked  $^{19}\text{F}$  NMR spectra of reaction mixture of **9** and HBPIn (5eq) in PhCl at various temperatures. Spectrum referenced to literature value for anion.

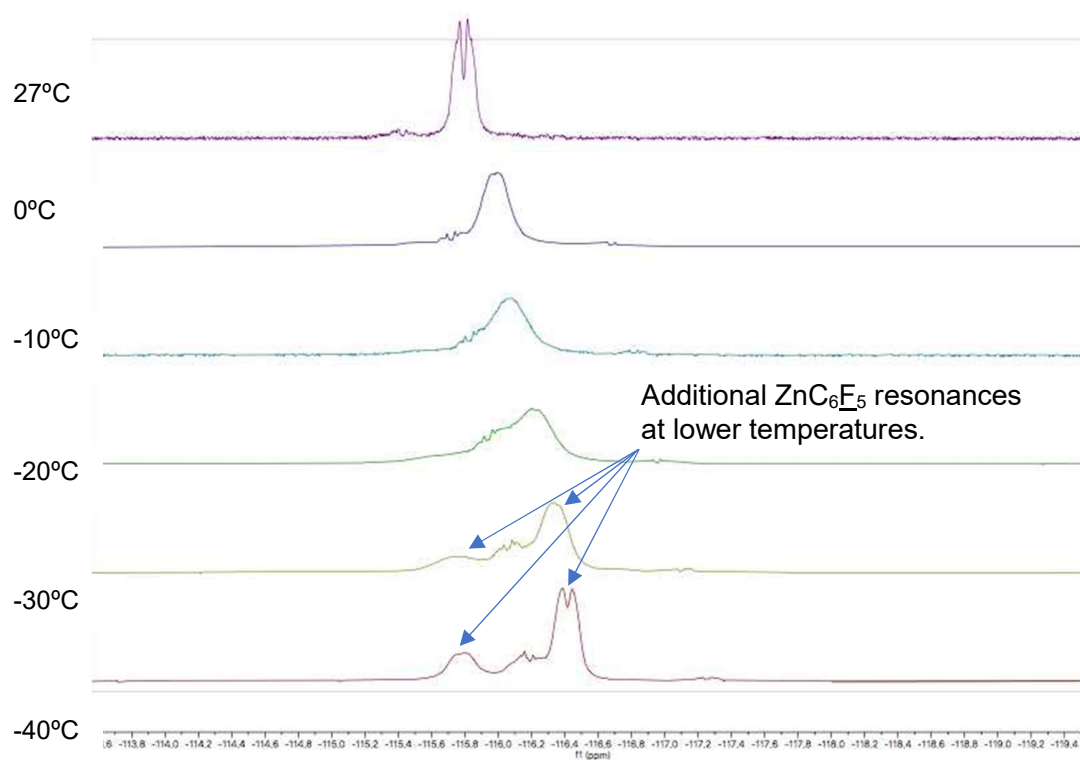

**Figure S55:** Zoomed image of **S54** in to the region ca. -116ppm.

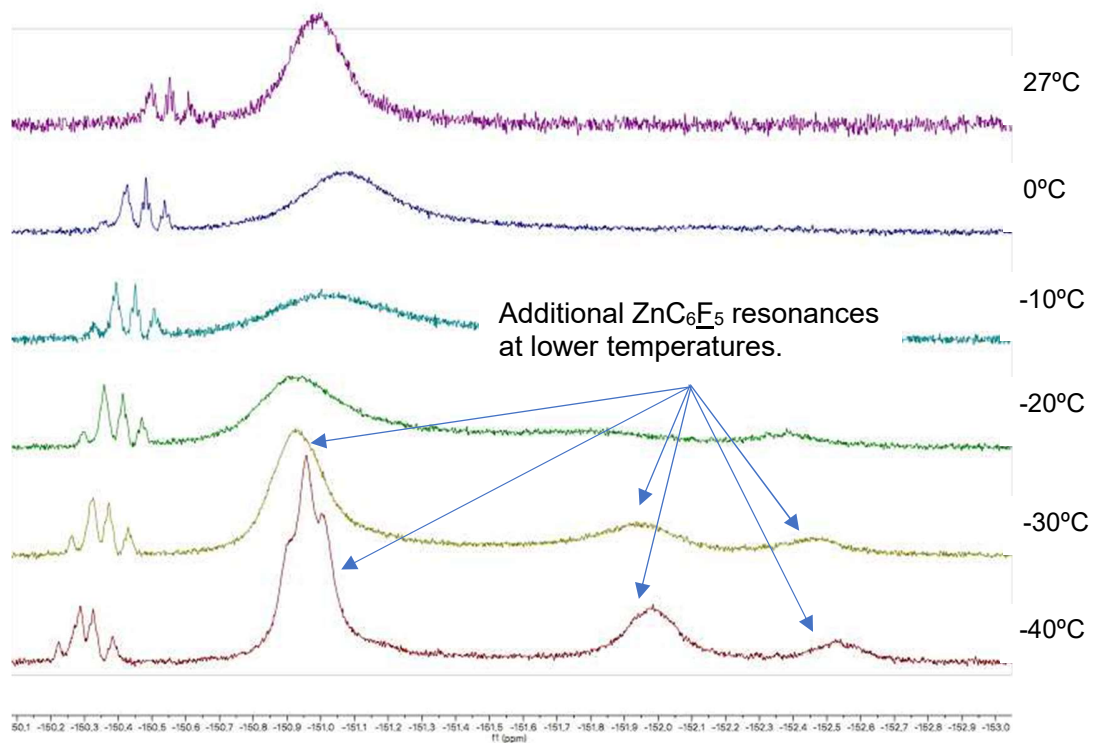

**Figure S56:** Zoomed image of **S54** in to the region ca. -151ppm.

**VT NMR control experiment:** A J Young's NMR tube was charged with **9** (24 mg, 18  $\mu$ mol) before dissolution in PhCl (500  $\mu$ L) the solvated compound was then analysed by  $^{19}\text{F}$  NMR spectroscopy at 27  $^{\circ}\text{C}$ , 0  $^{\circ}\text{C}$ , -10  $^{\circ}\text{C}$ , -20  $^{\circ}\text{C}$ , -30  $^{\circ}\text{C}$  and -40  $^{\circ}\text{C}$ .

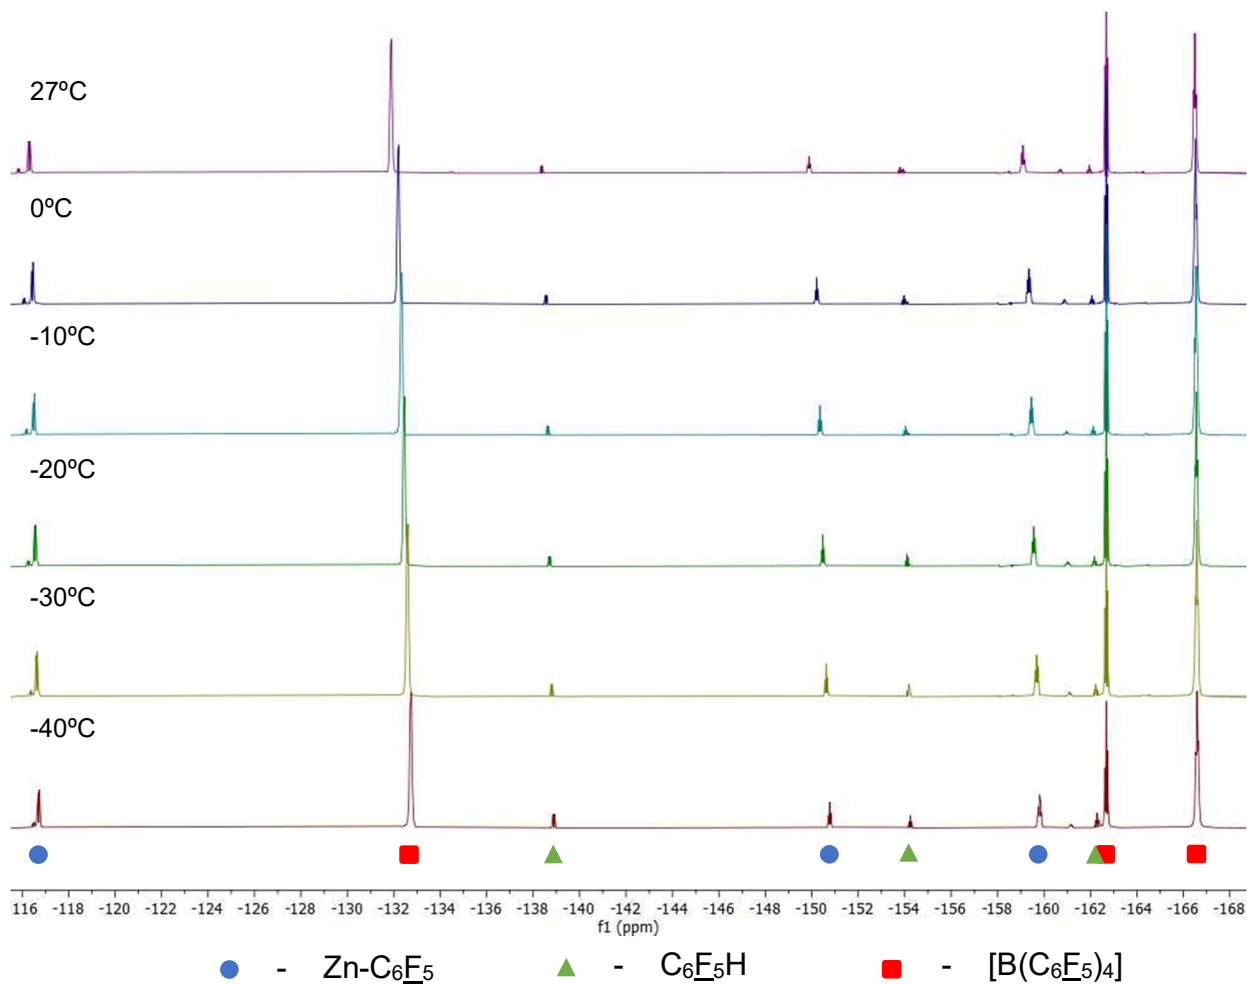

**Figure S57:** Stacked  $^{19}\text{F}$  NMR of **9** solvated in PhCl at various temperatures.



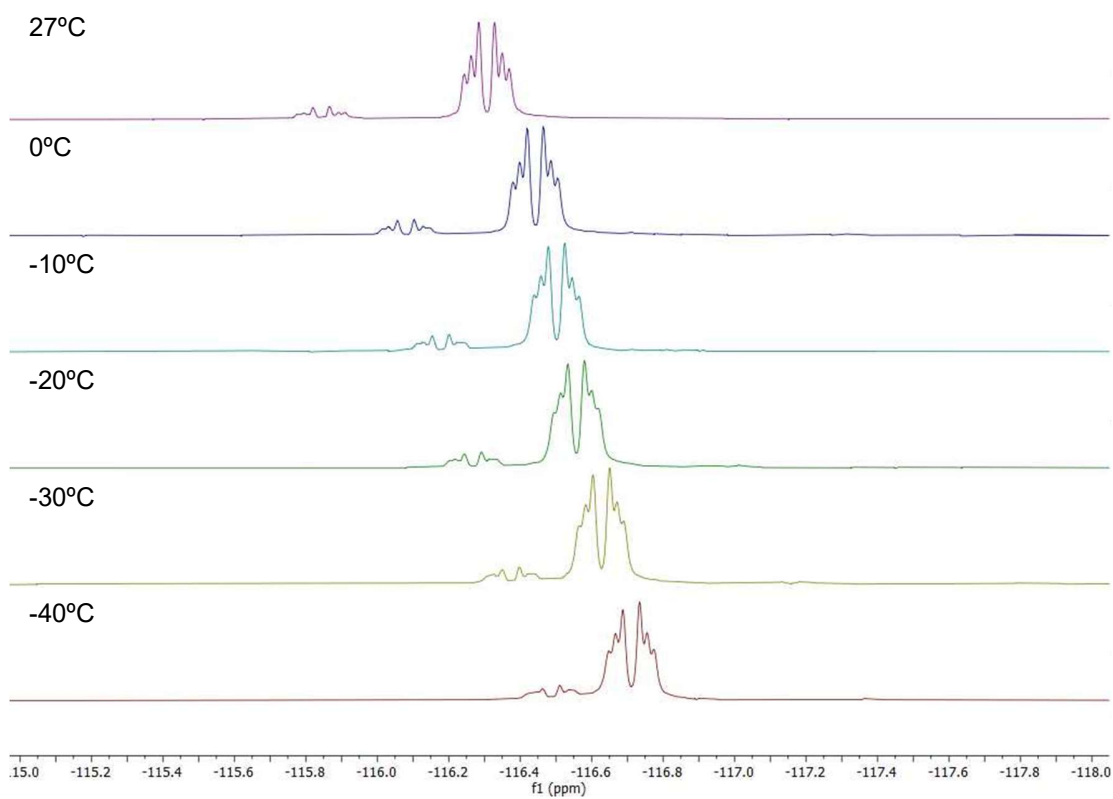

**Figure S58:** Zoomed image of **S57** in to the region ca. -116ppm.

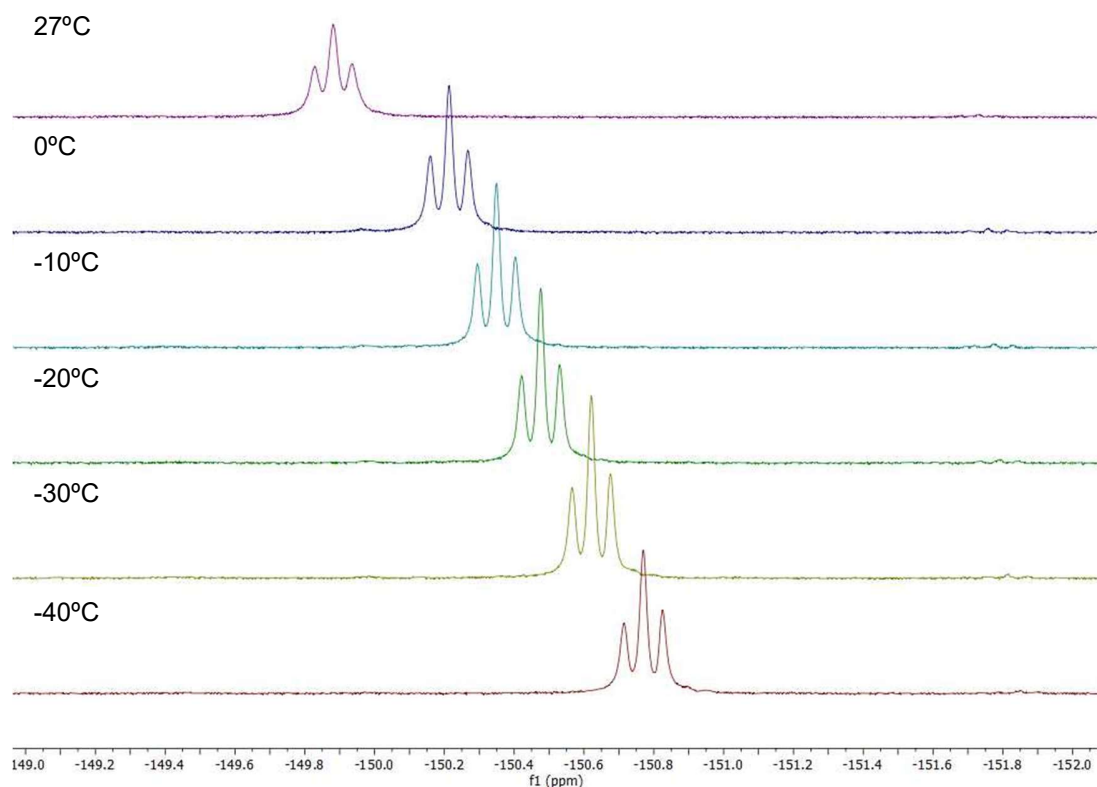

**Figure S59:** Zoomed image of **S57** in to the region ca. -151ppm.

### S8. 7DippZnH(NTf<sub>2</sub>) DBPin H/D exchange study

A J Young's NMR tube was charged with 7DippZnH(NTf<sub>2</sub>) (**1-H**) (19 mg, 0.025 mmol), the solid was then dissolved in PhCl (500 μL) before addition of DBPin (3.6 μL, 0.025 mmol). Immediately after addition <sup>1</sup>H, <sup>11</sup>B and <sup>2</sup>H NMR spectroscopy was used to analyse the reaction mixture.

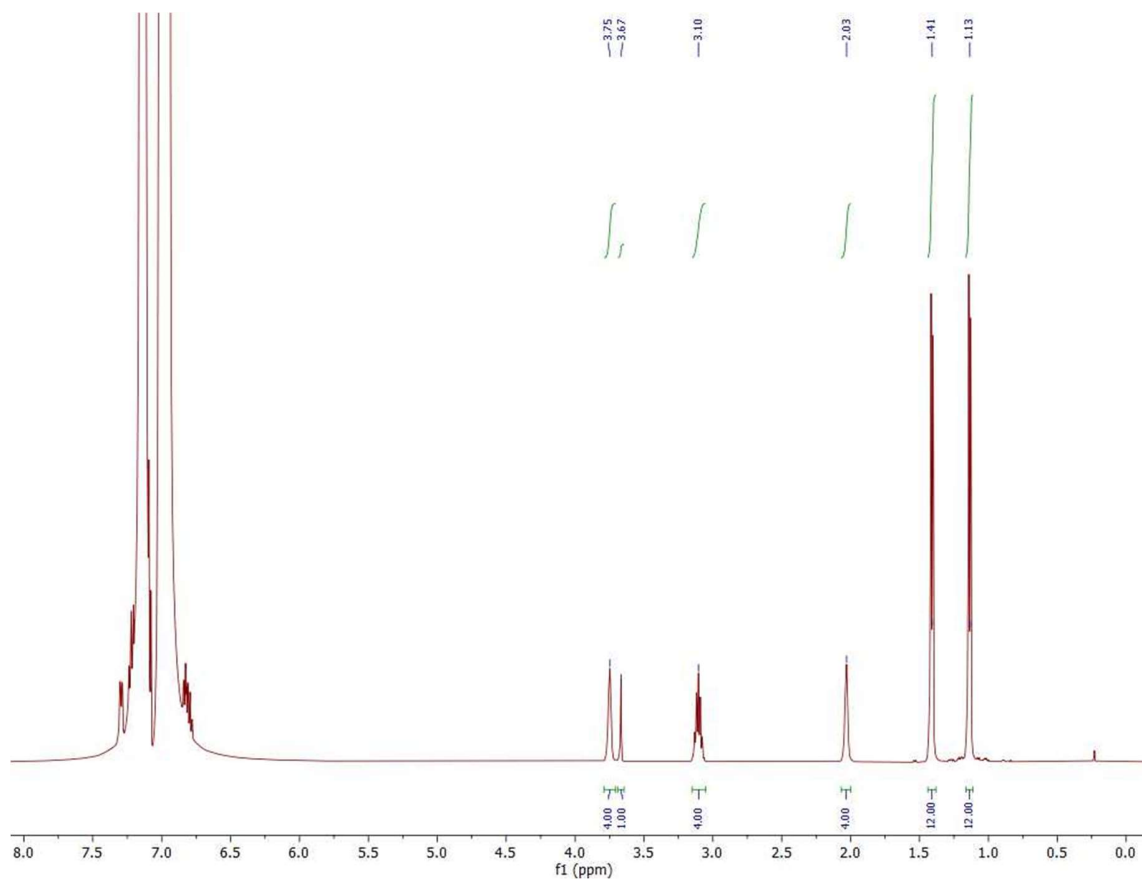

Figure S60 – <sup>1</sup>H NMR spectra of **1-H** in PhCl before addition of DBPin.

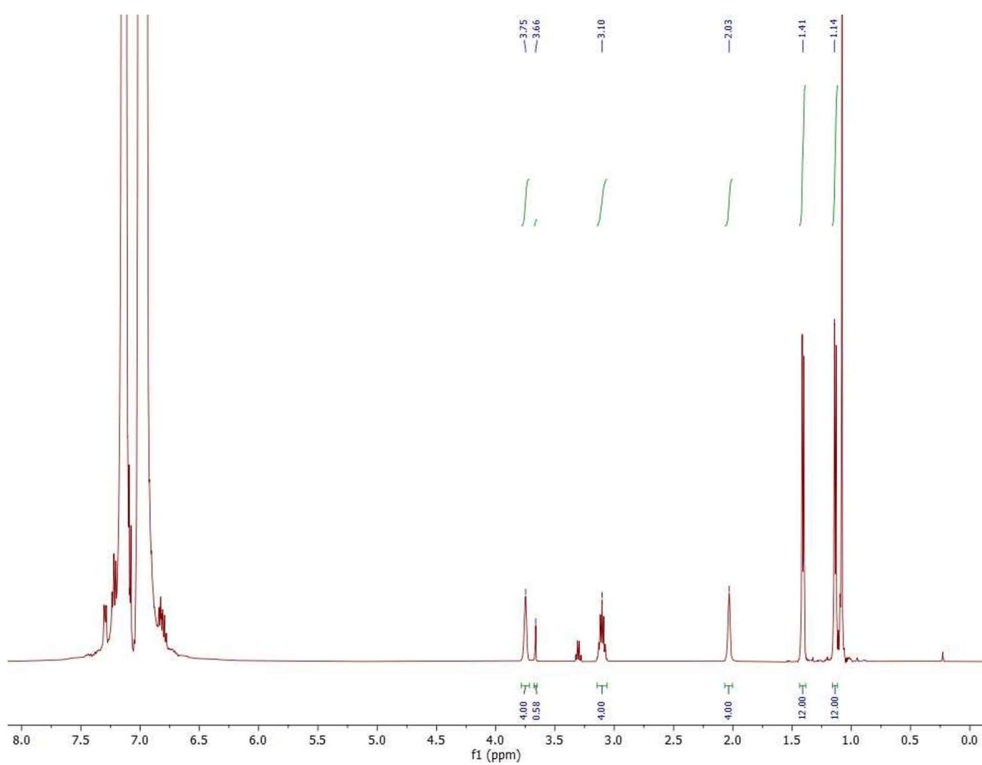

**Figure S61** –  $^1\text{H}$  NMR spectra of **1-H** in PhCl shortly after addition of DBPin.

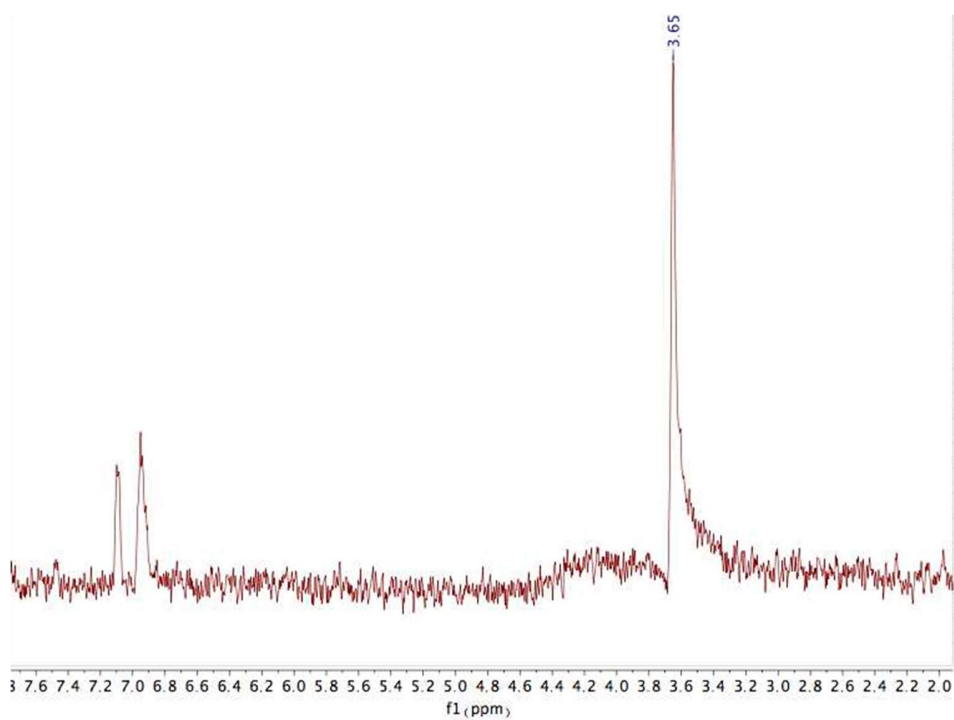

**Figure S62** –  $^2\text{H}$  NMR spectrum of **1-H** shortly after addition of DBPin in PhCl.

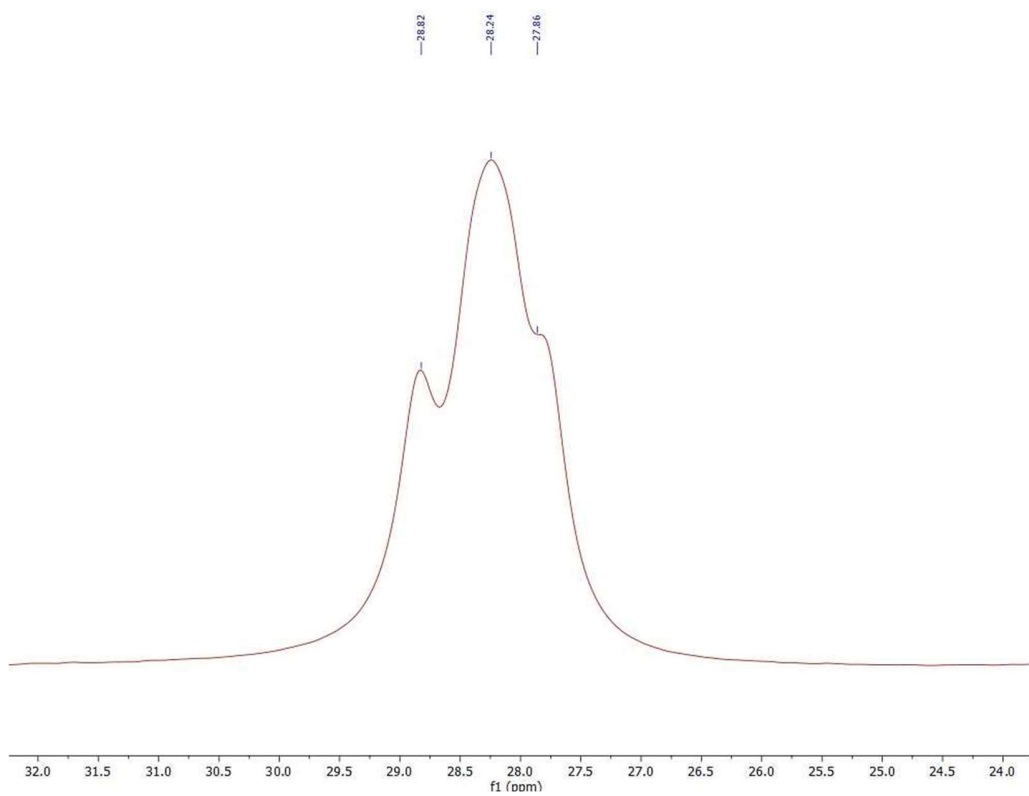

**Figure S63** –  $^{11}\text{B}$  NMR spectrum of **1-H** shortly after addition of DBPin in PhCl.

## S9. Gutmann-Beckett Lewis Acidity tests

The electrophilicity of compounds **1-Ph** and **1-H** as well as the free diarylzinc precursor  $\text{ZnPh}_2$  were measured by the Gutmann-Beckett method.<sup>18-20</sup> The  $^{31}\text{P}\{^1\text{H}\}$  NMR spectrum of a 3:1 ratio of each compound with triethylphosphine oxide ( $\text{Et}_3\text{PO}$ ) in DCM was measured (Table **S5**), data for  $\text{B}(\text{C}_6\text{F}_5)_3$ ,  $[\text{IDippZnMe}][\text{B}(\text{C}_6\text{F}_5)]$  and **9** are as reported by Dagorne and co-workers (the measurements for  $\text{B}(\text{C}_6\text{F}_5)_3$  and **9** were repeated as part of this study).

**Table S5** - Upfield change in  $^{31}\text{P}$  chemical shift of  $\text{Et}_3\text{PO}$  on addition of various electrophilic compounds.

|                                                                                           | $\Delta\delta^{31}\text{P}\{^1\text{H}\} / \text{ppm}$ |
|-------------------------------------------------------------------------------------------|--------------------------------------------------------|
| <b>ZnPh<sub>2</sub></b>                                                                   | 12.2                                                   |
| <b>[IDippZnMe][B(C<sub>6</sub>F<sub>5</sub>)<sub>4</sub>]</b>                             | 17.2 <sup>a</sup>                                      |
| <b>7DippZnPhNTf<sub>2</sub> (1-Ph)</b>                                                    | 19.7                                                   |
| <b>7DippZnHNTf<sub>2</sub> (1-H)</b>                                                      | 22.0                                                   |
| <b>[IDippZnC<sub>6</sub>F<sub>5</sub>][B(C<sub>6</sub>F<sub>5</sub>)<sub>4</sub>] (9)</b> | 24.7                                                   |
| <b>B(C<sub>6</sub>F<sub>5</sub>)<sub>3</sub></b>                                          | 26.4                                                   |

[a]: Data reported by Dagorne and co-workers.<sup>6</sup>

## S10. Et<sub>3</sub>PO-affinity competition experimentation

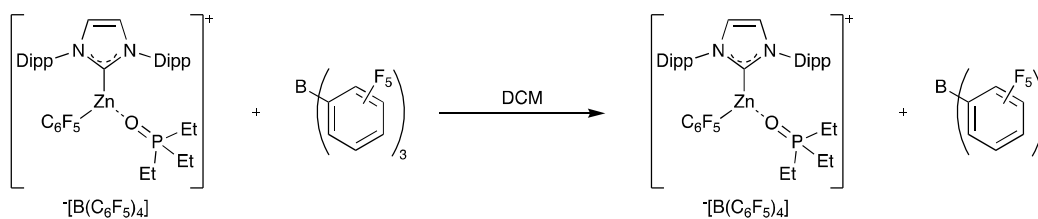

A J Youngs tube was charged with **9** (39 mg, 0.030 mmol, 3 eq.) and dissolved in DCM (500  $\mu$ L) before addition of a 1 M solution of triethylphosphine oxide in DCM (10  $\mu$ L, 0.010 mmol, 1 eq.). After analysis by <sup>31</sup>P NMR spectroscopy  $B(C_6F_5)_3$  (15 mg, 0.030 mmol, 3eq.) was added, <sup>31</sup>P NMR spectroscopy was then used to analyse the reaction mixture immediately after addition of  $B(C_6F_5)_3$  and again after a further 3 days.

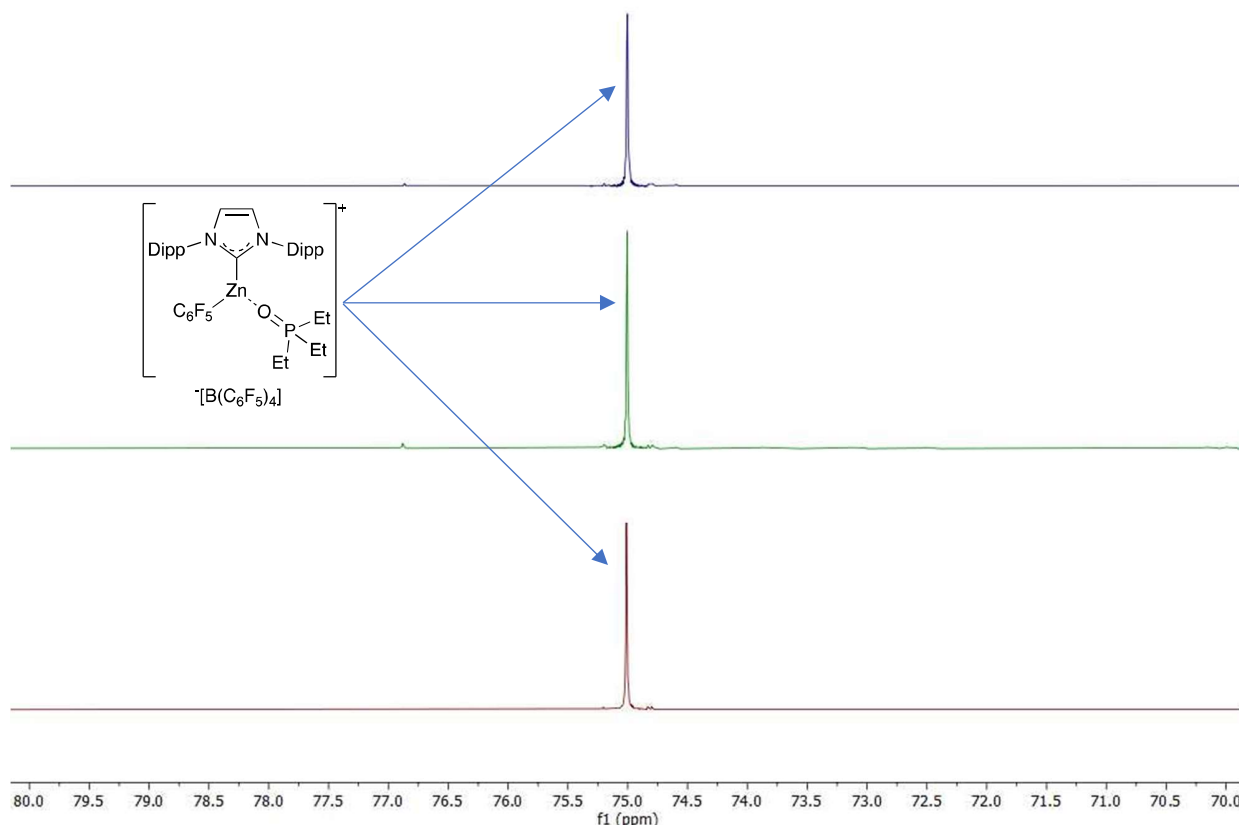

**Figure S64:** Stacked <sup>31</sup>P NMR spectra of triethylphosphine oxide. In the presence of **9** (red). Immediately after addition of  $B(C_6F_5)_3$  (green). 3 days after addition of  $B(C_6F_5)_3$  (blue).

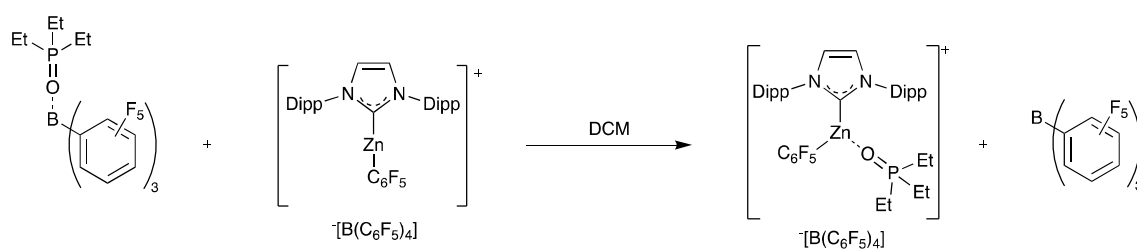

A J Youngs tube was charged with  $B(C_6F_5)_3$  (15 mg, 0.030 mmol, 3eq.) and dissolved in DCM (500  $\mu$ L) before addition of a 1 M solution of triethylphosphine oxide in DCM (10  $\mu$ L, 0.010 mmol, 1 eq.). After analysis by  $^{31}P$  NMR spectroscopy **9** (39 mg, 0.030 mmol, 3 eq.) was added,  $^{31}P$  NMR spectroscopy was then used to analyse the reaction mixture immediately after addition of after  $B(C_6F_5)_3$  and again after a further 3 days.

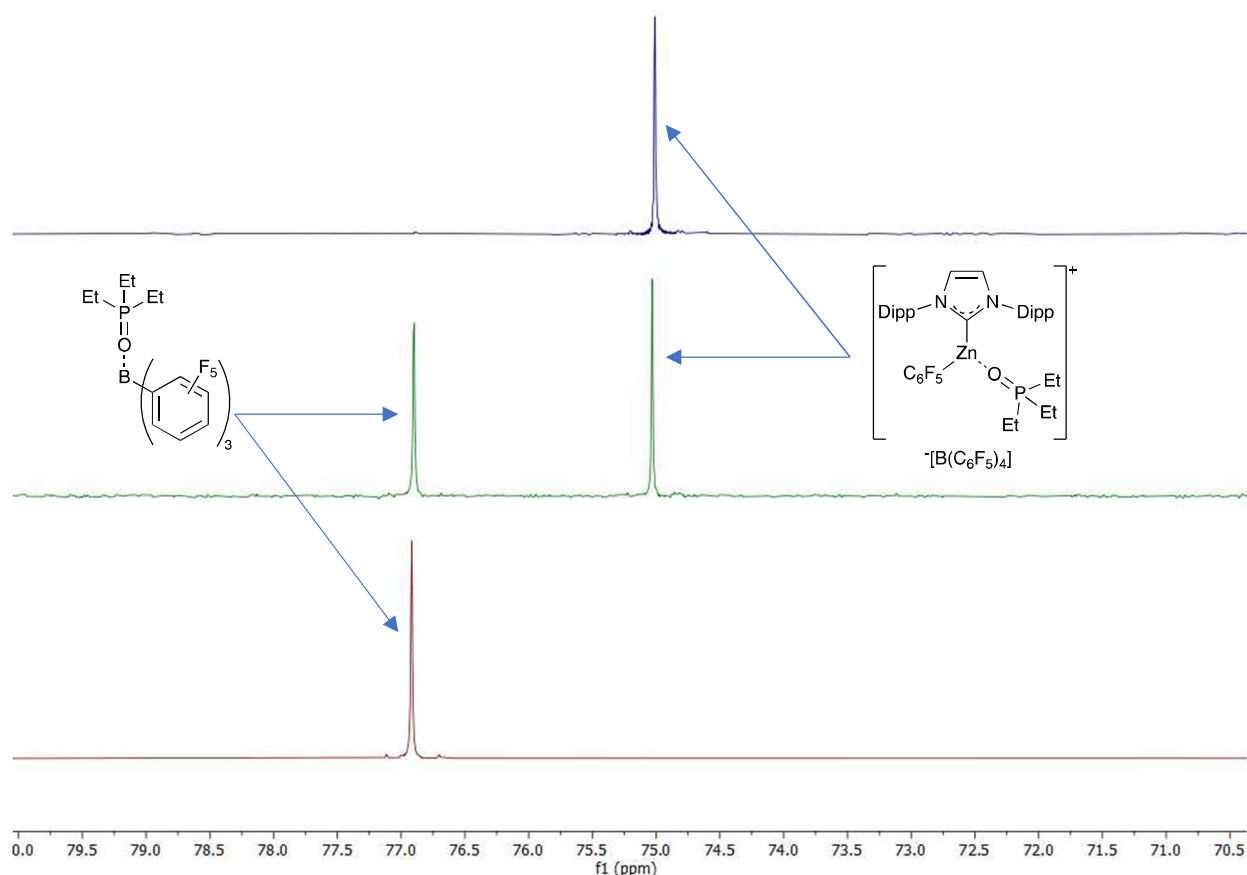

**Figure S65:** Stacked  $^{31}P$  NMR spectra of triethylphosphine oxide. In the presence of  $B(C_6F_5)_3$  (red). Immediately after addition of **9** (green). 3 days after addition of **9** (blue).

## S11. Hydride affinity competition experimentation

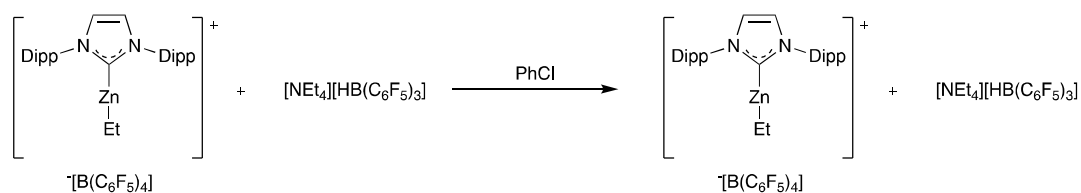

A J Youngs tube was charged with **5** (29 mg, 0.025 mmol, 1 eq.) and  $[\text{NEt}_4][\text{HB}(\text{C}_6\text{F}_5)_3]$  (16 mg, 0.025 mmol, 1eq.), the solids were then dissolved in PhCl (500  $\mu\text{L}$ ). The reaction mixture was left at room temperature for 5 days, then heated to 80  $^\circ\text{C}$  for 18 hrs before analysis by  $^1\text{H}$  and  $^{11}\text{B}$  NMR spectroscopy.

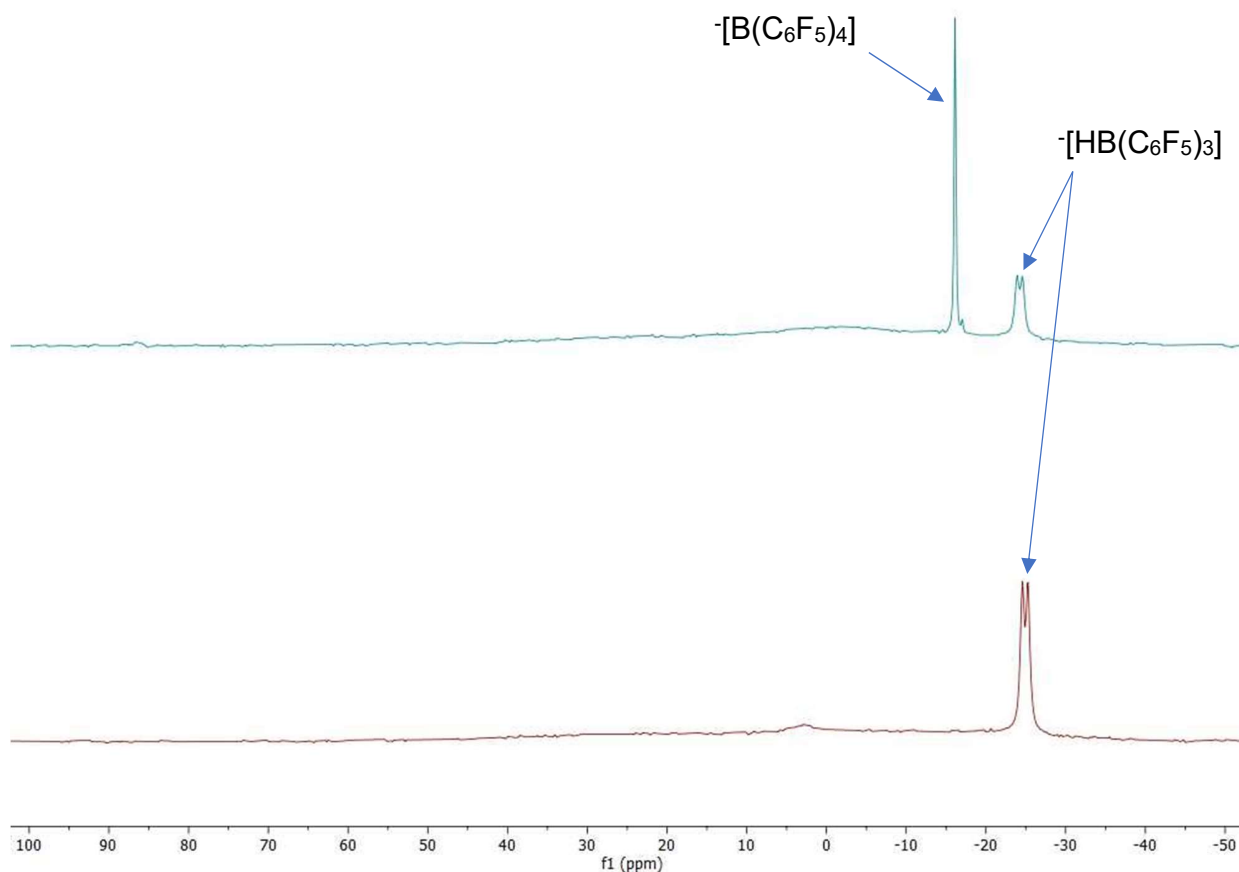

**Figure 66:**  $^{11}\text{B}$  spectrum of  $[\text{HB}(\text{C}_6\text{F}_5)_3][\text{NEt}_4]$  in PhCl (red). Reaction mixture of **5** and  $[\text{HB}(\text{C}_6\text{F}_5)_3][\text{NEt}_4]$  after 18hrs at 80  $^\circ\text{C}$  (green).



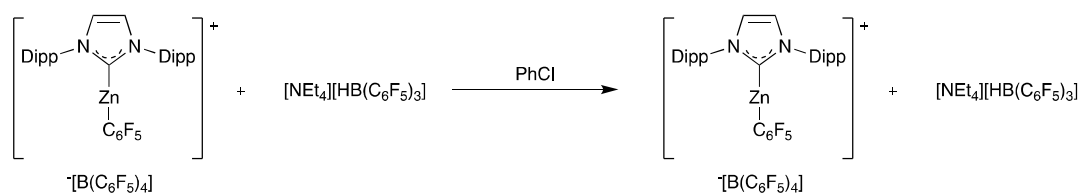

A J Youngs tube was charged with **9** (32 mg, 0.025 mmol, 1 eq.) and  $[\text{NEt}_4][\text{HB}(\text{C}_6\text{F}_5)_3]$  (16 mg, 0.025mmol, 1eq.), the solids were then dissolved in PhCl (500  $\mu\text{L}$ ). The reaction mixture was left at room temperature for 5 days, then heated to 80  $^\circ\text{C}$  for 18 hrs before analysis by  $^1\text{H}$  and  $^{11}\text{B}$  NMR spectroscopy.

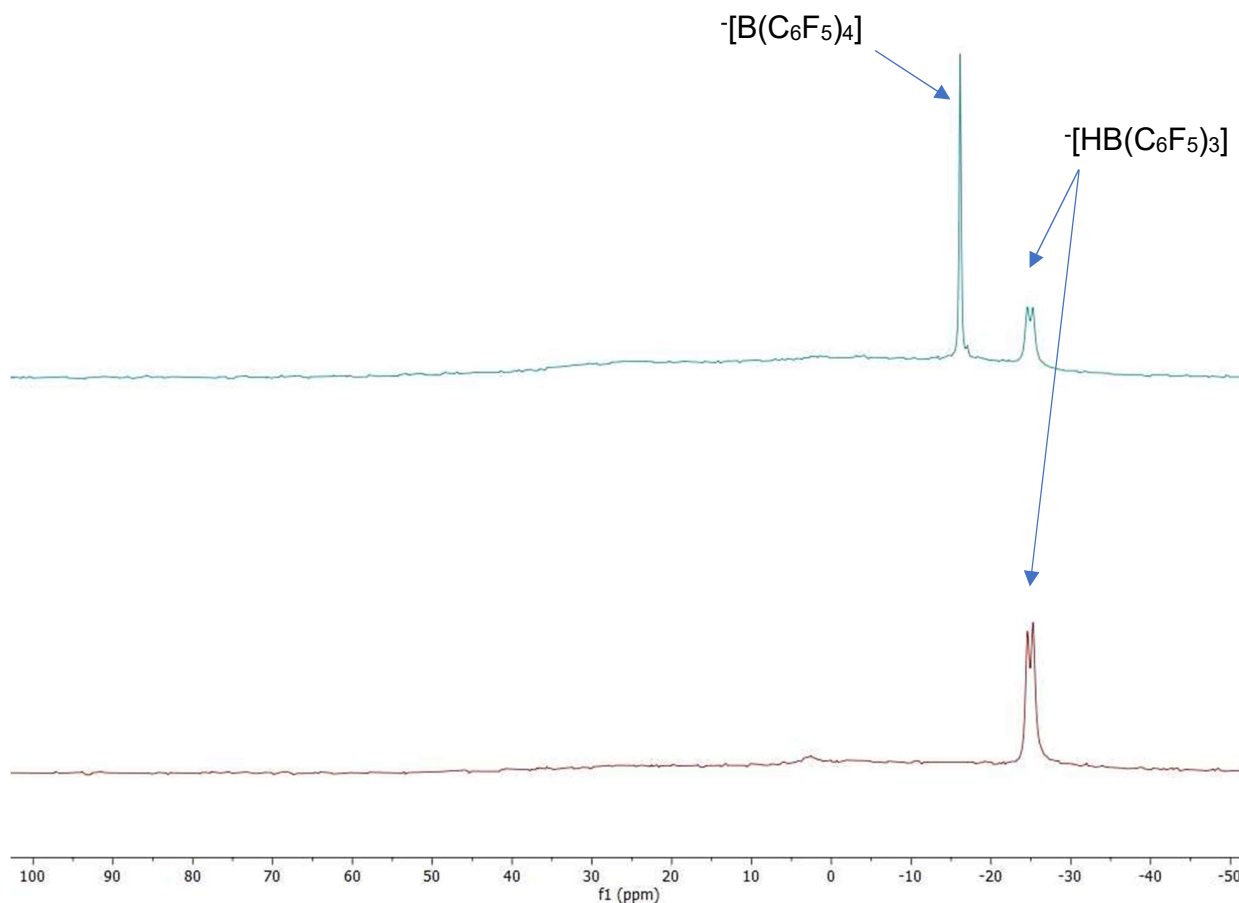

**Figure 67:**  $^{11}\text{B}$  spectrum of  $[\text{HB}(\text{C}_6\text{F}_5)_3][\text{NEt}_4]$  in PhCl (red). Reaction mixture of **9** and  $[\text{HB}(\text{C}_6\text{F}_5)_3][\text{NEt}_4]$  after 18hrs at 80  $^\circ\text{C}$  (green).

## S12. Isolation of borenium species [IDippBPin][NTf<sub>2</sub>]

The use of IDippZnPhNTf<sub>2</sub> (in the presence of catalytic 2-dimethylaminopyridine) as a catalyst in the C-H borylation of **2a** was unsuccessful in achieving substrate conversion, however the complex [IDippBPin][NTf<sub>2</sub>] (**8**) was isolated from this reaction mixture. A J Youngs tube was charged with IDippZnPh(NTf<sub>2</sub>) (41 mg, 0.05 mmol) and dissolved in PhCl (500 μL), Pinacolborane (145 μL, 1.00 mmol, 2eq.) and 2-dimethylaminopyridine (6.2 μL, 0.05 mmol) were then added followed by N-Me-Indole (**2a**) (63 μL, 0.50 mmol, 1eq.) and the reaction mixture heated to 80 °C for 18 hrs. Analysis by <sup>1</sup>H and <sup>11</sup>B NMR spectroscopy showed no borylation of **2a**. Storage of the reaction mixture at room temperature lead to the formation of crystalline material, analysis by single crystal X-ray crystallography showed the formation of NHC-borenium complex **8** (**Figure S68**).

## S13. X-Ray Crystallography

### S13.1 Crystal structure of [IDippBPin][NTf<sub>2</sub>]

A suitable crystal with dimensions  $0.39 \times 0.12 \times 0.03 \text{ mm}^3$  was selected and mounted on a Bruker D8 VENTURE diffractometer. The crystal was kept at a steady  $T = 100.0 \text{ K}$  during data collection. The structure was solved and the space group  $P2_1/c$  (# 14) determined by the ShelXT structure solution program using dual methods and refined by full matrix least squares minimisation on  $F^2$  using version 2018/3 of ShelXL 2018/3.<sup>21-23</sup> All non-hydrogen atoms were refined anisotropically. Hydrogen atom positions were calculated geometrically and refined using the riding model. The data set was truncated at  $1 \text{ \AA}$  resolution during integration due to rapidly rising values of  $R(\text{merge})$  at higher angle. Selected crystallographic data are presented in Table S6 and full details of [IDippBPin][NTf<sub>2</sub>] in cif format can be obtained free of charge from the Cambridge Crystallographic Data Centre via [www.ccdc.cam.ac.uk/data\\_request/cif](http://www.ccdc.cam.ac.uk/data_request/cif).

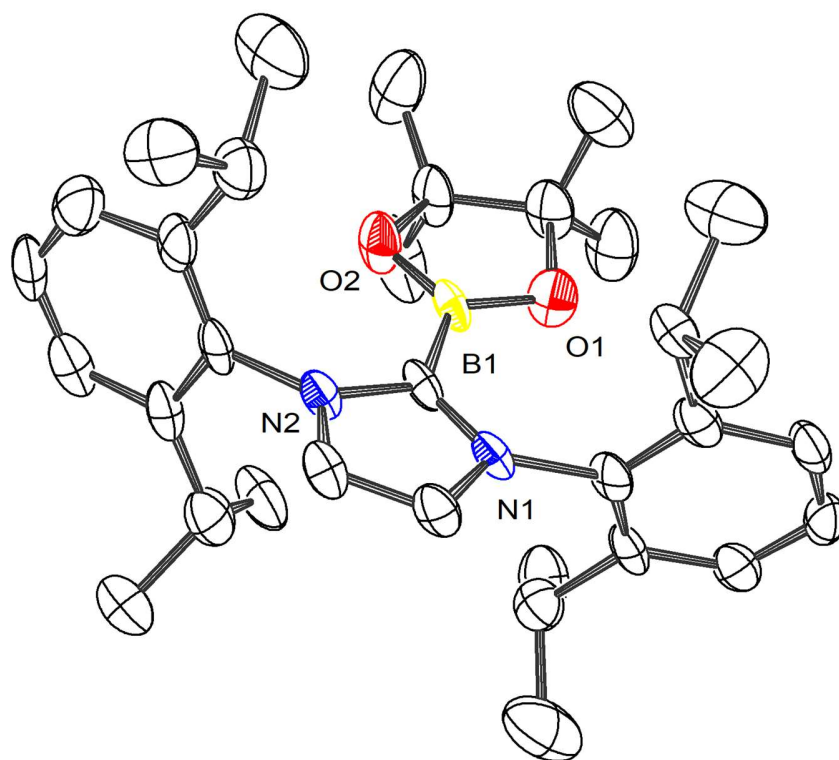

**Figure S68:** ORTEP plot for [IDippBPin][NTf<sub>2</sub>], counter anion and hydrogens are omitted for clarity (50% probability).

Table S6 – Crystal data and structure refinement for [IDippBPin][NTf<sub>2</sub>].

|                                               |                                                                                              |
|-----------------------------------------------|----------------------------------------------------------------------------------------------|
| Identification code                           | 2074219                                                                                      |
| Formula                                       | C <sub>35</sub> H <sub>48</sub> BF <sub>6</sub> N <sub>3</sub> O <sub>6</sub> S <sub>2</sub> |
| <i>D</i> <sub>calc.</sub> /g cm <sup>-3</sup> | 1.299                                                                                        |
| μ/mm <sup>-1</sup>                            | 0.203                                                                                        |
| Formula Weight                                | 795.69                                                                                       |
| Colour                                        | clear colourless                                                                             |
| Shape                                         | plate                                                                                        |
| Size/mm <sup>3</sup>                          | 0.39×0.12×0.03                                                                               |
| <i>T</i> /K                                   | 100.0                                                                                        |
| Crystal System                                | monoclinic                                                                                   |
| Space Group                                   | <i>P</i> 2 <sub>1</sub> / <i>c</i>                                                           |
| <i>a</i> /Å                                   | 19.260(5)                                                                                    |
| <i>b</i> /Å                                   | 12.118(3)                                                                                    |
| <i>c</i> /Å                                   | 19.857(7)                                                                                    |
| α/°                                           | 90                                                                                           |
| β/°                                           | 118.607(5)                                                                                   |
| γ/°                                           | 90                                                                                           |
| <i>V</i> /Å <sup>3</sup>                      | 4069(2)                                                                                      |
| <i>Z</i>                                      | 4                                                                                            |
| <i>Z</i> '                                    | 1                                                                                            |
| Wavelength/Å                                  | 0.71073                                                                                      |
| Radiation type                                | MoK <sub>α</sub>                                                                             |
| Θ <sub>min</sub> /°                           | 2.337                                                                                        |
| Θ <sub>max</sub> /°                           | 19.796                                                                                       |
| Measured Refl's.                              | 37868                                                                                        |
| Indep't Refl's                                | 3681                                                                                         |
| Refl's I≥2 σ(I)                               | 2694                                                                                         |
| <i>R</i> <sub>int</sub>                       | 0.1146                                                                                       |
| Parameters                                    | 491                                                                                          |
| Restraints                                    | 0                                                                                            |
| Largest Peak                                  | 0.407                                                                                        |
| Deepest Hole                                  | -0.257                                                                                       |
| Goof                                          | 1.097                                                                                        |
| <i>wR</i> <sub>2</sub> (all data)             | 0.1605                                                                                       |
| <i>wR</i> <sub>2</sub>                        | 0.1383                                                                                       |
| <i>R</i> <sub>1</sub> (all data)              | 0.0851                                                                                       |

### S13.2 Crystal structure of **11**

A suitable crystal with dimensions  $0.30 \times 0.14 \times 0.11 \text{ mm}^3$  was selected and mounted on a Xcalibur, Eos diffractometer. The crystal was kept at a steady  $T = 120.0 \text{ K}$  during data collection. The structure was solved and the space group  $Pc$  determined by the ShelXT structure solution program using dual methods and refined by full matrix least squares minimisation on  $F^2$  using version 2018/3 of ShelXL 2018/3.<sup>21-23</sup> All non-hydrogen atoms were refined anisotropically. Hydrogen atom positions were calculated geometrically and refined using the riding model. Selected crystallographic data are presented in Table **S7** and full details of **11** in cif format can be obtained free of charge from the Cambridge Crystallographic Data Centre via [www.ccdc.cam.ac.uk/data\\_request/cif](http://www.ccdc.cam.ac.uk/data_request/cif).

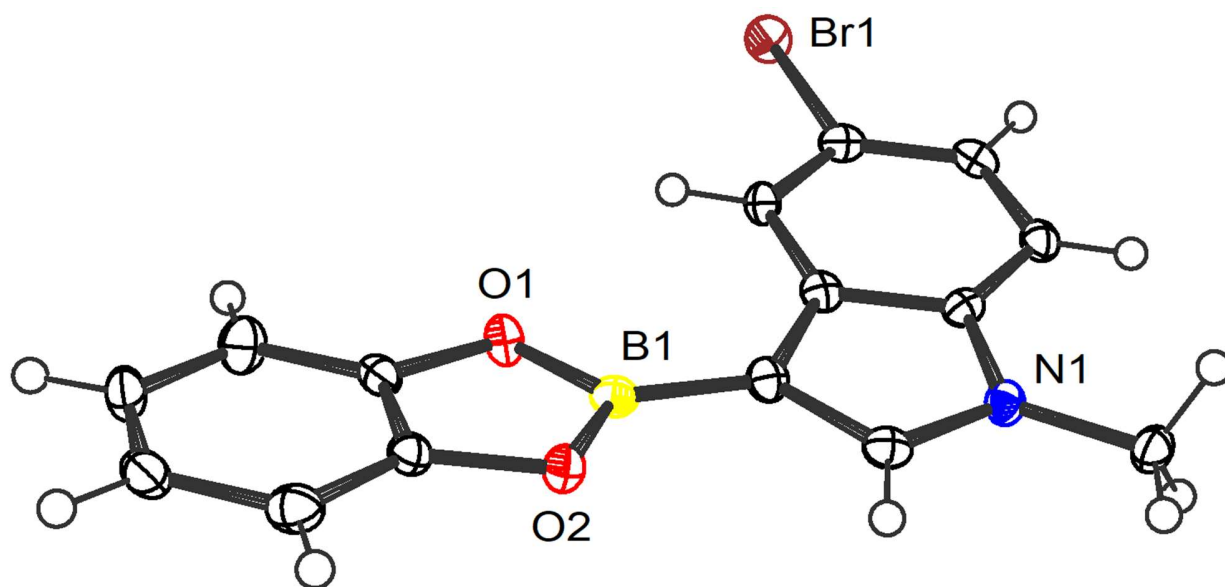

Figure S69: ORTEP plot of **11** (50% probability).

**Table S7:** Crystal data and structure refinement for **11**.

|                                                   |                                                               |
|---------------------------------------------------|---------------------------------------------------------------|
| <b>Identification code</b>                        | 2074218                                                       |
| <b>Empirical formula</b>                          | C <sub>15</sub> H <sub>11</sub> BBrNO <sub>2</sub>            |
| <b>Formula weight</b>                             | 327.97                                                        |
| <b>Temperature/K</b>                              | 119.99(11)                                                    |
| <b>Crystal system</b>                             | monoclinic                                                    |
| <b>Space group</b>                                | Pc                                                            |
| <b>a/Å</b>                                        | 11.8776(6)                                                    |
| <b>b/Å</b>                                        | 4.6452(2)                                                     |
| <b>c/Å</b>                                        | 12.9310(6)                                                    |
| <b>α/°</b>                                        | 90                                                            |
| <b>β/°</b>                                        | 113.246(6)                                                    |
| <b>γ/°</b>                                        | 90                                                            |
| <b>Volume/Å<sup>3</sup></b>                       | 655.53(6)                                                     |
| <b>Z</b>                                          | 2                                                             |
| <b>ρ<sub>calc</sub>/g/cm<sup>3</sup></b>          | 1.662                                                         |
| <b>μ/mm<sup>-1</sup></b>                          | 3.134                                                         |
| <b>F(000)</b>                                     | 328.0                                                         |
| <b>Crystal size/mm<sup>3</sup></b>                | 0.298 × 0.14 × 0.105                                          |
| <b>Radiation</b>                                  | Mo Kα (λ = 0.71073)                                           |
| <b>2θ range for data collection/°</b>             | 6.858 to 58.984                                               |
| <b>Index ranges</b>                               | -14 ≤ h ≤ 15, -6 ≤ k ≤ 5, -16 ≤ l ≤ 17                        |
| <b>Reflections collected</b>                      | 7683                                                          |
| <b>Independent reflections</b>                    | 2641 [R <sub>int</sub> = 0.0362, R <sub>sigma</sub> = 0.0449] |
| <b>Data/restraints/parameters</b>                 | 2641/2/182                                                    |
| <b>Goodness-of-fit on F<sup>2</sup></b>           | 1.041                                                         |
| <b>Final R indexes [I ≥ 2σ (I)]</b>               | R <sub>1</sub> = 0.0312, wR <sub>2</sub> = 0.0668             |
| <b>Final R indexes [all data]</b>                 | R <sub>1</sub> = 0.0356, wR <sub>2</sub> = 0.0691             |
| <b>Largest diff. peak/hole / e Å<sup>-3</sup></b> | 0.43/-0.55                                                    |
| <b>Flack parameter</b>                            | -0.017(8)                                                     |

### S13.3 Crystal structure of 7DippZnEt<sub>2</sub>

A suitable crystal with dimensions  $0.45 \times 0.25 \times 0.14 \text{ mm}^3$  was selected and mounted on a Bruker D8 VENTURE diffractometer. The crystal was kept at a steady  $T = 120.0 \text{ K}$  during data collection. The structure was solved and the space group  $P2_1$  determined by the ShelXT structure solution program using dual methods and refined by full matrix least squares minimisation on  $F^2$  using version 2018/3 of ShelXL 2018/3.<sup>21-23</sup> All non-hydrogen atoms were refined anisotropically. Hydrogen atom positions were calculated geometrically and refined using the riding model. Selected crystallographic data are presented in Table S8 and full details of 7DippZnEt<sub>2</sub> in cif format can be obtained free of charge from the Cambridge Crystallographic Data Centre via [www.ccdc.cam.ac.uk/data\\_request/cif](http://www.ccdc.cam.ac.uk/data_request/cif).

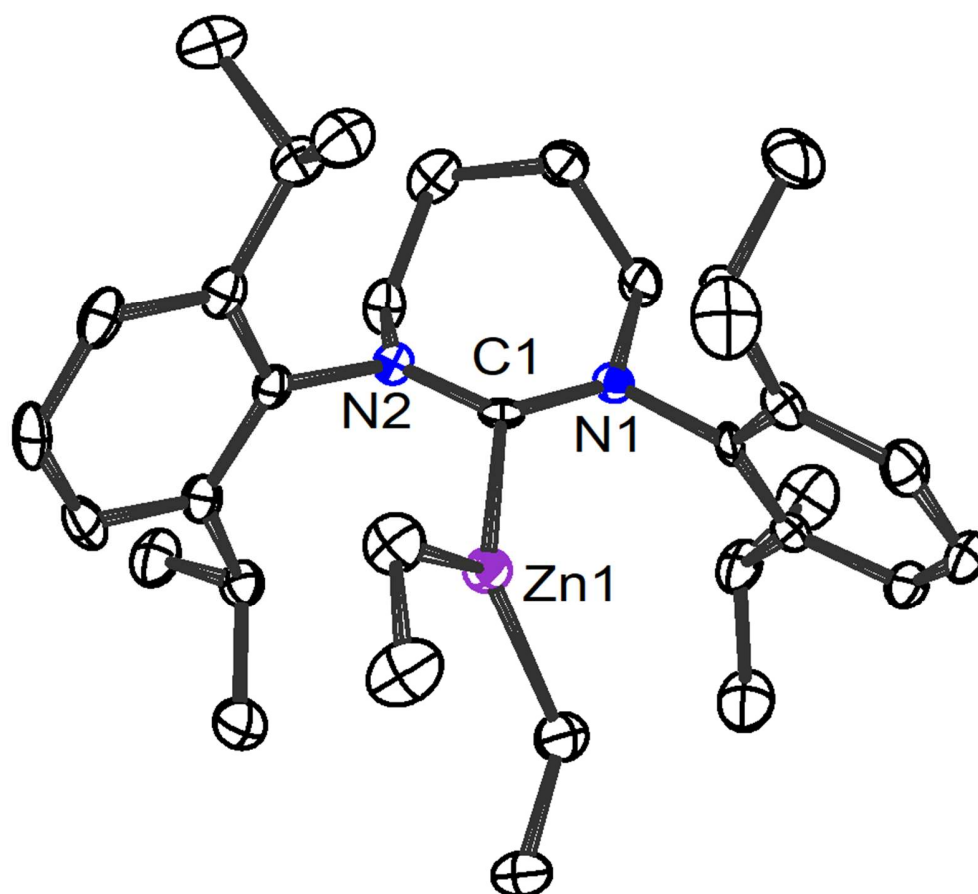

Figure S70: ORTEP plot of 7DippZnEt<sub>2</sub> (50% probability).

**Table S8** - Crystal data and structure refinement for **7DippZnEt<sub>2</sub>**.

|                                                   |                                                                |
|---------------------------------------------------|----------------------------------------------------------------|
| <b>Identification code</b>                        | 2074217                                                        |
| <b>Empirical formula</b>                          | C <sub>33</sub> H <sub>52</sub> N <sub>2</sub> Zn              |
| <b>Formula weight</b>                             | 542.13                                                         |
| <b>Temperature/K</b>                              | 120.0(5)                                                       |
| <b>Crystal system</b>                             | monoclinic                                                     |
| <b>Space group</b>                                | P2 <sub>1</sub>                                                |
| <b>a/Å</b>                                        | 15.9444(3)                                                     |
| <b>b/Å</b>                                        | 19.6420(3)                                                     |
| <b>c/Å</b>                                        | 19.6889(3)                                                     |
| <b>α/°</b>                                        | 90                                                             |
| <b>β/°</b>                                        | 90.0090(10)                                                    |
| <b>γ/°</b>                                        | 90                                                             |
| <b>Volume/Å<sup>3</sup></b>                       | 6166.17(18)                                                    |
| <b>Z</b>                                          | 8                                                              |
| <b>ρ<sub>calc</sub>/g/cm<sup>3</sup></b>          | 1.168                                                          |
| <b>μ/mm<sup>-1</sup></b>                          | 0.819                                                          |
| <b>F(000)</b>                                     | 2352.0                                                         |
| <b>Crystal size/mm<sup>3</sup></b>                | 0.451 × 0.247 × 0.143                                          |
| <b>Radiation</b>                                  | MoKα (λ = 0.71073)                                             |
| <b>2θ range for data collection/°</b>             | 6.582 to 59.04                                                 |
| <b>Index ranges</b>                               | -21 ≤ h ≤ 21, -26 ≤ k ≤ 26, -25 ≤ l ≤ 25                       |
| <b>Reflections collected</b>                      | 135687                                                         |
| <b>Independent reflections</b>                    | 30273 [R <sub>int</sub> = 0.0479, R <sub>sigma</sub> = 0.0566] |
| <b>Data/restraints/parameters</b>                 | 30273/34/1359                                                  |
| <b>Goodness-of-fit on F<sup>2</sup></b>           | 1.026                                                          |
| <b>Final R indexes [I ≥ 2σ (I)]</b>               | R <sub>1</sub> = 0.0389, wR <sub>2</sub> = 0.0647              |
| <b>Final R indexes [all data]</b>                 | R <sub>1</sub> = 0.0474, wR <sub>2</sub> = 0.0675              |
| <b>Largest diff. peak/hole / e Å<sup>-3</sup></b> | 0.61/-0.51                                                     |



## S14. DFT calculations

### S14.1 Experimental

All of the calculations were performed using the Gaussian09 series of programs.<sup>24</sup> For Et<sub>3</sub>PO and hydride affinity calculations, geometry optimisations were carried out with three different functionals: B3PW91<sup>25</sup>, M06-2X<sup>26</sup> and B3LYP<sup>25a,27</sup>-D3BJ<sup>28</sup>. The rest of the optimisations were completed with the B3PW91 functional. Calculations were run with a 6-311G(d,p) (for H, B, C, N, O, F) basis set and a LANL2DZ (for Zn) basis set. All geometry optimizations were full, with no restrictions. Stationary points located in the potential energy surface were characterized as minima (no imaginary frequencies) by vibrational analysis. Solvent effects of chlorobenzene were introduced using the self consistent field approach, by means of the integral equation formalism polarizable continuum model (IEFPCM).<sup>29</sup>

## S14.2 Energy profiles (Lewis acidity towards O=PEt<sub>3</sub>)

### B3PW91

|                 | BCF          | [DIPPZnC <sub>6</sub> F <sub>5</sub> -OPEt <sub>3</sub> ] <sup>+</sup> | [DIPPZnC <sub>6</sub> F <sub>5</sub> ] <sup>+</sup> | BCF-OPEt <sub>3</sub> | Δ<br>(kcal/mol) |
|-----------------|--------------|------------------------------------------------------------------------|-----------------------------------------------------|-----------------------|-----------------|
| <b>E</b> (a.u.) | -2208.014054 | -2607.38472                                                            | -1953.110479                                        | -2862.287542          | 0.47            |
| <b>H</b> (a.u.) | -2207.830083 | -2606.502494                                                           | -1952.445131                                        | -2861.885382          | 1.30            |
| <b>G</b> (a.u.) | -2207.922291 | -2606.650806                                                           | -1952.560523                                        | -2862.002606          | 6.26            |

*N.B.* BCF = B(C<sub>6</sub>F<sub>5</sub>)<sub>3</sub>

### M06-2X

|                 | BCF          | [DIPPZnC <sub>6</sub> F <sub>5</sub> -OPEt <sub>3</sub> ] <sup>+</sup> | [DIPPZnC <sub>6</sub> F <sub>5</sub> ] <sup>+</sup> | BCF-OPEt <sub>3</sub> | Δ<br>(kcal/mol) |
|-----------------|--------------|------------------------------------------------------------------------|-----------------------------------------------------|-----------------------|-----------------|
| <b>E</b> (a.u.) | -2208.161823 | -2607.21323537                                                         | -1952.94101248                                      | -2862.43853297        | -2.82           |
| <b>H</b> (a.u.) | -2207.975244 | -2606.323785                                                           | -1952.27032100                                      | -2862.031626          | -1.83           |
| <b>G</b> (a.u.) | -2208.064031 | -2606.462424                                                           | -1952.38450000                                      | -2862.143268          | -0.82           |

### B3LYP-D3BJ

|                 | BCF          | [DIPPZnC <sub>6</sub> F <sub>5</sub> -OPEt <sub>3</sub> ] <sup>+</sup> | [DIPPZnC <sub>6</sub> F <sub>5</sub> ] <sup>+</sup> | BCF-OPEt <sub>3</sub> | Δ<br>(kcal/mol) |
|-----------------|--------------|------------------------------------------------------------------------|-----------------------------------------------------|-----------------------|-----------------|
| <b>E</b> (a.u.) | -2208.949068 | -2608.536022                                                           | -1954.024284                                        | -2863.457577          | 2.03            |
| <b>H</b> (a.u.) | -2208.766029 | -2607.65205                                                            | -1953.35803                                         | -2863.055931          | 2.58            |
| <b>G</b> (a.u.) | -2208.857431 | -2607.792586                                                           | -1953.471727                                        | -2863.171211          | 4.44            |

## S14.2 Energy profiles (Hydride ion affinity)

### B3PW91

|                 | BCF          | DIPPZnC <sub>6</sub> F <sub>5</sub> (H) | [DIPPZnC <sub>6</sub> F <sub>5</sub> ] <sup>+</sup> | [HBCF] <sup>-</sup> | Δ (kcal/mol) |
|-----------------|--------------|-----------------------------------------|-----------------------------------------------------|---------------------|--------------|
| <b>E</b> (a.u.) | -2208.014054 | -1953.82329790                          | -1953.1104791                                       | -2208.765205        | -24.05       |
| <b>H</b> (a.u.) | -2207.830083 | -1953.154888                            | -1952.445131                                        | -2208.572601        | -20.56       |
| <b>G</b> (a.u.) | -2207.922291 | -1953.279594                            | -1952.560523                                        | -2208.665243        | -14.99       |

*N.B. [HBCF]<sup>-</sup> = [HB(C<sub>6</sub>F<sub>5</sub>)<sub>3</sub>]<sup>-</sup>*

### M06-2X

|                 | BCF          | DIPPZnC <sub>6</sub> F <sub>5</sub> (H) | [DIPPZnC <sub>6</sub> F <sub>5</sub> ] <sup>+</sup> | [HBCF] <sup>-</sup> | Δ (kcal/mol) |
|-----------------|--------------|-----------------------------------------|-----------------------------------------------------|---------------------|--------------|
| <b>E</b> (a.u.) | -2208.161823 | -1953.66754290                          | -1952.94101248                                      | -2208.91374         | -15.93       |
| <b>H</b> (a.u.) | -2207.975244 | -1952.993503                            | -1952.270321                                        | -2208.718135        | -12.37       |
| <b>G</b> (a.u.) | -2208.064031 | -1953.106644                            | -1952.3845                                          | -2208.808863        | -14.24       |

### B3LYP-D3BJ

|                 | BCF          | DIPPZnC <sub>6</sub> F <sub>5</sub> (H) | [DIPPZnC <sub>6</sub> F <sub>5</sub> ] <sup>+</sup> | [HBCF] <sup>-</sup> | Δ (kcal/mol) |
|-----------------|--------------|-----------------------------------------|-----------------------------------------------------|---------------------|--------------|
| <b>E</b> (a.u.) | -2208.949068 | -1954.750477                            | -1954.024284                                        | -2209.699723        | -15.35       |
| <b>H</b> (a.u.) | -2208.766029 | -1954.081394                            | -1953.35803                                         | -2209.508235        | -11.82       |
| <b>G</b> (a.u.) | -2208.857431 | -1954.199564                            | -1953.471727                                        | -2209.599746        | -9.08        |

S14.3 Lowest energy unoccupied molecular orbitals with significant boron character

**HBCat**

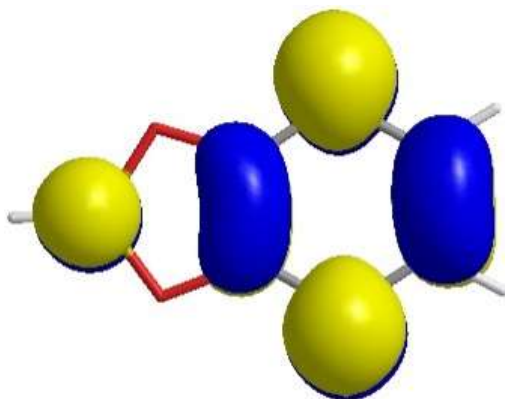

**Figure S71:** Representation of HBCat LUMO.

**[DIPPZnH-HBCat]<sup>+</sup>**

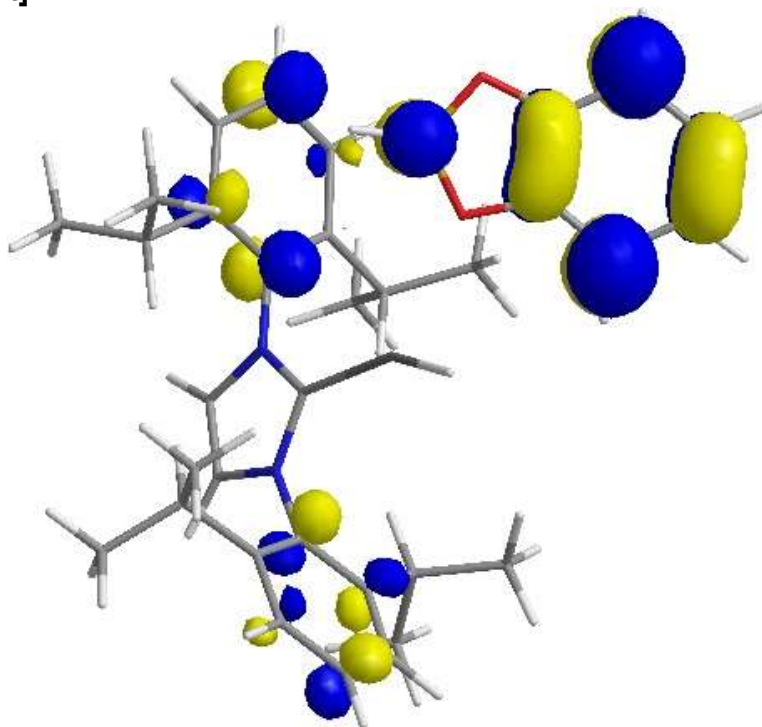

**Figure S72:** Representation of [DIPPZnH-HBCat]<sup>+</sup> LUMO+4.

**HBPIn**

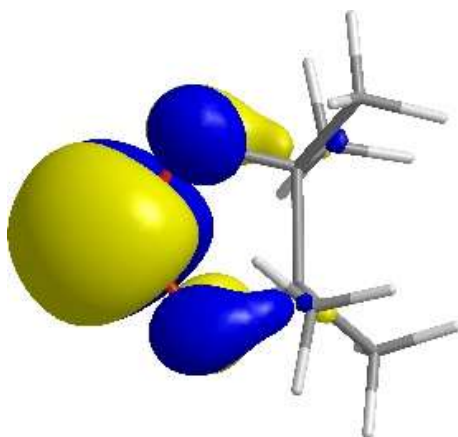

**Figure S73:** Representation of HBPIn LUMO.

**[DIPPZnH-HBPin]<sup>+</sup>**

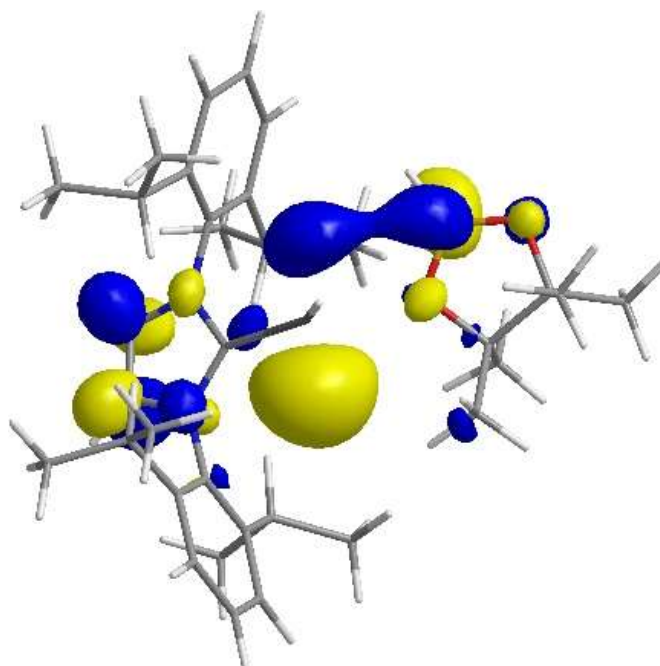

**Figure S74:** Representation of [DIPPZnH-HBPin]<sup>+</sup> LUMO.

#### S14.4 Coordinates of optimised structures

##### **DIPPZnC6F5-B3PW91**

|    |            |            |            |
|----|------------|------------|------------|
| Zn | 3.1382090  | 6.5684810  | 9.0363540  |
| N  | 3.2774630  | 7.1773140  | 5.9380310  |
| N  | 2.9294820  | 8.9134030  | 7.1540770  |
| C  | 3.1169350  | 7.5751710  | 7.2187400  |
| C  | 3.5109520  | 5.8186860  | 5.5066940  |
| C  | 2.4014030  | 5.0235320  | 5.1762530  |
| C  | 1.4242680  | 10.0125250 | 8.7450510  |
| C  | 3.1899990  | 8.2563200  | 5.0802280  |
| H  | 3.2898220  | 8.1495690  | 4.0133790  |
| C  | 2.9714250  | 9.3528910  | 5.8478280  |
| H  | 2.8483490  | 10.3895570 | 5.5830310  |
| C  | 2.7365600  | 9.7444590  | 8.3186470  |
| C  | 0.9725790  | 5.5369070  | 5.2252250  |
| H  | 0.9736130  | 6.5084790  | 5.7269100  |
| C  | 6.0368540  | 6.2632140  | 5.6701110  |
| H  | 5.6784620  | 7.1775290  | 6.1507540  |
| C  | 4.8384430  | 5.3725670  | 5.3909770  |
| C  | 0.1961180  | 9.5372010  | 7.9877700  |
| H  | 0.5191120  | 8.8205340  | 7.2271190  |
| C  | 3.8755850  | 10.2250250 | 8.9872770  |
| C  | 1.2764020  | 10.7775150 | 9.9032750  |
| H  | 0.2807770  | 11.0082380 | 10.2654100 |
| C  | 2.6583200  | 3.7227840  | 4.7390130  |
| H  | 1.8289490  | 3.0779330  | 4.4712320  |
| C  | 3.6638200  | 10.9733810 | 10.1470030 |
| H  | 4.5171810  | 11.3555710 | 10.6964110 |
| C  | 5.0322680  | 4.0626560  | 4.9491540  |
| H  | 6.0413540  | 3.6803050  | 4.8435410  |
| C  | 0.0483840  | 4.6130090  | 6.0268760  |
| H  | -0.0702750 | 3.6401020  | 5.5423300  |
| H  | -0.9461730 | 5.0596920  | 6.1097500  |
| H  | 0.4268350  | 4.4375050  | 7.0374790  |
| C  | 3.9567280  | 3.2458250  | 4.6302430  |
| H  | 4.1325520  | 2.2326280  | 4.2850230  |
| C  | 5.2911690  | 9.9930640  | 8.4874100  |
| H  | 5.2360790  | 9.4417530  | 7.5451980  |
| C  | 2.3812680  | 11.2445390 | 10.6017030 |

|   |            |            |            |
|---|------------|------------|------------|
| H | 2.2408730  | 11.8300900 | 11.5039900 |
| C | -0.8079460 | 8.8177470  | 8.8960630  |
| H | -0.3463250 | 7.9926770  | 9.4443160  |
| H | -1.6264910 | 8.4103190  | 8.2965090  |
| H | -1.2491920 | 9.4979010  | 9.6295960  |
| C | 7.0433440  | 5.6105190  | 6.6245000  |
| H | 6.5751030  | 5.3034140  | 7.5631440  |
| H | 7.8441930  | 6.3163290  | 6.8608040  |
| H | 7.5090570  | 4.7269650  | 6.1795970  |
| C | 0.4304220  | 5.7528930  | 3.8046190  |
| H | 1.0577040  | 6.4426480  | 3.2338220  |
| H | -0.5813740 | 6.1662550  | 3.8435870  |
| H | 0.3872440  | 4.8077390  | 3.2554440  |
| C | 6.1084160  | 9.1452890  | 9.4691990  |
| H | 6.1924480  | 9.6318450  | 10.4451220 |
| H | 7.1207790  | 8.9920730  | 9.0856000  |
| H | 5.6589860  | 8.1607200  | 9.6268740  |
| C | -0.4757970 | 10.7114790 | 7.2615380  |
| H | -0.8383360 | 11.4550180 | 7.9774630  |
| H | -1.3325290 | 10.3576090 | 6.6812390  |
| H | 0.2149730  | 11.2126380 | 6.5789460  |
| C | 6.7210090  | 6.6741720  | 4.3577970  |
| H | 7.1209680  | 5.8006110  | 3.8346280  |
| H | 7.5531770  | 7.3538620  | 4.5623030  |
| H | 6.0271930  | 7.1803450  | 3.6818170  |
| C | 5.9922930  | 11.3246740 | 8.1869880  |
| H | 5.4193730  | 11.9235260 | 7.4741110  |
| H | 6.9817460  | 11.1396560 | 7.7597440  |
| H | 6.1283910  | 11.9202840 | 9.0939840  |
| C | 3.1463900  | 5.6460860  | 10.8694520 |
| C | 1.9883840  | 5.2228520  | 11.4900870 |
| C | 4.3349280  | 5.3600140  | 11.5114170 |
| C | 1.9885890  | 4.5550130  | 12.7061920 |
| C | 4.3929720  | 4.6980540  | 12.7290130 |
| C | 3.2046960  | 4.2948610  | 13.3249940 |
| F | 0.7916770  | 5.4463400  | 10.9044170 |
| F | 0.8538710  | 4.1554690  | 13.2836340 |
| F | 3.2317820  | 3.6537640  | 14.4908350 |
| F | 5.5562070  | 4.4357560  | 13.3277870 |
| F | 5.5064070  | 5.7237920  | 10.9432640 |

**DIPPZnC6F5H-B3PW91**

|    |            |            |            |
|----|------------|------------|------------|
| Zn | 0.3074560  | -0.0165850 | -1.6578350 |
| N  | 2.3168920  | 0.0378280  | 0.8237300  |
| N  | 0.4226860  | 0.7324630  | 1.5330680  |
| C  | 1.0383270  | 0.2565650  | 0.4196280  |
| C  | 3.3812130  | -0.4655820 | -0.0087340 |
| C  | 4.2321090  | 0.4577600  | -0.6378540 |
| C  | -1.3441170 | 2.3937840  | 1.1953970  |
| C  | 2.4947080  | 0.3691610  | 2.1546930  |
| H  | 3.4422390  | 0.2596910  | 2.6548400  |
| C  | 1.2977300  | 0.8128160  | 2.6020390  |
| H  | 0.9943730  | 1.1731630  | 3.5701960  |
| C  | -0.9661730 | 1.1087100  | 1.6198200  |
| C  | 4.0658810  | 1.9610210  | -0.4960440 |
| H  | 3.1350050  | 2.1493300  | 0.0448930  |
| C  | 2.6653840  | -2.8577560 | 0.5969160  |
| H  | 1.8352930  | -2.3121740 | 1.0525260  |
| C  | 3.5516070  | -1.8547130 | -0.1219680 |
| C  | -0.3332130 | 3.4195470  | 0.7102170  |
| H  | 0.5646220  | 2.8820060  | 0.3931870  |
| C  | -1.8750290 | 0.1909810  | 2.1714700  |
| C  | -2.6938850 | 2.7324670  | 1.3016950  |
| H  | -3.0251760 | 3.7121460  | 0.9769990  |
| C  | 5.2764950  | -0.0527820 | -1.4097590 |
| H  | 5.9507890  | 0.6322410  | -1.9125490 |
| C  | -3.2113500 | 0.5858280  | 2.2573380  |
| H  | -3.9428820 | -0.0973160 | 2.6748390  |
| C  | 4.6103200  | -2.3091800 | -0.9109930 |
| H  | 4.7704240  | -3.3760260 | -1.0236610 |
| C  | 3.9459000  | 2.6530460  | -1.8590180 |
| H  | 4.8685390  | 2.5601000  | -2.4392470 |
| H  | 3.7493780  | 3.7205350  | -1.7215980 |
| H  | 3.1312060  | 2.2239110  | -2.4468620 |
| C  | 5.4636650  | -1.4205600 | -1.5487020 |
| H  | 6.2800860  | -1.7961360 | -2.1567850 |
| C  | -1.4482410 | -1.1586530 | 2.7254800  |
| H  | -0.4229220 | -1.3505100 | 2.3983670  |
| C  | -3.6192280 | 1.8375350  | 1.8202170  |
| H  | -4.6642190 | 2.1209390  | 1.8908070  |
| C  | -0.8251810 | 4.2292170  | -0.4932000 |
| H  | -1.1775170 | 3.5802440  | -1.2971360 |



|   |            |            |            |
|---|------------|------------|------------|
| H | -0.0105820 | 4.8469560  | -0.8816900 |
| H | -1.6413090 | 4.9053320  | -0.2216120 |
| C | 2.0609100  | -3.8873010 | -0.3646510 |
| H | 1.5011400  | -3.4063530 | -1.1699050 |
| H | 1.3742180  | -4.5459030 | 0.1747230  |
| H | 2.8323460  | -4.5157130 | -0.8189990 |
| C | 5.2109220  | 2.5639520  | 0.3292820  |
| H | 5.2780380  | 2.1058920  | 1.3198670  |
| H | 5.0586710  | 3.6392480  | 0.4622640  |
| H | 6.1735450  | 2.4213480  | -0.1713370 |
| C | -2.3115320 | -2.3164120 | 2.2145190  |
| H | -3.3538180 | -2.2175970 | 2.5310100  |
| H | -1.9368490 | -3.2619470 | 2.6176020  |
| H | -2.2892440 | -2.3845410 | 1.1263690  |
| C | 0.0664320  | 4.3529640  | 1.8633140  |
| H | -0.7993740 | 4.9218850  | 2.2164210  |
| H | 0.8273560  | 5.0657860  | 1.5314460  |
| H | 0.4711820  | 3.7967550  | 2.7129020  |
| C | 3.4386700  | -3.5529940 | 1.7264190  |
| H | 4.2773160  | -4.1328770 | 1.3285250  |
| H | 2.7828590  | -4.2403830 | 2.2689510  |
| H | 3.8404870  | -2.8305100 | 2.4419860  |
| C | -1.4495570 | -1.1254230 | 4.2615370  |
| H | -0.8091480 | -0.3301460 | 4.6518550  |
| H | -1.0911770 | -2.0777680 | 4.6635390  |
| H | -2.4603840 | -0.9566050 | 4.6453950  |
| C | -1.7569530 | -0.5420620 | -1.8382330 |
| C | -2.6986370 | 0.3672810  | -2.2704410 |
| C | -2.2348350 | -1.8149180 | -1.6157640 |
| C | -4.0400960 | 0.0643350  | -2.4593880 |
| C | -3.5611970 | -2.1868380 | -1.7821890 |
| C | -4.4712880 | -1.2302990 | -2.2082700 |
| F | -2.3296230 | 1.6466090  | -2.5429550 |
| F | -4.9222510 | 0.9848770  | -2.8750230 |
| F | -5.7578530 | -1.5548370 | -2.3769300 |
| F | -3.9818460 | -3.4358510 | -1.5328670 |
| F | -1.3878350 | -2.7937980 | -1.1954910 |
| H | 1.3689300  | 0.2419950  | -2.9136280 |

### **BCF-B3PW91**

|   |           |            |           |
|---|-----------|------------|-----------|
| B | 0.0001040 | -0.0002740 | 0.0010290 |
|---|-----------|------------|-----------|

|   |            |            |            |
|---|------------|------------|------------|
| C | 1.2048280  | -0.9984220 | 0.0010140  |
| C | -1.4669590 | -0.5443250 | 0.0008030  |
| C | 2.3476660  | -0.7787720 | -0.7717130 |
| C | 3.4172810  | -1.6579390 | -0.7932200 |
| C | 3.3749220  | -2.7970050 | -0.0008440 |
| C | 2.2643430  | -3.0505280 | 0.7925610  |
| C | 1.2020600  | -2.1625040 | 0.7731770  |
| C | -1.8490690 | -1.6421580 | -0.7737800 |
| C | -3.1454350 | -2.1283750 | -0.7949940 |
| C | -4.1097070 | -1.5233840 | -0.0004490 |
| C | -3.7729420 | -0.4365220 | 0.7947930  |
| C | -2.4726480 | 0.0391960  | 0.7748620  |
| C | 1.2708380  | 2.1217690  | 0.7737560  |
| C | 0.2620500  | 1.5422260  | 0.0006870  |
| C | -0.4987250 | 2.4218670  | -0.7730310 |
| C | -0.2721560 | 3.7878020  | -0.7943460 |
| C | 0.7345710  | 4.3207040  | -0.0008470 |
| C | 1.5087140  | 3.4857490  | 0.7933260  |
| F | 2.2327810  | -4.1383100 | 1.5586290  |
| F | 4.3952480  | -3.6428900 | -0.0018030 |
| F | 4.4796590  | -1.4242640 | -1.5599320 |
| F | 2.4303150  | 0.2970990  | -1.5601890 |
| F | 0.1615550  | -2.4436560 | 1.5632410  |
| F | -3.4755100 | -3.1634490 | -1.5636420 |
| F | -5.3525520 | -1.9838400 | -0.0010350 |
| F | -4.6983780 | 0.1333750  | 1.5628670  |
| F | -2.1947080 | 1.0796930  | 1.5662200  |
| F | -0.9594190 | -2.2501340 | -1.5644130 |
| F | 2.0338730  | 1.3611040  | 1.5644230  |
| F | 2.4658210  | 4.0024450  | 1.5602120  |
| F | 0.9568300  | 5.6273110  | -0.0015400 |
| F | -1.0047400 | 4.5909870  | -1.5620260 |
| F | -1.4705860 | 1.9550960  | -1.5627550 |

#### **HBCF-B3PW91**

|   |            |            |            |
|---|------------|------------|------------|
| B | -0.0514060 | 0.0650890  | -0.7773790 |
| C | -0.1967600 | 1.5831980  | -0.1816030 |
| C | 1.4246610  | -0.5938450 | -0.5189490 |
| C | -1.0506420 | 2.4858870  | -0.8097130 |
| C | -1.2076740 | 3.8061600  | -0.4111490 |

|   |            |            |            |
|---|------------|------------|------------|
| C | -0.4867850 | 4.2786310  | 0.6733040  |
| C | 0.3700100  | 3.4183420  | 1.3393570  |
| C | 0.4921870  | 2.1040610  | 0.9076560  |
| C | 2.4806170  | -0.2685200 | -1.3656560 |
| C | 3.7538930  | -0.8101710 | -1.2549860 |
| C | 4.0167440  | -1.7291770 | -0.2523410 |
| C | 3.0022130  | -2.0810510 | 0.6222310  |
| C | 1.7450100  | -1.5097190 | 0.4765340  |
| C | -2.0060560 | -0.8298610 | 0.8506270  |
| C | -1.2812500 | -0.9194020 | -0.3322280 |
| C | -1.6997840 | -1.9323200 | -1.1905610 |
| C | -2.7594530 | -2.7865930 | -0.9174310 |
| C | -3.4568260 | -2.6462020 | 0.2711220  |
| C | -3.0748030 | -1.6589210 | 1.1641450  |
| F | 1.0628410  | 3.8628780  | 2.3976400  |
| F | -0.6216570 | 5.5472960  | 1.0756590  |
| F | -2.0437990 | 4.6291140  | -1.0601470 |
| F | -1.7882520 | 2.0994060  | -1.8673580 |
| F | 1.3239930  | 1.3288590  | 1.6289860  |
| F | 4.7299870  | -0.4590410 | -2.1043410 |
| F | 5.2361450  | -2.2647910 | -0.1271000 |
| F | 3.2496420  | -2.9605970 | 1.6034180  |
| F | 0.8254850  | -1.8839990 | 1.3859890  |
| F | 2.3041860  | 0.6192950  | -2.3620580 |
| F | -1.6821440 | 0.0832420  | 1.7855600  |
| F | -3.7356460 | -1.5231160 | 2.3227830  |
| F | -4.4815920 | -3.4577340 | 0.5554290  |
| F | -3.1179240 | -3.7421460 | -1.7869050 |
| F | -1.0701470 | -2.1341350 | -2.3632430 |
| H | -0.1471060 | 0.1803120  | -1.9768800 |

**DIPPZnC6F5-OPEt3-B3PW91**

|    |           |            |           |
|----|-----------|------------|-----------|
| Zn | 3.3736520 | 6.4008600  | 8.8777360 |
| N  | 3.2577180 | 7.2274760  | 5.9030800 |
| N  | 2.9376160 | 8.9260340  | 7.1815880 |
| C  | 3.1358490 | 7.5883360  | 7.1996560 |
| C  | 3.4645450 | 5.8715160  | 5.4475420 |
| C  | 2.3367340 | 5.0955770  | 5.1292650 |
| C  | 1.4028930 | 10.0280530 | 8.7371060 |
| C  | 3.1382450 | 8.3278540  | 5.0781160 |
| H  | 3.2067610 | 8.2522920  | 4.0060700 |
| C  | 2.9374430 | 9.3993380  | 5.8851990 |

|   |            |            |            |
|---|------------|------------|------------|
| H | 2.7970010  | 10.4421840 | 5.6561140  |
| C | 2.7254170  | 9.7460510  | 8.3536180  |
| C | 0.9168640  | 5.6315430  | 5.1958470  |
| H | 0.9407480  | 6.6066510  | 5.6895330  |
| C | 5.9988260  | 6.2510270  | 5.6315930  |
| H | 5.6567620  | 7.2603680  | 5.8753270  |
| C | 4.7808720  | 5.3981060  | 5.3256160  |
| C | 0.1921220  | 9.5394270  | 7.9603400  |
| H | 0.5329290  | 8.8213580  | 7.2092400  |
| C | 3.8448090  | 10.2430100 | 9.0408730  |
| C | 1.2244320  | 10.8219140 | 9.8711330  |
| H | 0.2194400  | 11.0627930 | 10.1993380 |
| C | 2.5656990  | 3.7879630  | 4.6977640  |
| H | 1.7221600  | 3.1578940  | 4.4391670  |
| C | 3.6032500  | 11.0239530 | 10.1728890 |
| H | 4.4421050  | 11.4197200 | 10.7349090 |
| C | 4.9465910  | 4.0792780  | 4.8979110  |
| H | 5.9475770  | 3.6743030  | 4.7978920  |
| C | -0.0098790 | 4.7300640  | 6.0202110  |
| H | -0.1448540 | 3.7515400  | 5.5515900  |
| H | -0.9980340 | 5.1903450  | 6.1054480  |
| H | 0.3745270  | 4.5661970  | 7.0305170  |
| C | 3.8536380  | 3.2823280  | 4.5896420  |
| H | 4.0065690  | 2.2619370  | 4.2548890  |
| C | 5.2734510  | 9.9796850  | 8.6004070  |
| H | 5.2446820  | 9.3697830  | 7.6935530  |
| C | 2.3100000  | 11.3093990 | 10.5852070 |
| H | 2.1463920  | 11.9214330 | 11.4657250 |
| C | -0.8180170 | 8.8143990  | 8.8571420  |
| H | -0.3552050 | 7.9906100  | 9.4064440  |
| H | -1.6290670 | 8.4044380  | 8.2490810  |
| H | -1.2682230 | 9.4915190  | 9.5879790  |
| C | 6.7565650  | 5.7123630  | 6.8512210  |
| H | 6.1100830  | 5.6608630  | 7.7322080  |
| H | 7.6047600  | 6.3588240  | 7.0923780  |
| H | 7.1446530  | 4.7064810  | 6.6673270  |
| C | 0.3551480  | 5.8437380  | 3.7823300  |
| H | 0.9858310  | 6.5153190  | 3.1939590  |
| H | -0.6476770 | 6.2770090  | 3.8341490  |
| H | 0.2839820  | 4.8942630  | 3.2435640  |
| C | 6.0410930  | 9.1902710  | 9.6662360  |

|   |            |            |            |
|---|------------|------------|------------|
| H | 6.1455550  | 9.7650260  | 10.5906280 |
| H | 7.0459220  | 8.9440830  | 9.3122680  |
| H | 5.5293630  | 8.2567730  | 9.9159190  |
| C | -0.4775510 | 10.7025680 | 7.2141710  |
| H | -0.8557060 | 11.4512160 | 7.9165080  |
| H | -1.3232600 | 10.3373580 | 6.6247530  |
| H | 0.2190590  | 11.2021310 | 6.5358590  |
| C | 6.9228020  | 6.3706880  | 4.4131660  |
| H | 7.3455480  | 5.4018950  | 4.1327630  |
| H | 7.7556680  | 7.0426690  | 4.6382120  |
| H | 6.3893560  | 6.7687100  | 3.5460900  |
| C | 5.9971000  | 11.2844110 | 8.2443460  |
| H | 5.4649540  | 11.8345930 | 7.4638820  |
| H | 7.0058410  | 11.0680200 | 7.8815340  |
| H | 6.0904000  | 11.9391730 | 9.1153050  |
| C | 3.4069810  | 5.4877500  | 10.7156110 |
| C | 2.2400550  | 5.0887720  | 11.3357360 |
| C | 4.5859300  | 5.2347200  | 11.3874360 |
| C | 2.2219260  | 4.4717410  | 12.5780100 |
| C | 4.6257550  | 4.6227450  | 12.6317850 |
| C | 3.4290250  | 4.2411100  | 13.2254750 |
| F | 1.0517910  | 5.2915660  | 10.7242340 |
| F | 1.0788180  | 4.0965050  | 13.1554100 |
| F | 3.4393150  | 3.6503510  | 14.4180240 |
| F | 5.7794870  | 4.3916150  | 13.2611390 |
| F | 5.7632690  | 5.5872800  | 10.8260210 |

**BCF-OPet3-B3PW91**

|   |            |            |            |
|---|------------|------------|------------|
| B | 0.0664290  | 0.1343030  | 0.1366330  |
| C | 1.5913460  | 0.6315920  | -0.2296820 |
| C | 2.0602210  | 1.9342070  | -0.0839780 |
| C | 2.5645540  | -0.2822450 | -0.6236180 |
| C | 3.3704560  | 2.3132470  | -0.3552880 |
| C | 3.8798100  | 0.0473300  | -0.9055380 |
| C | 4.2872980  | 1.3654950  | -0.7745130 |
| C | -1.0161540 | 1.3709240  | 0.2409560  |
| C | -1.2615440 | 2.1386400  | -0.8958470 |
| C | -1.7962390 | 1.7102390  | 1.3395570  |
| C | -2.1899480 | 3.1639020  | -0.9593570 |
| C | -2.7413570 | 2.7309330  | 1.3209080  |
| C | -2.9424100 | 3.4639300  | 0.1654720  |
| C | -0.6135120 | -0.9082670 | -0.9539250 |

|   |            |            |            |
|---|------------|------------|------------|
| C | -0.2310860 | -1.0869500 | -2.2819280 |
| C | -1.7753050 | -1.5912820 | -0.6029190 |
| C | -0.9135120 | -1.9074750 | -3.1723140 |
| C | -2.4847280 | -2.4242000 | -1.4537590 |
| C | -2.0453790 | -2.5878850 | -2.7569590 |
| F | 1.2589600  | 2.9220880  | 0.3465660  |
| F | 3.7539060  | 3.5842560  | -0.2052950 |
| F | 5.5475300  | 1.7112100  | -1.0338590 |
| F | 4.7572080  | -0.8884530 | -1.2798160 |
| F | 2.2554030  | -1.5914530 | -0.7315240 |
| F | -2.2811390 | -1.4621720 | 0.6427340  |
| F | -3.5754640 | -3.0684080 | -1.0279690 |
| F | -2.7041340 | -3.3834300 | -3.5979540 |
| F | -0.4872040 | -2.0435190 | -4.4307470 |
| F | 0.8341810  | -0.4547700 | -2.7938360 |
| F | -0.5535910 | 1.9081680  | -2.0165740 |
| F | -1.6862680 | 1.0635020  | 2.5131560  |
| F | -3.4606900 | 3.0069920  | 2.4143760  |
| F | -3.8450950 | 4.4450980  | 0.1335280  |
| F | -2.3646280 | 3.8641990  | -2.0841660 |
| P | 0.4163580  | -1.7799990 | 2.4020660  |
| O | 0.2059250  | -0.5279860 | 1.5140380  |
| C | 0.5393460  | -3.3346510 | 1.4430450  |
| H | 1.4239550  | -3.8515550 | 1.8276440  |
| H | 0.7812830  | -3.0302030 | 0.4224260  |
| C | 1.9517390  | -1.5963040 | 3.3536610  |
| H | 1.8314390  | -0.6902100 | 3.9545590  |
| H | 1.9594570  | -2.4413410 | 4.0528570  |
| C | -0.9279060 | -1.9235720 | 3.6176380  |
| H | -0.9113600 | -2.9594060 | 3.9720770  |
| H | -1.8545880 | -1.7930870 | 3.0542490  |
| C | 3.2473780  | -1.5342550 | 2.5499320  |
| H | 3.3798940  | -2.4026430 | 1.9009800  |
| H | 3.2819900  | -0.6357930 | 1.9332180  |
| H | 4.0966710  | -1.5002600 | 3.2355630  |
| C | -0.8549050 | -0.9539960 | 4.7979570  |
| H | -1.7615110 | -1.0538300 | 5.3987420  |
| H | -0.0046990 | -1.1719130 | 5.4473370  |
| H | -0.7878740 | 0.0827060  | 4.4683960  |
| C | -0.6656930 | -4.2766540 | 1.4665800  |
| H | -1.5812700 | -3.7933430 | 1.1258250  |

|   |            |            |           |
|---|------------|------------|-----------|
| H | -0.4677200 | -5.1202310 | 0.8017070 |
| H | -0.8461820 | -4.6825210 | 2.4639220 |

### **HBPIn-B3PW91**

|   |            |            |            |
|---|------------|------------|------------|
| C | -0.7843830 | -0.1908260 | -0.0480530 |
| C | 0.7844240  | -0.1907320 | 0.0480570  |
| B | -0.0001120 | 1.9406030  | -0.0000290 |
| H | -0.0001690 | 3.1299830  | -0.0001030 |
| C | -1.4723370 | -0.4639680 | 1.2863100  |
| H | -2.5394360 | -0.2536630 | 1.1830620  |
| H | -1.3553340 | -1.5070040 | 1.5898950  |
| H | -1.0752520 | 0.1762600  | 2.0777140  |
| C | 1.3627630  | -1.0819600 | 1.1337540  |
| H | 1.1145850  | -2.1303130 | 0.9458540  |
| H | 2.4514590  | -0.9888660 | 1.1397030  |
| H | 0.9924170  | -0.8068210 | 2.1218760  |
| C | 1.4723990  | -0.4638810 | -1.2862930 |
| H | 2.5394720  | -0.2534390 | -1.1830690 |
| H | 1.3555210  | -1.5069520 | -1.5898070 |
| H | 1.0752270  | 0.1762450  | -2.0777370 |
| C | -1.3626120 | -1.0821840 | -1.1337010 |
| H | -1.1143250 | -2.1305000 | -0.9457330 |
| H | -2.4513180 | -0.9892060 | -1.1396700 |
| H | -0.9922830 | -0.8070670 | -2.1218350 |
| O | 1.0759540  | 1.1994170  | 0.3861650  |
| O | -1.0760670 | 1.1992690  | -0.3862470 |

### **DIPPZnH-HBCat-H-bound-B3PW91**

|    |           |            |           |
|----|-----------|------------|-----------|
| Zn | 2.2374310 | 5.9291960  | 9.4260120 |
| N  | 3.2750880 | 7.1531790  | 6.8116530 |
| N  | 2.6987640 | 8.6922350  | 8.2015250 |
| C  | 2.7852440 | 7.3527790  | 8.0536810 |
| C  | 3.5319090 | 5.8595490  | 6.2211300 |
| C  | 2.5059870 | 5.2439540  | 5.4834880 |
| C  | 0.8435640 | 9.6655870  | 9.4688940 |
| C  | 3.4973220 | 8.3611410  | 6.1827970 |
| H  | 3.8858060 | 8.4221470  | 5.1803810 |
| C  | 3.1336210 | 9.3312890  | 7.0583460 |
| H  | 3.1439960 | 10.4042220 | 6.9679970 |
| C  | 2.2127610 | 9.3604220  | 9.3879050 |

|   |            |            |            |
|---|------------|------------|------------|
| C | 1.1515680  | 5.8916280  | 5.2483640  |
| C | 5.9398550  | 6.0043340  | 7.1086990  |
| H | 5.5136610  | 6.8392540  | 7.6724740  |
| C | 4.8107640  | 5.2973160  | 6.3782830  |
| C | -0.1439860 | 9.3558630  | 8.3568990  |
| H | 0.3644960  | 8.7467120  | 7.6046070  |
| C | 3.1377420  | 9.7005290  | 10.3900900 |
| C | 0.4051460  | 10.3176660 | 10.6228810 |
| H | -0.6443160 | 10.5707540 | 10.7248710 |
| C | 2.7912830  | 4.0023500  | 4.9122610  |
| H | 2.0278760  | 3.4935720  | 4.3344880  |
| C | 2.6390520  | 10.3520980 | 11.5193760 |
| H | 3.3194750  | 10.6338750 | 12.3148240 |
| C | 5.0357120  | 4.0555960  | 5.7818560  |
| H | 6.0088380  | 3.5874930  | 5.8773060  |
| C | 4.0386050  | 3.4134140  | 5.0614540  |
| H | 4.2379620  | 2.4492010  | 4.6063450  |
| C | 4.6291250  | 9.4387220  | 10.2624990 |
| H | 4.7884610  | 8.7742540  | 9.4082370  |
| C | 1.2897130  | 10.6541340 | 11.6373460 |
| H | 0.9259900  | 11.1622390 | 12.5239510 |
| H | 3.0700900  | 4.7011640  | 10.6625690 |
| H | 1.0049800  | 4.9729910  | 10.3392140 |
| B | 1.9240950  | 4.3091880  | 11.0306660 |
| O | 1.7414490  | 2.8931030  | 10.7812650 |
| O | 1.7025310  | 4.5696360  | 12.4396940 |
| C | 1.3308980  | 2.3775070  | 11.9749950 |
| C | 1.3073880  | 3.3726070  | 12.9589960 |
| C | 0.9810100  | 1.0732850  | 12.2609030 |
| H | 1.0049190  | 0.3086100  | 11.4927590 |
| C | 0.9327740  | 3.0929480  | 14.2577170 |
| C | 0.5989940  | 0.7811380  | 13.5786720 |
| H | 0.3184590  | -0.2347930 | 13.8347910 |
| C | 0.5751900  | 1.7697560  | 14.5560120 |
| H | 0.2762310  | 1.5183220  | 15.5678590 |
| H | 0.9199490  | 3.8699560  | 15.0136710 |
| H | 1.0690750  | 6.7622350  | 5.9054590  |
| C | 6.9418350  | 6.5907350  | 6.1024030  |
| H | 6.4567040  | 7.2678810  | 5.3947610  |
| H | 7.7228910  | 7.1489210  | 6.6262450  |
| H | 7.4242220  | 5.7948990  | 5.5272040  |



|   |            |            |            |
|---|------------|------------|------------|
| C | 6.6557350  | 5.0941460  | 8.1130560  |
| H | 7.1911530  | 4.2818090  | 7.6143860  |
| H | 7.3940070  | 5.6711070  | 8.6765940  |
| H | 5.9600520  | 4.6447670  | 8.8264770  |
| C | 5.3804350  | 10.7471300 | 9.9764590  |
| H | 4.9975130  | 11.2457290 | 9.0825170  |
| H | 5.2834650  | 11.4429340 | 10.8150290 |
| H | 6.4451110  | 10.5475590 | 9.8261280  |
| C | 5.2110480  | 8.7378180  | 11.4952050 |
| H | 5.1569370  | 9.3705940  | 12.3850710 |
| H | 4.6888700  | 7.8037380  | 11.7186330 |
| H | 6.2655620  | 8.5034040  | 11.3263410 |
| C | -1.3478150 | 8.5492840  | 8.8585690  |
| H | -1.9474600 | 9.1199100  | 9.5726750  |
| H | -1.9988130 | 8.2875350  | 8.0199540  |
| H | -1.0391140 | 7.6223580  | 9.3496020  |
| C | -0.6017110 | 10.6484660 | 7.6658660  |
| H | 0.2452680  | 11.2171260 | 7.2733290  |
| H | -1.2709560 | 10.4158160 | 6.8328390  |
| H | -1.1444090 | 11.2942950 | 8.3622410  |
| C | -0.0155140 | 4.9559990  | 5.5836560  |
| H | -0.9632960 | 5.4901360  | 5.4746570  |
| H | -0.0497000 | 4.0930030  | 4.9133550  |
| H | 0.0442990  | 4.5789230  | 6.6080680  |
| C | 1.0447090  | 6.3969460  | 3.8019150  |
| H | 1.8459470  | 7.0998880  | 3.5598270  |
| H | 1.1032130  | 5.5657940  | 3.0931280  |
| H | 0.0884120  | 6.9045530  | 3.6476580  |

#### **DIPPZnH-HBcat-O-bound- B3PW91**

|   |            |            |            |
|---|------------|------------|------------|
| C | -4.5402180 | 1.7743630  | 0.3075510  |
| C | -4.3097900 | 2.7455120  | -0.6076340 |
| C | -2.5289360 | 1.3616460  | -0.6222240 |
| C | -3.3373860 | -0.2454170 | 1.1055800  |
| C | -2.4846300 | 3.2764200  | -2.2137090 |
| C | -2.7647870 | 2.9414520  | -3.5493960 |
| C | -2.2033580 | 3.7480170  | -4.5405170 |
| C | -1.4085140 | 4.8377770  | -4.2150920 |
| C | -1.1581070 | 5.1483830  | -2.8861730 |
| C | -1.6921940 | 4.3780680  | -1.8516250 |
| C | -3.9147490 | -1.4370120 | 0.6360420  |

|    |            |            |            |
|----|------------|------------|------------|
| C  | -3.8478640 | -2.5527280 | 1.4729240  |
| C  | -3.2379170 | -2.4808830 | 2.7167270  |
| C  | -2.6887310 | -1.2849590 | 3.1582420  |
| C  | -2.7343630 | -0.1338390 | 2.3695270  |
| C  | -2.2118170 | 1.1825930  | 2.9188050  |
| C  | -4.6169160 | -1.5480280 | -0.7071610 |
| C  | -3.9555540 | -2.5962260 | -1.6100580 |
| C  | -6.1108790 | -1.8468260 | -0.5224390 |
| C  | -1.4232520 | 4.7648960  | -0.4078310 |
| C  | 0.0781460  | 4.8412260  | -0.1063050 |
| C  | -2.1196860 | 6.0873230  | -0.0568310 |
| C  | -3.6583040 | 1.7775480  | -3.9422960 |
| C  | -4.9757140 | 2.2814190  | -4.5483180 |
| C  | -2.9526240 | 0.8073650  | -4.8973360 |
| C  | -3.1709430 | 1.7341350  | 3.9843230  |
| C  | -0.7897920 | 1.0675640  | 3.4783710  |
| Zn | -0.6471400 | 0.6026670  | -1.2324050 |
| C  | 1.9230910  | -2.2449400 | 1.6220010  |
| C  | 1.6631120  | -1.0209320 | 1.0199510  |
| C  | 2.5682580  | 0.0193720  | 1.0488040  |
| C  | 3.7685190  | -0.2232180 | 1.7230490  |
| C  | 4.0291200  | -1.4513480 | 2.3313220  |
| C  | 3.1027250  | -2.4961310 | 2.2918740  |
| H  | -5.3777340 | 1.6022510  | 0.9621450  |
| H  | -4.9043430 | 3.5912350  | -0.9088560 |
| H  | -2.3959690 | 3.5208480  | -5.5832720 |
| H  | -0.9843590 | 5.4513390  | -5.0027200 |
| H  | -0.5399840 | 6.0064830  | -2.6461780 |
| H  | -4.2824960 | -3.4909730 | 1.1455320  |
| H  | -3.1966740 | -3.3602840 | 3.3505180  |
| H  | -2.2325300 | -1.2397030 | 4.1409040  |
| H  | -2.1815840 | 1.9048040  | 2.0984060  |
| H  | -4.5384810 | -0.5842680 | -1.2172430 |
| H  | -4.4530760 | -2.6227970 | -2.5835200 |
| H  | -2.8981300 | -2.3740900 | -1.7768470 |
| H  | -4.0218780 | -3.5981190 | -1.1771330 |
| H  | -6.6149720 | -1.8672090 | -1.4928090 |
| H  | -6.5975290 | -1.0896080 | 0.0977730  |
| H  | -6.2641430 | -2.8193980 | -0.0458990 |
| H  | -1.8468370 | 3.9908570  | 0.2376690  |
| H  | 0.2381730  | 5.0460400  | 0.9559960  |

|   |            |            |            |
|---|------------|------------|------------|
| H | 0.5874000  | 3.9066900  | -0.3549990 |
| H | 0.5619190  | 5.6421310  | -0.6721930 |
| H | -1.9596330 | 6.3319560  | 0.9970710  |
| H | -3.1970920 | 6.0340960  | -0.2337780 |
| H | -1.7230120 | 6.9120900  | -0.6560660 |
| H | -3.9092540 | 1.2177370  | -3.0372920 |
| H | -5.6322180 | 1.4382870  | -4.7818120 |
| H | -5.5059800 | 2.9448270  | -3.8600900 |
| H | -4.7969210 | 2.8335930  | -5.4756920 |
| H | -3.5975750 | -0.0513620 | -5.1035970 |
| H | -2.0147730 | 0.4356450  | -4.4761880 |
| H | -2.7214740 | 1.2814730  | -5.8552120 |
| H | -2.8210240 | 2.7064340  | 4.3428740  |
| H | -4.1829410 | 1.8609510  | 3.5912860  |
| H | -3.2273380 | 1.0588300  | 4.8432860  |
| H | -0.7505800 | 0.4199950  | 4.3586750  |
| H | -0.4290000 | 2.0534860  | 3.7845710  |
| H | -0.0952220 | 0.6660650  | 2.7370190  |
| H | 0.6565670  | 0.5725690  | -2.1833660 |
| H | 2.3722350  | 0.9713880  | 0.5726880  |
| H | 4.5125020  | 0.5636450  | 1.7702290  |
| H | 4.9719070  | -1.6012350 | 2.8448760  |
| H | 3.2942700  | -3.4548080 | 2.7579820  |
| H | -1.1022040 | -2.7690660 | 0.3255340  |
| N | -3.4419300 | 0.9367800  | 0.2832630  |
| N | -3.0765990 | 2.4764600  | -1.1659760 |
| B | -0.0634950 | -2.3629490 | 0.7022040  |
| O | 0.4038730  | -1.0767950 | 0.4406860  |
| O | 0.8512070  | -3.0872100 | 1.4262540  |

#### **DIPPZnC6F5-M062X**

|    |           |           |           |
|----|-----------|-----------|-----------|
| Zn | 3.1859940 | 6.4178490 | 8.8187410 |
| N  | 3.1041780 | 7.2542420 | 5.8413230 |
| N  | 2.8002960 | 8.9353110 | 7.1291250 |
| C  | 2.9921970 | 7.6034360 | 7.1334170 |
| C  | 3.4136230 | 5.9118730 | 5.4190060 |
| C  | 2.3758170 | 5.1014030 | 4.9453230 |
| C  | 1.4867680 | 9.9125230 | 8.9454400 |
| C  | 2.9863300 | 8.3580360 | 5.0215230 |
| H  | 3.0526970 | 8.2837820 | 3.9490210 |
| C  | 2.7897020 | 9.4247570 | 5.8392030 |

|   |            |            |            |
|---|------------|------------|------------|
| H | 2.6610740  | 10.4724540 | 5.6251830  |
| C | 2.7366700  | 9.7123810  | 8.3439730  |
| C | 0.9387700  | 5.5824240  | 4.8500300  |
| H | 0.8914570  | 6.6137150  | 5.2076420  |
| C | 5.8735200  | 6.3892900  | 6.0022700  |
| H | 5.4554710  | 7.3511720  | 6.3099000  |
| C | 4.7440730  | 5.4860880  | 5.5305660  |
| C | 0.2005970  | 9.4439550  | 8.2880890  |
| H | 0.4409770  | 8.6144990  | 7.6164230  |
| C | 3.9432390  | 10.1759370 | 8.8818020  |
| C | 1.4722270  | 10.6170310 | 10.1483640 |
| H | 0.5301500  | 10.8013740 | 10.6497170 |
| C | 2.7101150  | 3.8016950  | 4.5650260  |
| H | 1.9374150  | 3.1392210  | 4.1921600  |
| C | 3.8713070  | 10.8706400 | 10.0901290 |
| H | 4.7810660  | 11.2445670 | 10.5454550 |
| C | 5.0212770  | 4.1753150  | 5.1404010  |
| H | 6.0376460  | 3.8042600  | 5.2042410  |
| C | 0.0156920  | 4.7414820  | 5.7400370  |
| H | 0.0008560  | 3.6979150  | 5.4165300  |
| H | -1.0057090 | 5.1238350  | 5.6862310  |
| H | 0.3357420  | 4.7664040  | 6.7845580  |
| C | 4.0172480  | 3.3437610  | 4.6624570  |
| H | 4.2560220  | 2.3302360  | 4.3632890  |
| C | 5.2859320  | 9.9503350  | 8.2070780  |
| H | 5.1140970  | 9.4928420  | 7.2300700  |
| C | 2.6512540  | 11.0875110 | 10.7147740 |
| H | 2.6165110  | 11.6304570 | 11.6515600 |
| C | -0.8330880 | 8.9368890  | 9.2971630  |
| H | -0.4122160 | 8.1776610  | 9.9602290  |
| H | -1.6790060 | 8.4979820  | 8.7648480  |
| H | -1.2229450 | 9.7499500  | 9.9130440  |
| C | 6.6132700  | 5.8018320  | 7.2103560  |
| H | 5.9626290  | 5.6840420  | 8.0817870  |
| H | 7.4331730  | 6.4619400  | 7.5016280  |
| H | 7.0405540  | 4.8237940  | 6.9776830  |
| C | 0.4549890  | 5.5721280  | 3.3950500  |
| H | 1.1012600  | 6.1809940  | 2.7594260  |
| H | -0.5607950 | 5.9681460  | 3.3348200  |
| H | 0.4435750  | 4.5556890  | 2.9939440  |
| C | 6.1618870  | 8.9936540  | 9.0247820  |

|   |            |            |            |
|---|------------|------------|------------|
| H | 6.3498090  | 9.3954820  | 10.0237950 |
| H | 7.1261810  | 8.8517450  | 8.5312550  |
| H | 5.6989690  | 8.0093390  | 9.1408460  |
| C | -0.3862340 | 10.5791280 | 7.4368730  |
| H | -0.6330080 | 11.4357100 | 8.0695750  |
| H | -1.2989560 | 10.2459450 | 6.9382560  |
| H | 0.3198740  | 10.9148280 | 6.6743610  |
| C | 6.8474320  | 6.6602420  | 4.8482310  |
| H | 7.3312500  | 5.7358190  | 4.5230360  |
| H | 7.6262020  | 7.3549480  | 5.1699930  |
| H | 6.3293200  | 7.0935190  | 3.9902000  |
| C | 6.0095530  | 11.2794990 | 7.9626960  |
| H | 5.3891520  | 11.9624050 | 7.3788880  |
| H | 6.9377840  | 11.1022840 | 7.4158380  |
| H | 6.2652300  | 11.7702600 | 8.9043330  |
| C | 3.1960280  | 5.5304110  | 10.6741910 |
| C | 2.0411470  | 5.1802520  | 11.3423630 |
| C | 4.3863650  | 5.2935550  | 11.3301240 |
| C | 2.0483420  | 4.6150920  | 12.6069240 |
| C | 4.4501730  | 4.7312710  | 12.5945100 |
| C | 3.2660010  | 4.3925400  | 13.2318430 |
| F | 0.8407250  | 5.3795820  | 10.7631380 |
| F | 0.9176730  | 4.2835860  | 13.2265910 |
| F | 3.2977520  | 3.8488490  | 14.4427800 |
| F | 5.6136110  | 4.5113380  | 13.2028820 |
| F | 5.5509150  | 5.6148170  | 10.7315950 |

### **DIPPZnC6F5-OPEt3-M062X**

|    |           |           |            |
|----|-----------|-----------|------------|
| Zn | 3.1657670 | 4.8930520 | 10.0346560 |
| N  | 4.5178250 | 7.5193610 | 8.9087050  |
| N  | 4.2933590 | 7.6291190 | 11.0303420 |
| C  | 4.0531240 | 6.8296600 | 9.9668250  |
| C  | 4.5261490 | 7.0193190 | 7.5585150  |
| C  | 3.4628830 | 7.3609380 | 6.7150390  |
| C  | 2.7187520 | 7.3348460 | 12.8830400 |
| C  | 5.0451240 | 8.7379170 | 9.2935250  |
| H  | 5.4679090 | 9.4269960 | 8.5820780  |
| C  | 4.8996100 | 8.8081310 | 10.6385420 |
| H  | 5.1806090 | 9.5707590 | 11.3454100 |
| C  | 4.0272520 | 7.2226040 | 12.3914330 |
| C  | 2.2692640 | 8.1601160 | 7.2038300  |

|   |            |            |            |
|---|------------|------------|------------|
| H | 2.5033000  | 8.5622690  | 8.1923960  |
| C | 6.7418320  | 5.8441860  | 8.0933160  |
| H | 6.5993160  | 6.3597440  | 9.0468140  |
| C | 5.6048470  | 6.2226900  | 7.1584270  |
| C | 1.6272740  | 8.0154320  | 12.0722310 |
| H | 1.7603880  | 7.7363240  | 11.0219890 |
| C | 5.0893440  | 6.6841450  | 13.1307250 |
| C | 2.4787580  | 6.8360430  | 14.1631970 |
| H | 1.4798760  | 6.8789540  | 14.5775470 |
| C | 3.5087450  | 6.8814610  | 5.4070770  |
| H | 2.7017160  | 7.1177150  | 4.7226440  |
| C | 4.7913660  | 6.1904240  | 14.4004790 |
| H | 5.5765560  | 5.7495090  | 15.0025350 |
| C | 5.6018300  | 5.7656330  | 5.8392910  |
| H | 6.4209770  | 5.1490090  | 5.4861650  |
| C | 1.0570320  | 7.2309580  | 7.3537540  |
| H | 0.7335520  | 6.8647440  | 6.3747160  |
| H | 0.2198160  | 7.7667450  | 7.8074860  |
| H | 1.3030320  | 6.3609180  | 7.9679860  |
| C | 4.5690420  | 6.0963090  | 4.9720740  |
| H | 4.5885390  | 5.7369960  | 3.9495970  |
| C | 6.5044580  | 6.6085040  | 12.5773760 |
| H | 6.6172880  | 7.3845880  | 11.8168080 |
| C | 3.5001230  | 6.2588110  | 14.9064930 |
| H | 3.2862510  | 5.8570480  | 15.8903880 |
| C | 0.2119210  | 7.6167520  | 12.4934530 |
| H | 0.0863930  | 6.5343550  | 12.5315260 |
| H | -0.5068970 | 8.0276280  | 11.7817630 |
| H | -0.0342320 | 8.0264870  | 13.4762600 |
| C | 6.7363510  | 4.3359810  | 8.3752220  |
| H | 5.8252090  | 4.0248320  | 8.8934580  |
| H | 7.5812930  | 4.0659610  | 9.0130630  |
| H | 6.8151100  | 3.7644410  | 7.4459430  |
| C | 1.9487190  | 9.3455820  | 6.2894330  |
| H | 2.8116580  | 10.0056970 | 6.1811760  |
| H | 1.1233410  | 9.9242420  | 6.7094800  |
| H | 1.6460790  | 9.0117900  | 5.2941930  |
| C | 6.7511130  | 5.2567680  | 11.8997550 |
| H | 6.6674250  | 4.4446310  | 12.6276290 |
| H | 7.7546930  | 5.2257510  | 11.4666960 |
| H | 6.0298250  | 5.0689510  | 11.1016690 |

|   |           |            |            |
|---|-----------|------------|------------|
| C | 1.7796100 | 9.5417910  | 12.1734330 |
| H | 1.6731930 | 9.8557360  | 13.2151800 |
| H | 1.0034570 | 10.0375370 | 11.5858610 |
| H | 2.7505660 | 9.8835600  | 11.8126040 |
| C | 8.0960480 | 6.2887360  | 7.5291880  |
| H | 8.3378680 | 5.7518900  | 6.6087230  |
| H | 8.8868600 | 6.0827460  | 8.2537690  |
| H | 8.0983430 | 7.3583260  | 7.3100730  |
| C | 7.5674940 | 6.8706260  | 13.6485400 |
| H | 7.3623370 | 7.7907410  | 14.1990820 |
| H | 8.5471630 | 6.9628110  | 13.1754040 |
| H | 7.6275000 | 6.0475650  | 14.3640180 |
| C | 3.3558010 | 3.6467760  | 11.7145190 |
| C | 2.4459490 | 3.8052240  | 12.7369610 |
| C | 4.4550590 | 2.8727010  | 12.0204750 |
| C | 2.6028970 | 3.2705620  | 14.0046180 |
| C | 4.6716330 | 2.3105920  | 13.2685130 |
| C | 3.7358960 | 2.5201760  | 14.2698810 |
| F | 1.3304260 | 4.5390650  | 12.5207390 |
| F | 1.7144060 | 3.4968460  | 14.9737590 |
| F | 3.9312250 | 2.0078010  | 15.4825390 |
| F | 5.7710940 | 1.6003850  | 13.5298000 |
| F | 5.4104310 | 2.6508500  | 11.0878350 |
| P | 2.5076010 | 2.7249520  | 7.6579350  |
| C | 3.6063960 | 1.5666560  | 8.5289020  |
| H | 4.4001280 | 2.1764900  | 8.9691550  |
| H | 3.0306300 | 1.1582740  | 9.3656690  |
| C | 0.8247270 | 2.0594680  | 7.6466000  |
| H | 0.5170050 | 1.9872480  | 8.6933460  |
| H | 0.2011350 | 2.8292390  | 7.1835440  |
| C | 3.0608220 | 2.9014240  | 5.9458370  |
| H | 4.0317520 | 3.4061740  | 6.0008500  |
| H | 3.2226580 | 1.9119680  | 5.5108060  |
| O | 2.4983470 | 4.1046960  | 8.3364560  |
| C | 2.0616230 | 3.7168270  | 5.1204380  |
| H | 1.8229060 | 4.6580740  | 5.6192960  |
| H | 2.4860340 | 3.9514910  | 4.1438510  |
| H | 1.1363510 | 3.1599610  | 4.9591210  |
| C | 4.2175180 | 0.4562350  | 7.6680540  |
| H | 4.8937690 | 0.8708340  | 6.9192060  |
| H | 4.7950870 | -0.2169470 | 8.3016210  |

|   |            |            |           |
|---|------------|------------|-----------|
| H | 3.4608560  | -0.1364640 | 7.1529510 |
| C | 0.6738760  | 0.7156130  | 6.9302360 |
| H | 1.2084590  | -0.0784650 | 7.4532770 |
| H | -0.3785860 | 0.4344120  | 6.8929590 |
| H | 1.0417410  | 0.7622870  | 5.9027520 |

**BCF-OPEt3-M062X**

|   |            |            |            |
|---|------------|------------|------------|
| B | -5.6365840 | -1.0623280 | -0.0417410 |
| C | -5.8536680 | -2.1717440 | -1.1257530 |
| C | -5.3651100 | 0.4157360  | -0.4816730 |
| C | -5.4173240 | -3.4840710 | -0.9435520 |
| C | -5.5964730 | -4.4734450 | -1.8924580 |
| C | -6.2523370 | -4.1672630 | -3.0737530 |
| C | -6.7120470 | -2.8796960 | -3.2966670 |
| C | -6.5000780 | -1.9103690 | -2.3340220 |
| C | -4.6484600 | 0.7255080  | -1.6382310 |
| C | -4.3987120 | 2.0238580  | -2.0410870 |
| C | -4.8902700 | 3.0739490  | -1.2830320 |
| C | -5.6146420 | 2.8166570  | -0.1304670 |
| C | -5.8317180 | 1.5063280  | 0.2524010  |
| C | -6.5459330 | -2.4302000 | 1.9620800  |
| C | -5.6971070 | -1.4340690 | 1.4778360  |
| C | -4.9106110 | -0.7912650 | 2.4340680  |
| C | -4.9506580 | -1.1123240 | 3.7780620  |
| C | -5.8166070 | -2.1030400 | 4.2118170  |
| C | -6.6237740 | -2.7645260 | 3.3008840  |
| F | -7.3432990 | -2.5896410 | -4.4286410 |
| F | -6.4391170 | -5.1036100 | -3.9884040 |
| F | -5.1539050 | -5.7077120 | -1.6820100 |
| F | -4.7819230 | -3.8350240 | 0.1749470  |
| F | -6.9636120 | -0.6892270 | -2.6023660 |
| F | -3.7017040 | 2.2736130  | -3.1434760 |
| F | -4.6690030 | 4.3217020  | -1.6598840 |
| F | -6.0893750 | 3.8255600  | 0.5906680  |
| F | -6.5385510 | 1.3173710  | 1.3668410  |
| F | -4.1522260 | -0.2456950 | -2.4051770 |
| F | -7.3469550 | -3.0976420 | 1.1311190  |
| F | -7.4572750 | -3.7094420 | 3.7203460  |
| F | -5.8744370 | -2.4164370 | 5.4947680  |
| F | -4.1744410 | -0.4827090 | 4.6524180  |
| F | -4.0579840 | 0.1678500  | 2.0730220  |



**BCF-OPEt3-M062X**

|   |            |            |            |
|---|------------|------------|------------|
| B | 0.0903120  | 0.1810700  | 0.1783730  |
| C | 1.6419400  | 0.6420570  | -0.0664620 |
| C | 2.1470410  | 1.9291130  | 0.0371520  |
| C | 2.5996670  | -0.3368190 | -0.2946120 |
| C | 3.4965890  | 2.2289140  | -0.1007740 |
| C | 3.9514820  | -0.0900490 | -0.4324220 |
| C | 4.4050520  | 1.2152150  | -0.3369070 |
| C | -0.9757920 | 1.4168080  | 0.2258240  |
| C | -1.0439350 | 2.2633840  | -0.8743440 |
| C | -1.9186290 | 1.6589060  | 1.2107300  |
| C | -1.9435840 | 3.3042390  | -0.9922750 |
| C | -2.8451210 | 2.6914840  | 1.1326580  |
| C | -2.8555710 | 3.5207530  | 0.0284690  |
| C | -0.5009590 | -0.8115030 | -0.9954580 |
| C | 0.0332600  | -1.0239140 | -2.2595610 |
| C | -1.7168320 | -1.4430610 | -0.7710920 |
| C | -0.5651920 | -1.8438720 | -3.2069100 |
| C | -2.3453220 | -2.2762990 | -1.6774590 |
| C | -1.7569580 | -2.4811030 | -2.9138540 |
| F | 1.3486830  | 2.9750010  | 0.2913250  |
| F | 3.9237940  | 3.4867960  | 0.0055170  |
| F | 5.7004480  | 1.4874970  | -0.4616440 |
| F | 4.8143800  | -1.0859620 | -0.6337110 |
| F | 2.2197780  | -1.6282450 | -0.3732480 |
| F | -2.3398670 | -1.2707410 | 0.4132970  |
| F | -3.4920420 | -2.8814250 | -1.3702080 |
| F | -2.3351690 | -3.2740490 | -3.8092480 |
| F | -0.0005000 | -2.0234170 | -4.3993120 |
| F | 1.1762190  | -0.4415420 | -2.6386100 |
| F | -0.1856410 | 2.0807130  | -1.8909810 |
| F | -2.0027820 | 0.8907430  | 2.3089830  |
| F | -3.7300200 | 2.8825740  | 2.1124340  |
| F | -3.7374160 | 4.5131780  | -0.0598260 |
| F | -1.9499640 | 4.0938730  | -2.0659140 |
| P | 0.0533960  | -1.8606990 | 2.2938930  |
| O | 0.1278300  | -0.5103520 | 1.5328760  |
| C | 0.0895600  | -3.3174910 | 1.1938600  |

|   |            |            |           |
|---|------------|------------|-----------|
| H | 0.9274090  | -3.9308950 | 1.5372530 |
| H | 0.3616670  | -2.9516470 | 0.2030040 |
| C | 1.4911980  | -1.9496430 | 3.3861440 |
| H | 1.3726410  | -1.1619440 | 4.1333040 |
| H | 1.4155430  | -2.9093880 | 3.9082940 |
| C | -1.4190590 | -1.8987480 | 3.3463050 |
| H | -1.5572920 | -2.9328700 | 3.6732490 |
| H | -2.2618940 | -1.6365310 | 2.7056810 |
| C | 2.8304520  | -1.7982760 | 2.6641550 |
| H | 2.9446850  | -2.5112520 | 1.8456910 |
| H | 2.9270590  | -0.7895300 | 2.2612250 |
| H | 3.6442440  | -1.9591970 | 3.3709760 |
| C | -1.3201940 | -0.9537200 | 4.5489540 |
| H | -2.2997620 | -0.8633930 | 5.0183930 |
| H | -0.6240230 | -1.3354430 | 5.2962230 |
| H | -1.0024550 | 0.0436400  | 4.2449810 |
| C | -1.1925790 | -4.1576700 | 1.1472750 |
| H | -2.0714290 | -3.5662050 | 0.8905220 |
| H | -1.0777890 | -4.9342660 | 0.3903690 |
| H | -1.3819330 | -4.6503080 | 2.1015020 |

**HBCF-M062X**

|   |            |            |            |
|---|------------|------------|------------|
| B | -0.0656590 | 0.0904780  | -0.8694220 |
| C | -0.2104440 | 1.5908570  | -0.2361220 |
| C | 1.4045710  | -0.5660150 | -0.5813760 |
| C | -0.9859890 | 2.5462510  | -0.8791980 |
| C | -1.1417000 | 3.8455150  | -0.4195030 |
| C | -0.5018730 | 4.2348850  | 0.7423310  |
| C | 0.2749200  | 3.3167690  | 1.4261950  |
| C | 0.3992540  | 2.0283380  | 0.9316130  |
| C | 2.4517340  | -0.3500630 | -1.4668670 |
| C | 3.7159190  | -0.8997380 | -1.3109700 |
| C | 3.9735250  | -1.7073920 | -0.2192750 |
| C | 2.9665410  | -1.9427540 | 0.7001080  |
| C | 1.7196390  | -1.3704040 | 0.5058620  |
| C | -1.9243820 | -0.8427540 | 0.8351400  |
| C | -1.2726520 | -0.9031910 | -0.3889220 |
| C | -1.7232170 | -1.9056490 | -1.2379720 |
| C | -2.7523910 | -2.7782740 | -0.9188480 |
| C | -3.3781420 | -2.6675760 | 0.3090900  |
| C | -2.9586860 | -1.6918310 | 1.1955510  |

|   |            |            |            |
|---|------------|------------|------------|
| F | 0.8829230  | 3.6810080  | 2.5597570  |
| F | -0.6388020 | 5.4796490  | 1.2030640  |
| F | -1.9014230 | 4.7241460  | -1.0817360 |
| F | -1.6447880 | 2.2411240  | -2.0085610 |
| F | 1.1386830  | 1.1857780  | 1.6693240  |
| F | 4.6848470  | -0.6602650 | -2.2005710 |
| F | 5.1811300  | -2.2484220 | -0.0484940 |
| F | 3.2134810  | -2.7096500 | 1.7669960  |
| F | 0.8065670  | -1.6165860 | 1.4579410  |
| F | 2.2815260  | 0.4307150  | -2.5454490 |
| F | -1.5549510 | 0.0552600  | 1.7617290  |
| F | -3.5491060 | -1.5897910 | 2.3907420  |
| F | -4.3680650 | -3.4992560 | 0.6388970  |
| F | -3.1444080 | -3.7243630 | -1.7784690 |
| F | -1.1544470 | -2.0827740 | -2.4411470 |
| H | -0.1662240 | 0.2064040  | -2.0610270 |

#### **DIPPZnC6F5H-M062X**

|    |            |            |            |
|----|------------|------------|------------|
| Zn | 0.4698520  | -0.2571400 | -1.7003720 |
| N  | 2.3003200  | -0.1744860 | 0.9313380  |
| N  | 0.3575350  | 0.5186100  | 1.4628480  |
| C  | 1.0816070  | 0.0782240  | 0.4065440  |
| C  | 3.4544730  | -0.4879400 | 0.1326270  |
| C  | 4.1846180  | 0.5868120  | -0.3899690 |
| C  | -1.2603170 | 2.2064380  | 0.7483980  |
| C  | 2.3452570  | 0.0922580  | 2.2877640  |
| H  | 3.2411290  | -0.0440420 | 2.8693610  |
| C  | 1.1106370  | 0.5298580  | 2.6254120  |
| H  | 0.7055980  | 0.8588520  | 3.5673840  |
| C  | -1.0076670 | 0.9751890  | 1.3794070  |
| C  | 3.7822940  | 2.0337410  | -0.1563530 |
| H  | 2.9336530  | 2.0545730  | 0.5317990  |
| C  | 2.9464720  | -2.9703490 | 0.4412930  |
| H  | 2.1641230  | -2.5528240 | 1.0791820  |
| C  | 3.7821060  | -1.8259200 | -0.0999380 |
| C  | -0.1326180 | 3.0683620  | 0.1921270  |
| H  | 0.5612830  | 2.4104500  | -0.3396420 |
| C  | -2.0131170 | 0.1799260  | 1.9412260  |
| C  | -2.5885920 | 2.6213240  | 0.6780790  |
| H  | -2.8342720 | 3.5510530  | 0.1820280  |
| C  | 5.2941030  | 0.2811640  | -1.1767810 |

|   |            |            |            |
|---|------------|------------|------------|
| H | 5.8802930  | 1.0842410  | -1.6092070 |
| C | -3.3264640 | 0.6440360  | 1.8399000  |
| H | -4.1340220 | 0.0565250  | 2.2620870  |
| C | 4.9011860  | -2.0802250 | -0.8939910 |
| H | 5.1833690  | -3.1059140 | -1.1043690 |
| C | 3.3239620  | 2.6834290  | -1.4675310 |
| H | 4.1508530  | 2.7447030  | -2.1805170 |
| H | 2.9620940  | 3.6982020  | -1.2794290 |
| H | 2.5238350  | 2.1039970  | -1.9342670 |
| C | 5.6492300  | -1.0387750 | -1.4252610 |
| H | 6.5124780  | -1.2574120 | -2.0427310 |
| C | -1.7189770 | -1.0936240 | 2.7197390  |
| H | -0.6721290 | -1.3643980 | 2.5649220  |
| C | -3.6112950 | 1.8484400  | 1.2158180  |
| H | -4.6380940 | 2.1859860  | 1.1366880  |
| C | -0.6030400 | 4.1314120  | -0.8016880 |
| H | -1.2173040 | 3.7025100  | -1.5932230 |
| H | 0.2683620  | 4.6052060  | -1.2587850 |
| H | -1.1761650 | 4.9164070  | -0.3006280 |
| C | 2.2631270  | -3.7180870 | -0.7101430 |
| H | 1.6858470  | -3.0343530 | -1.3370170 |
| H | 1.5871050  | -4.4827510 | -0.3211870 |
| H | 3.0041970  | -4.2076270 | -1.3476900 |
| C | 4.9145220  | 2.8362120  | 0.4924950  |
| H | 5.2297440  | 2.3824120  | 1.4347930  |
| H | 4.5799750  | 3.8563020  | 0.6962300  |
| H | 5.7852780  | 2.8949880  | -0.1654200 |
| C | -2.5650970 | -2.2901630 | 2.2733810  |
| H | -3.6351830 | -2.0722280 | 2.3117260  |
| H | -2.3761800 | -3.1357000 | 2.9391680  |
| H | -2.3145090 | -2.6016800 | 1.2609300  |
| C | 0.6457610  | 3.7496800  | 1.3294800  |
| H | -0.0128310 | 4.4323690  | 1.8736850  |
| H | 1.4751820  | 4.3318150  | 0.9176740  |
| H | 1.0577770  | 3.0344460  | 2.0426460  |
| C | 3.7860060  | -3.9254470 | 1.2960490  |
| H | 4.5658940  | -4.4054540 | 0.6995060  |
| H | 3.1516020  | -4.7114330 | 1.7117730  |
| H | 4.2670230  | -3.3967790 | 2.1218780  |
| C | -1.9272640 | -0.8282340 | 4.2187750  |
| H | -1.3420220 | 0.0272090  | 4.5632520  |

|   |            |            |            |
|---|------------|------------|------------|
| H | -1.6387330 | -1.7042060 | 4.8040580  |
| H | -2.9799410 | -0.6136980 | 4.4228910  |
| C | -1.6453580 | -0.6076340 | -1.6004980 |
| C | -2.5214170 | 0.4352750  | -1.8085640 |
| C | -2.2361370 | -1.7789080 | -1.1857280 |
| C | -3.8880870 | 0.3593950  | -1.5993790 |
| C | -3.5971980 | -1.9279770 | -0.9662500 |
| C | -4.4280990 | -0.8391590 | -1.1656740 |
| F | -2.0466200 | 1.6374890  | -2.2182460 |
| F | -4.6835260 | 1.4223740  | -1.7603170 |
| F | -5.7367530 | -0.9376590 | -0.9210250 |
| F | -4.1146300 | -3.0816330 | -0.5277650 |
| F | -1.4715430 | -2.8708770 | -0.9319000 |
| H | 1.5362700  | -0.1179610 | -2.9899030 |

#### **DIPPZnC6F5-B3LYPD3BJ**

|    |           |            |            |
|----|-----------|------------|------------|
| Zn | 3.1921010 | 6.4395430  | 8.7895690  |
| N  | 3.1383460 | 7.2587190  | 5.8215840  |
| N  | 2.8406350 | 8.9455340  | 7.1169970  |
| C  | 3.0222500 | 7.6083030  | 7.1183170  |
| C  | 3.4277460 | 5.9087320  | 5.4044530  |
| C  | 2.3714200 | 5.1023000  | 4.9589350  |
| C  | 1.4875040 | 9.9006650  | 8.9172290  |
| C  | 3.0296340 | 8.3711890  | 5.0019120  |
| H  | 3.0989510 | 8.3003460  | 3.9310440  |
| C  | 2.8373080 | 9.4386540  | 5.8220680  |
| H  | 2.7103360 | 10.4851770 | 5.6093640  |
| C  | 2.7506850 | 9.7138060  | 8.3366520  |
| C  | 0.9414350 | 5.6095750  | 4.8711620  |
| H  | 0.9219630 | 6.6420810  | 5.2238330  |
| C  | 5.8975130 | 6.3640150  | 5.9503080  |
| H  | 5.4846440 | 7.3342500  | 6.2292840  |
| C  | 4.7550840 | 5.4640260  | 5.5030930  |
| C  | 0.2163610 | 9.4050280  | 8.2476990  |
| H  | 0.4972100 | 8.6600720  | 7.5000200  |
| C  | 3.9440410 | 10.1840280 | 8.9039130  |
| C  | 1.4418040 | 10.6049870 | 10.1222620 |
| H  | 0.4881220 | 10.7796360 | 10.6034000 |
| C  | 2.6818670 | 3.7892230  | 4.5978960  |
| H  | 1.8953760 | 3.1321850  | 4.2482560  |
| C  | 3.8419790 | 10.8763580 | 10.1132060 |

|   |            |            |            |
|---|------------|------------|------------|
| H | 4.7384690  | 11.2538040 | 10.5888530 |
| C | 5.0089420  | 4.1402180  | 5.1343290  |
| H | 6.0196420  | 3.7561030  | 5.1926740  |
| C | 0.0011500  | 4.8001590  | 5.7785030  |
| H | -0.0470360 | 3.7530280  | 5.4702030  |
| H | -1.0108460 | 5.2095480  | 5.7323030  |
| H | 0.3305660  | 4.8275690  | 6.8203930  |
| C | 3.9850830  | 3.3131910  | 4.6867770  |
| H | 4.2045180  | 2.2905220  | 4.4040790  |
| C | 5.3014720  | 9.9568610  | 8.2572650  |
| H | 5.1441950  | 9.4850110  | 7.2861870  |
| C | 2.6057770  | 11.0853470 | 10.7132020 |
| H | 2.5479430  | 11.6271040 | 11.6496900 |
| C | -0.7443030 | 8.7216980  | 9.2309250  |
| H | -0.2538680 | 7.9135430  | 9.7785620  |
| H | -1.5913140 | 8.2988230  | 8.6856120  |
| H | -1.1458880 | 9.4272230  | 9.9618170  |
| C | 6.6302800  | 5.8047700  | 7.1804720  |
| H | 5.9728770  | 5.7059370  | 8.0478930  |
| H | 7.4465240  | 6.4723850  | 7.4648200  |
| H | 7.0599530  | 4.8215200  | 6.9755070  |
| C | 0.4466520  | 5.6141680  | 3.4155430  |
| H | 1.1037820  | 6.2105080  | 2.7782420  |
| H | -0.5599360 | 6.0356890  | 3.3603240  |
| H | 0.4096280  | 4.6011920  | 3.0070360  |
| C | 6.1644650  | 9.0015270  | 9.0965750  |
| H | 6.3427580  | 9.4038790  | 10.0967270 |
| H | 7.1335090  | 8.8470960  | 8.6164550  |
| H | 5.6920350  | 8.0234600  | 9.2080890  |
| C | -0.4776670 | 10.5631410 | 7.5087200  |
| H | -0.7868230 | 11.3388600 | 8.2141290  |
| H | -1.3670800 | 10.2025900 | 6.9861020  |
| H | 0.1882740  | 11.0225900 | 6.7746550  |
| C | 6.8758750  | 6.6085300  | 4.7888830  |
| H | 7.3571580  | 5.6786210  | 4.4760030  |
| H | 7.6582040  | 7.3067670  | 5.0962230  |
| H | 6.3594450  | 7.0299090  | 3.9234300  |
| C | 6.0284090  | 11.2856700 | 7.9991380  |
| H | 5.4161900  | 11.9564900 | 7.3920810  |
| H | 6.9662480  | 11.1027820 | 7.4692580  |
| H | 6.2678010  | 11.7985690 | 8.9335560  |

|   |           |           |            |
|---|-----------|-----------|------------|
| C | 3.1969790 | 5.5622800 | 10.6372190 |
| C | 2.0303210 | 5.2443140 | 11.3029200 |
| C | 4.3832340 | 5.3315530 | 11.3051190 |
| C | 2.0200700 | 4.7160740 | 12.5863320 |
| C | 4.4310320 | 4.8053450 | 12.5885620 |
| C | 3.2344590 | 4.4987050 | 13.2280710 |
| F | 0.8315300 | 5.4431350 | 10.6953860 |
| F | 0.8743450 | 4.4142310 | 13.2120490 |
| F | 3.2518130 | 3.9908590 | 14.4641360 |
| F | 5.5940360 | 4.5911350 | 13.2183320 |
| F | 5.5616830 | 5.6286980 | 10.6981410 |

### **DIPPZnC6F5-OPEt3-B3LYPD3BJ**

|    |           |           |            |
|----|-----------|-----------|------------|
| Zn | 3.3042030 | 4.9339630 | 9.9203080  |
| N  | 4.5934700 | 7.5202440 | 8.7084870  |
| N  | 4.3739190 | 7.6915880 | 10.8342610 |
| C  | 4.1555330 | 6.8512350 | 9.7958230  |
| C  | 4.5538550 | 6.9720850 | 7.3762090  |
| C  | 3.4360390 | 7.2443320 | 6.5769200  |
| C  | 2.7155820 | 7.4144230 | 12.6080520 |
| C  | 5.0840880 | 8.7716820 | 9.0546650  |
| H  | 5.4820960 | 9.4510150 | 8.3221290  |
| C  | 4.9405150 | 8.8813980 | 10.4002770 |
| H  | 5.1929950 | 9.6771250 | 11.0783310 |
| C  | 4.0539140 | 7.3247160 | 12.1941000 |
| C  | 2.2606780 | 8.0644890 | 7.0807050  |
| H  | 2.5132740 | 8.4509440 | 8.0692990  |
| C  | 6.8167180 | 5.8693060 | 7.8495050  |
| H  | 6.6973150 | 6.4253890 | 8.7805300  |
| C  | 5.6220860 | 6.1683450 | 6.9577800  |
| C  | 1.6583390 | 8.0558980 | 11.7189980 |
| H  | 1.9172320 | 7.8380920 | 10.6793350 |
| C  | 5.0852160 | 6.8310070 | 13.0059490 |
| C  | 2.4131780 | 6.9387610 | 13.8850600 |
| H  | 1.3929660 | 6.9702790 | 14.2416340 |
| C  | 3.4156630 | 6.6896420 | 5.2959830  |
| H  | 2.5698380 | 6.8781240 | 4.6466200  |
| C  | 4.7246780 | 6.3523100 | 14.2670640 |
| H  | 5.4827570 | 5.9387380 | 14.9190530 |
| C  | 5.5478030 | 5.6254880 | 5.6722620  |
| H  | 6.3529190 | 4.9971650 | 5.3117410  |

|   |            |            |            |
|---|------------|------------|------------|
| C | 1.0129140  | 7.1788970  | 7.2407050  |
| H | 0.6624390  | 6.8194380  | 6.2692050  |
| H | 0.2008690  | 7.7490050  | 7.6995330  |
| H | 1.2271640  | 6.3045540  | 7.8581380  |
| C | 4.4588950  | 5.8870430  | 4.8488990  |
| H | 4.4214110  | 5.4604540  | 3.8534310  |
| C | 6.5318480  | 6.7953250  | 12.5322580 |
| H | 6.6447140  | 7.5450330  | 11.7468470 |
| C | 3.4033060  | 6.3957620  | 14.6958110 |
| H | 3.1417800  | 6.0048580  | 15.6718750 |
| C | 0.2412510  | 7.5209510  | 11.9527970 |
| H | 0.2056780  | 6.4336120  | 11.8854710 |
| H | -0.4339730 | 7.9383620  | 11.2020310 |
| H | -0.1436840 | 7.8137480  | 12.9328480 |
| C | 6.8766260  | 4.3775940  | 8.2150080  |
| H | 5.9827310  | 4.0635890  | 8.7560760  |
| H | 7.7361400  | 4.1794620  | 8.8594520  |
| H | 6.9719030  | 3.7537890  | 7.3222560  |
| C | 1.9797200  | 9.2746950  | 6.1781390  |
| H | 2.8631700  | 9.9109780  | 6.0873770  |
| H | 1.1665550  | 9.8745630  | 6.5944000  |
| H | 1.6834260  | 8.9631230  | 5.1733000  |
| C | 6.8839370  | 5.4350500  | 11.9134420 |
| H | 6.7999680  | 4.6367740  | 12.6544570 |
| H | 7.9110060  | 5.4435460  | 11.5393260 |
| H | 6.2258640  | 5.1892650  | 11.0810200 |
| C | 1.6894930  | 9.5868600  | 11.8875660 |
| H | 1.4466550  | 9.8605240  | 12.9177920 |
| H | 0.9564460  | 10.0566390 | 11.2266620 |
| H | 2.6718450  | 9.9992130  | 11.6510000 |
| C | 8.1299920  | 6.3397050  | 7.2051580  |
| H | 8.3438390  | 5.7915440  | 6.2840300  |
| H | 8.9645150  | 6.1770830  | 7.8917960  |
| H | 8.0888880  | 7.4040670  | 6.9620060  |
| C | 7.5218950  | 7.1625190  | 13.6461770 |
| H | 7.2605120  | 8.1142560  | 14.1144120 |
| H | 8.5285710  | 7.2499100  | 13.2306250 |
| H | 7.5557180  | 6.3975690  | 14.4254680 |
| C | 3.4753750  | 3.6827620  | 11.5724050 |
| C | 2.5316290  | 3.7669930  | 12.5724360 |
| C | 4.6071070  | 2.9575600  | 11.8798140 |



|   |            |            |            |
|---|------------|------------|------------|
| C | 2.6981860  | 3.2283960  | 13.8385680 |
| C | 4.8352380  | 2.3905930  | 13.1256080 |
| C | 3.8714650  | 2.5393790  | 14.1158460 |
| F | 1.3647320  | 4.4256680  | 12.3286030 |
| F | 1.7718790  | 3.3820380  | 14.7991630 |
| F | 4.0735320  | 2.0191410  | 15.3337550 |
| F | 5.9726640  | 1.7287130  | 13.3986070 |
| F | 5.5828700  | 2.7928900  | 10.9428950 |
| P | 2.4655090  | 2.7073290  | 7.6883250  |
| C | 3.6783140  | 1.5854130  | 8.4649780  |
| H | 4.5694790  | 2.1929560  | 8.6369020  |
| H | 3.2781660  | 1.3443640  | 9.4536130  |
| C | 0.7827200  | 2.1245560  | 8.0645390  |
| H | 0.6872340  | 2.1874310  | 9.1525650  |
| H | 0.1099780  | 2.8780890  | 7.6465220  |
| C | 2.7066210  | 2.6958350  | 5.8892860  |
| H | 3.7129480  | 3.0914490  | 5.7239080  |
| H | 2.7003530  | 1.6608760  | 5.5394390  |
| O | 2.6286120  | 4.1453980  | 8.2188280  |
| C | 1.6608550  | 3.5385080  | 5.1507680  |
| H | 1.6217190  | 4.5503130  | 5.5531050  |
| H | 1.9184880  | 3.6062480  | 4.0927020  |
| H | 0.6660230  | 3.0949620  | 5.2245300  |
| C | 4.0442330  | 0.3170220  | 7.6850820  |
| H | 4.5276060  | 0.5590340  | 6.7373510  |
| H | 4.7456740  | -0.2781820 | 8.2721130  |
| H | 3.1756900  | -0.3075730 | 7.4746020  |
| C | 0.4231440  | 0.7235580  | 7.5601570  |
| H | 1.0277910  | -0.0452560 | 8.0426300  |
| H | -0.6226960 | 0.5093430  | 7.7858790  |
| H | 0.5527080  | 0.6349320  | 6.4798000  |

### **BCF-B3LYPD3BJ**

|   |            |            |            |
|---|------------|------------|------------|
| B | 0.0000470  | 0.0009610  | -0.0004540 |
| C | 1.4871220  | 0.4740940  | 0.0006390  |
| C | -1.1537310 | 1.0518300  | -0.0008550 |
| C | 2.4752910  | -0.1885500 | 0.7343760  |
| C | 3.7977720  | 0.2227860  | 0.7534870  |
| C | 4.1760690  | 1.3272750  | 0.0004800  |
| C | 3.2300470  | 2.0116590  | -0.7524440 |
| C | 1.9122870  | 1.5854760  | -0.7328350 |

|   |            |            |            |
|---|------------|------------|------------|
| C | -1.0717860 | 2.2429790  | 0.7262120  |
| C | -2.0906880 | 3.1810420  | 0.7464560  |
| C | -3.2401300 | 2.9509160  | 0.0008670  |
| C | -3.3621060 | 1.7855250  | -0.7455240 |
| C | -2.3324700 | 0.8592350  | -0.7273180 |
| C | 0.4218760  | -2.4476330 | -0.7285820 |
| C | -0.3331670 | -1.5238110 | -0.0002770 |
| C | -1.4050550 | -2.0486760 | 0.7274700  |
| C | -1.7086690 | -3.3999500 | 0.7462630  |
| C | -0.9357650 | -4.2797690 | -0.0012060 |
| C | 0.1338250  | -3.8023420 | -0.7482360 |
| F | 3.5997330  | 3.0684950  | -1.4822540 |
| F | 5.4445700  | 1.7296760  | 0.0003920  |
| F | 4.7092510  | -0.4276490 | 1.4830840  |
| F | 2.1588210  | -1.2556760 | 1.4851400  |
| F | 1.0382030  | 2.2752250  | -1.4830230 |
| F | -1.9809450 | 4.2994230  | 1.4698580  |
| F | -4.2243520 | 3.8466580  | 0.0017490  |
| F | -4.4661270 | 1.5717500  | -1.4677440 |
| F | -2.4956340 | -0.2464140 | -1.4711880 |
| F | 0.0142870  | 2.5083710  | 1.4694980  |
| F | 1.4599120  | -2.0351780 | -1.4735630 |
| F | 0.8695250  | -4.6509010 | -1.4726940 |
| F | -1.2199460 | -5.5798820 | -0.0016210 |
| F | -2.7312830 | -3.8645780 | 1.4705390  |
| F | -2.1765210 | -1.2412440 | 1.4727600  |

### **BCF-OPe3-B3LYPD3BJ**

|   |            |            |            |
|---|------------|------------|------------|
| B | 0.0745300  | 0.1698690  | 0.1462630  |
| C | 1.6049280  | 0.6480300  | -0.1877460 |
| C | 2.0858350  | 1.9472910  | -0.0609500 |
| C | 2.5765270  | -0.2946710 | -0.5077670 |
| C | 3.4165260  | 2.2941590  | -0.2747410 |
| C | 3.9113120  | -0.0002350 | -0.7249540 |
| C | 4.3369010  | 1.3154500  | -0.6119370 |
| C | -1.0058810 | 1.3970020  | 0.2214690  |
| C | -1.1917960 | 2.1851860  | -0.9123100 |
| C | -1.8513540 | 1.6957920  | 1.2819740  |
| C | -2.1194030 | 3.2088600  | -1.0020180 |
| C | -2.7989720 | 2.7144340  | 1.2358360  |
| C | -2.9347880 | 3.4776430  | 0.0889650  |

|   |            |            |            |
|---|------------|------------|------------|
| C | -0.5822750 | -0.8737450 | -0.9469630 |
| C | -0.1547630 | -1.0770370 | -2.2569650 |
| C | -1.7569420 | -1.5438000 | -0.6181320 |
| C | -0.8061950 | -1.9216750 | -3.1492390 |
| C | -2.4338080 | -2.4033130 | -1.4680720 |
| C | -1.9493660 | -2.5978780 | -2.7525700 |
| F | 1.2741800  | 2.9642570  | 0.2960710  |
| F | 3.8182600  | 3.5677930  | -0.1466690 |
| F | 5.6217430  | 1.6309360  | -0.8124910 |
| F | 4.7934050  | -0.9692250 | -1.0143480 |
| F | 2.2409120  | -1.6068910 | -0.5911640 |
| F | -2.2990210 | -1.3845220 | 0.6165250  |
| F | -3.5352630 | -3.0500890 | -1.0570690 |
| F | -2.5792450 | -3.4215920 | -3.5972500 |
| F | -0.3384300 | -2.0877180 | -4.3947850 |
| F | 0.9325390  | -0.4503670 | -2.7440440 |
| F | -0.4202100 | 1.9699600  | -2.0016220 |
| F | -1.8114900 | 1.0026810  | 2.4410310  |
| F | -3.5876040 | 2.9587830  | 2.2952460  |
| F | -3.8423500 | 4.4611130  | 0.0307190  |
| F | -2.2386050 | 3.9390340  | -2.1216690 |
| P | 0.3130960  | -1.7916640 | 2.3461790  |
| O | 0.1991320  | -0.4785520 | 1.5278220  |
| C | 0.3844230  | -3.2960010 | 1.3000310  |
| H | 1.2769010  | -3.8407270 | 1.6181230  |
| H | 0.5813050  | -2.9475700 | 0.2873040  |
| C | 1.8367230  | -1.7303490 | 3.3326710  |
| H | 1.7189210  | -0.9099190 | 4.0435130  |
| H | 1.8469560  | -2.6591010 | 3.9128930  |
| C | -1.0717330 | -1.9135930 | 3.5187020  |
| H | -1.0905570 | -2.9450730 | 3.8801010  |
| H | -1.9769610 | -1.7561210 | 2.9319080  |
| C | 3.1275510  | -1.5553310 | 2.5286370  |
| H | 3.2332590  | -2.3036010 | 1.7418500  |
| H | 3.1601050  | -0.5687410 | 2.0680280  |
| H | 3.9864670  | -1.6442640 | 3.1952750  |
| C | -0.9941270 | -0.9285120 | 4.6919850  |
| H | -1.9259690 | -0.9708050 | 5.2581730  |
| H | -0.1802480 | -1.1796050 | 5.3734270  |
| H | -0.8605010 | 0.0952290  | 4.3455730  |
| C | -0.8396830 | -4.2198280 | 1.3391840  |

|   |            |            |           |
|---|------------|------------|-----------|
| H | -1.7593170 | -3.7005210 | 1.0749690 |
| H | -0.6950900 | -5.0293650 | 0.6219260 |
| H | -0.9746540 | -4.6704360 | 2.3234990 |

**DIPPZnC6F5H-B3LYPD3BJ**

|    |            |            |            |
|----|------------|------------|------------|
| Zn | 0.4244560  | -0.1218690 | -1.6485680 |
| N  | 2.3299400  | 0.0301580  | 0.9098820  |
| N  | 0.3982640  | 0.7081870  | 1.5228620  |
| C  | 1.0696820  | 0.2193190  | 0.4471780  |
| C  | 3.4163810  | -0.4461730 | 0.0961730  |
| C  | 4.2303640  | 0.4995710  | -0.5421910 |
| C  | -1.3419890 | 2.3089110  | 0.9091530  |
| C  | 2.4506070  | 0.3893890  | 2.2455150  |
| H  | 3.3806660  | 0.3061850  | 2.7791190  |
| C  | 1.2275510  | 0.8225940  | 2.6324230  |
| H  | 0.8721140  | 1.1956940  | 3.5763470  |
| C  | -0.9932950 | 1.0835860  | 1.4986180  |
| C  | 3.9996240  | 1.9950820  | -0.3959170 |
| H  | 3.1544900  | 2.1434690  | 0.2776180  |
| C  | 2.7047600  | -2.8331460 | 0.6770740  |
| H  | 2.0221830  | -2.2820470 | 1.3256320  |
| C  | 3.5999150  | -1.8290210 | -0.0310530 |
| C  | -0.2759800 | 3.2790160  | 0.4155720  |
| H  | 0.5346730  | 2.6872060  | -0.0166640 |
| C  | -1.9295240 | 0.2072490  | 2.0696830  |
| C  | -2.7015170 | 2.6203030  | 0.8453960  |
| H  | -3.0186870 | 3.5418080  | 0.3774360  |
| C  | 5.2647630  | 0.0161480  | -1.3456780 |
| H  | 5.9113640  | 0.7155410  | -1.8617230 |
| C  | -3.2760510 | 0.5601640  | 1.9648350  |
| H  | -4.0358110 | -0.0958340 | 2.3679160  |
| C  | 4.6433610  | -2.2629830 | -0.8526580 |
| H  | 4.8118130  | -3.3246540 | -0.9855540 |
| C  | 3.6240810  | 2.6340870  | -1.7423210 |
| H  | 4.4518710  | 2.5716080  | -2.4540040 |
| H  | 3.3797270  | 3.6908320  | -1.6028720 |
| H  | 2.7632180  | 2.1298460  | -2.1852940 |
| C  | 5.4663790  | -1.3505770 | -1.5027660 |
| H  | 6.2696810  | -1.7068930 | -2.1371200 |
| C  | -1.4918600 | -1.0657650 | 2.7854910  |
| H  | -0.5238590 | -0.8619540 | 3.2483670  |

|   |            |            |            |
|---|------------|------------|------------|
| C | -3.6569350 | 1.7472800  | 1.3500060  |
| H | -4.7083500 | 1.9939250  | 1.2636900  |
| C | -0.7624600 | 4.2479540  | -0.6676780 |
| H | -1.2302300 | 3.7212250  | -1.4980380 |
| H | 0.0874230  | 4.8167730  | -1.0525020 |
| H | -1.4808140 | 4.9691850  | -0.2681140 |
| C | 1.8479490  | -3.6184370 | -0.3274440 |
| H | 1.2075600  | -2.9541590 | -0.9096470 |
| H | 1.2009200  | -4.3257630 | 0.1977510  |
| H | 2.4755400  | -4.1823090 | -1.0226330 |
| C | 5.2146600  | 2.6897490  | 0.2381230  |
| H | 5.4551740  | 2.2525740  | 1.2104740  |
| H | 5.0090990  | 3.7537510  | 0.3822950  |
| H | 6.0989470  | 2.6026450  | -0.3986890 |
| C | -1.2844080 | -2.2328430 | 1.8097930  |
| H | -2.2327420 | -2.5353920 | 1.3616940  |
| H | -0.8713210 | -3.0960080 | 2.3390160  |
| H | -0.6019810 | -1.9691590 | 1.0036710  |
| C | 0.3085710  | 4.0729660  | 1.5999280  |
| H | -0.4703860 | 4.6823240  | 2.0670920  |
| H | 1.1016370  | 4.7410170  | 1.2529790  |
| H | 0.7303260  | 3.4187780  | 2.3634850  |
| C | 3.5198520  | -3.7774130 | 1.5748160  |
| H | 4.1958780  | -4.4052390 | 0.9883800  |
| H | 2.8497700  | -4.4384660 | 2.1305640  |
| H | 4.1210370  | -3.2155560 | 2.2939420  |
| C | -2.4444670 | -1.4749350 | 3.9160950  |
| H | -2.6259420 | -0.6501440 | 4.6094080  |
| H | -2.0095440 | -2.3049930 | 4.4779330  |
| H | -3.4087230 | -1.8145550 | 3.5296600  |
| C | -1.6638320 | -0.5522240 | -1.6332250 |
| C | -2.5820150 | 0.4652640  | -1.7650000 |
| C | -2.1940900 | -1.7870360 | -1.3328930 |
| C | -3.9447090 | 0.3122080  | -1.5594510 |
| C | -3.5442410 | -2.0092370 | -1.1013580 |
| C | -4.4252610 | -0.9413670 | -1.2083230 |
| F | -2.1535940 | 1.7179630  | -2.1017380 |
| F | -4.8000840 | 1.3489390  | -1.6541790 |
| F | -5.7352560 | -1.1183300 | -0.9650720 |
| F | -4.0121410 | -3.2225160 | -0.7431620 |
| F | -1.3699990 | -2.8702400 | -1.2136670 |

H 1.4866590 0.0759620 -2.9109190

**HBCF-B3LYPD3BJ**

B 0.0433020 -0.0692580 -0.8943780  
C -0.1626980 1.4692680 -0.3699310  
C 1.5033060 -0.6897100 -0.5070740  
C -1.0933240 2.2825580 -1.0109020  
C -1.3575050 3.5939350 -0.6395090  
C -0.6720910 4.1468850 0.4317800  
C 0.2588640 3.3749490 1.1086350  
C 0.4888360 2.0657770 0.7032700  
C 2.6487170 -0.0246880 -0.9418750  
C 3.9406470 -0.4705880 -0.7131820  
C 4.1364270 -1.6544550 -0.0163250  
C 3.0324440 -2.3595470 0.4311200  
C 1.7535080 -1.8718310 0.1794860  
C -1.6371600 -0.9808290 0.9475670  
C -1.2367030 -0.9449270 -0.3836550  
C -2.0424010 -1.6639770 -1.2574130  
C -3.1735250 -2.3649520 -0.8522220  
C -3.5341890 -2.3634380 0.4854210  
C -2.7549840 -1.6659290 1.3981140  
F 0.9229140 3.9012800 2.1551750  
F -0.9107020 5.4138100 0.8111690  
F -2.2675710 4.3341420 -1.3005480  
F -1.8054060 1.8030240 -2.0567260  
F 1.4004990 1.3787950 1.4281820  
F 5.0047070 0.2251050 -1.1561540  
F 5.3791430 -2.1091660 0.2178310  
F 3.2081480 -3.5112150 1.1062410  
F 0.7410400 -2.6358640 0.6547150  
F 2.5307400 1.1374500 -1.6260640  
F -0.9021010 -0.3430930 1.8873050  
F -3.0923380 -1.6703920 2.7015060  
F -4.6235220 -3.0341060 0.8965660  
F -3.9227210 -3.0442140 -1.7413790  
F -1.7530730 -1.7225460 -2.5764960  
H 0.0066800 -0.0318220 -2.0998400

**DIPPZnH-HBCat-B3PW91**

|    |            |            |            |
|----|------------|------------|------------|
| C  | -4.5402180 | 1.7743630  | 0.3075510  |
| C  | -4.3097900 | 2.7455120  | -0.6076340 |
| C  | -2.5289360 | 1.3616460  | -0.6222240 |
| C  | -3.3373860 | -0.2454170 | 1.1055800  |
| C  | -2.4846300 | 3.2764200  | -2.2137090 |
| C  | -2.7647870 | 2.9414520  | -3.5493960 |
| C  | -2.2033580 | 3.7480170  | -4.5405170 |
| C  | -1.4085140 | 4.8377770  | -4.2150920 |
| C  | -1.1581070 | 5.1483830  | -2.8861730 |
| C  | -1.6921940 | 4.3780680  | -1.8516250 |
| C  | -3.9147490 | -1.4370120 | 0.6360420  |
| C  | -3.8478640 | -2.5527280 | 1.4729240  |
| C  | -3.2379170 | -2.4808830 | 2.7167270  |
| C  | -2.6887310 | -1.2849590 | 3.1582420  |
| C  | -2.7343630 | -0.1338390 | 2.3695270  |
| C  | -2.2118170 | 1.1825930  | 2.9188050  |
| C  | -4.6169160 | -1.5480280 | -0.7071610 |
| C  | -3.9555540 | -2.5962260 | -1.6100580 |
| C  | -6.1108790 | -1.8468260 | -0.5224390 |
| C  | -1.4232520 | 4.7648960  | -0.4078310 |
| C  | 0.0781460  | 4.8412260  | -0.1063050 |
| C  | -2.1196860 | 6.0873230  | -0.0568310 |
| C  | -3.6583040 | 1.7775480  | -3.9422960 |
| C  | -4.9757140 | 2.2814190  | -4.5483180 |
| C  | -2.9526240 | 0.8073650  | -4.8973360 |
| C  | -3.1709430 | 1.7341350  | 3.9843230  |
| C  | -0.7897920 | 1.0675640  | 3.4783710  |
| Zn | -0.6471400 | 0.6026670  | -1.2324050 |
| C  | 1.9230910  | -2.2449400 | 1.6220010  |
| C  | 1.6631120  | -1.0209320 | 1.0199510  |
| C  | 2.5682580  | 0.0193720  | 1.0488040  |
| C  | 3.7685190  | -0.2232180 | 1.7230490  |
| C  | 4.0291200  | -1.4513480 | 2.3313220  |
| C  | 3.1027250  | -2.4961310 | 2.2918740  |
| H  | -5.3777340 | 1.6022510  | 0.9621450  |
| H  | -4.9043430 | 3.5912350  | -0.9088560 |
| H  | -2.3959690 | 3.5208480  | -5.5832720 |
| H  | -0.9843590 | 5.4513390  | -5.0027200 |
| H  | -0.5399840 | 6.0064830  | -2.6461780 |
| H  | -4.2824960 | -3.4909730 | 1.1455320  |
| H  | -3.1966740 | -3.3602840 | 3.3505180  |

|   |            |            |            |
|---|------------|------------|------------|
| H | -2.2325300 | -1.2397030 | 4.1409040  |
| H | -2.1815840 | 1.9048040  | 2.0984060  |
| H | -4.5384810 | -0.5842680 | -1.2172430 |
| H | -4.4530760 | -2.6227970 | -2.5835200 |
| H | -2.8981300 | -2.3740900 | -1.7768470 |
| H | -4.0218780 | -3.5981190 | -1.1771330 |
| H | -6.6149720 | -1.8672090 | -1.4928090 |
| H | -6.5975290 | -1.0896080 | 0.0977730  |
| H | -6.2641430 | -2.8193980 | -0.0458990 |
| H | -1.8468370 | 3.9908570  | 0.2376690  |
| H | 0.2381730  | 5.0460400  | 0.9559960  |
| H | 0.5874000  | 3.9066900  | -0.3549990 |
| H | 0.5619190  | 5.6421310  | -0.6721930 |
| H | -1.9596330 | 6.3319560  | 0.9970710  |
| H | -3.1970920 | 6.0340960  | -0.2337780 |
| H | -1.7230120 | 6.9120900  | -0.6560660 |
| H | -3.9092540 | 1.2177370  | -3.0372920 |
| H | -5.6322180 | 1.4382870  | -4.7818120 |
| H | -5.5059800 | 2.9448270  | -3.8600900 |
| H | -4.7969210 | 2.8335930  | -5.4756920 |
| H | -3.5975750 | -0.0513620 | -5.1035970 |
| H | -2.0147730 | 0.4356450  | -4.4761880 |
| H | -2.7214740 | 1.2814730  | -5.8552120 |
| H | -2.8210240 | 2.7064340  | 4.3428740  |
| H | -4.1829410 | 1.8609510  | 3.5912860  |
| H | -3.2273380 | 1.0588300  | 4.8432860  |
| H | -0.7505800 | 0.4199950  | 4.3586750  |
| H | -0.4290000 | 2.0534860  | 3.7845710  |
| H | -0.0952220 | 0.6660650  | 2.7370190  |
| H | 0.6565670  | 0.5725690  | -2.1833660 |
| H | 2.3722350  | 0.9713880  | 0.5726880  |
| H | 4.5125020  | 0.5636450  | 1.7702290  |
| H | 4.9719070  | -1.6012350 | 2.8448760  |
| H | 3.2942700  | -3.4548080 | 2.7579820  |
| H | -1.1022040 | -2.7690660 | 0.3255340  |
| N | -3.4419300 | 0.9367800  | 0.2832630  |
| N | -3.0765990 | 2.4764600  | -1.1659760 |
| B | -0.0634950 | -2.3629490 | 0.7022040  |
| O | 0.4038730  | -1.0767950 | 0.4406860  |
| O | 0.8512070  | -3.0872100 | 1.4262540  |



**HBCat-B3PW91**

|   |            |            |            |
|---|------------|------------|------------|
| C | -0.2713900 | 0.6954550  | 0.0000340  |
| C | -0.2713910 | -0.6954550 | -0.0000970 |
| C | 0.8978170  | -1.4288730 | -0.0000290 |
| C | 2.0894620  | -0.6979490 | 0.0001760  |
| C | 2.0894630  | 0.6979490  | 0.0003060  |
| C | 0.8978170  | 1.4288730  | 0.0002390  |
| H | 0.8858900  | -2.5121820 | -0.0001260 |
| H | 3.0343310  | -1.2299030 | 0.0002380  |
| H | 3.0343310  | 1.2299030  | 0.0004660  |
| H | 0.8858900  | 2.5121820  | 0.0003400  |
| B | -2.3486670 | 0.0000000  | -0.0003000 |
| H | -3.5294400 | 0.0000000  | -0.0004080 |
| O | -1.5723960 | 1.1428770  | -0.0000710 |
| O | -1.5723960 | -1.1428770 | -0.0002780 |

**DIPPZnH-HBPin-B3PW91**

|    |            |            |            |
|----|------------|------------|------------|
| Zn | 2.5039470  | 6.0843190  | 9.3440170  |
| N  | 3.3590320  | 7.3809710  | 6.6562620  |
| N  | 2.6639610  | 8.9365180  | 7.9605510  |
| C  | 2.7515780  | 7.5902960  | 7.8500250  |
| C  | 3.6803730  | 6.0832870  | 6.1080670  |
| C  | 2.8433250  | 5.5551140  | 5.1118020  |
| C  | 0.7903690  | 10.1090750 | 9.0144170  |
| C  | 3.6437360  | 8.5786040  | 6.0290120  |
| H  | 4.1244980  | 8.6250870  | 5.0667050  |
| C  | 3.2056440  | 9.5601680  | 6.8520500  |
| H  | 3.2333810  | 10.6318230 | 6.7522300  |
| C  | 2.1166630  | 9.6496250  | 9.0898690  |
| C  | 1.6296260  | 6.2913570  | 4.5703860  |
| H  | 1.4725340  | 7.1866410  | 5.1772040  |
| C  | 5.8071340  | 6.0632130  | 7.5441000  |
| H  | 5.2452800  | 6.7757870  | 8.1562390  |
| C  | 4.8397160  | 5.4245010  | 6.5610060  |
| C  | -0.0796250 | 9.9074700  | 7.7849720  |
| H  | 0.3828580  | 9.1324010  | 7.1674160  |
| C  | 2.9523450  | 9.9050540  | 10.1908510 |
| C  | 0.2974770  | 10.8209900 | 10.1093870 |
| H  | -0.7211430 | 11.1914510 | 10.0897930 |
| C  | 3.1818920  | 4.3063920  | 4.5861700  |

|   |            |            |            |
|---|------------|------------|------------|
| H | 2.5582110  | 3.8675570  | 3.8153140  |
| C | 2.4028350  | 10.6191660 | 11.2574800 |
| H | 3.0152420  | 10.8350560 | 12.1254850 |
| C | 5.1202350  | 4.1753830  | 6.0057220  |
| H | 5.9996110  | 3.6334270  | 6.3323070  |
| C | 0.3532950  | 5.4480040  | 4.6656900  |
| H | 0.4101340  | 4.5552110  | 4.0367230  |
| H | -0.5076220 | 6.0325170  | 4.3290930  |
| H | 0.1651050  | 5.1257860  | 5.6920330  |
| C | 4.3006720  | 3.6200450  | 5.0320130  |
| H | 4.5423640  | 2.6490260  | 4.6130850  |
| C | 4.4156860  | 9.4976020  | 10.2244870 |
| H | 4.5814480  | 8.7620990  | 9.4322890  |
| C | 1.0909010  | 11.0686560 | 11.2205660 |
| H | 0.6866210  | 11.6241790 | 12.0601020 |
| C | -1.4942360 | 9.4310860  | 8.1300250  |
| H | -1.4781970 | 8.5338160  | 8.7530630  |
| H | -2.0417420 | 9.1981120  | 7.2125910  |
| H | -2.0639950 | 10.1982720 | 8.6612550  |
| C | 6.4590680  | 5.0612360  | 8.5012070  |
| H | 5.7198340  | 4.4445450  | 9.0184000  |
| H | 7.0367560  | 5.5989700  | 9.2574910  |
| H | 7.1529530  | 4.3945720  | 7.9814440  |
| C | 1.8727080  | 6.7494120  | 3.1250000  |
| H | 2.7615900  | 7.3805180  | 3.0431660  |
| H | 1.0150910  | 7.3219340  | 2.7603040  |
| H | 2.0104830  | 5.8918250  | 2.4597530  |
| C | 4.8219680  | 8.8400290  | 11.5476920 |
| H | 4.7686710  | 9.5427370  | 12.3838470 |
| H | 5.8559830  | 8.4900350  | 11.4846090 |
| H | 4.1898630  | 7.9805170  | 11.7859710 |
| C | -0.1388840 | 11.1961460 | 6.9503510  |
| H | -0.6051400 | 12.0055340 | 7.5200110  |
| H | -0.7318310 | 11.0349510 | 6.0455580  |
| H | 0.8556900  | 11.5321790 | 6.6471930  |
| C | 6.8863000  | 6.8498180  | 6.7830570  |
| H | 7.4859160  | 6.1741300  | 6.1656330  |
| H | 7.5577400  | 7.3516570  | 7.4857550  |
| H | 6.4531970  | 7.6087430  | 6.1271520  |
| C | 5.3103190  | 10.7094520 | 9.9231240  |
| H | 5.0668520  | 11.1608390 | 8.9578570  |

|   |            |            |            |
|---|------------|------------|------------|
| H | 6.3618780  | 10.4092260 | 9.9022670  |
| H | 5.1940340  | 11.4782780 | 10.6928950 |
| H | 3.1632580  | 5.4218070  | 10.6692830 |
| C | -0.7037700 | 4.6897680  | 9.5001160  |
| C | -0.9063320 | 3.1868170  | 9.8920340  |
| O | 0.6665600  | 4.6642350  | 8.9301040  |
| O | -0.0528880 | 2.4951650  | 8.9245820  |
| B | 0.8925010  | 3.3641350  | 8.5121570  |
| H | 1.8362700  | 3.0667530  | 7.8584500  |
| C | -0.3606230 | 2.8409730  | 11.2730700 |
| H | -0.9891950 | 3.2569650  | 12.0635850 |
| H | -0.3466950 | 1.7547000  | 11.3836370 |
| H | 0.6595480  | 3.2095360  | 11.4060210 |
| C | -2.3261100 | 2.6742870  | 9.7314480  |
| H | -3.0077700 | 3.2187530  | 10.3901220 |
| H | -2.6785020 | 2.7695950  | 8.7042590  |
| H | -2.3617280 | 1.6183900  | 10.0077960 |
| C | -1.6219560 | 5.1439460  | 8.3739690  |
| H | -1.2907980 | 6.1166960  | 8.0053620  |
| H | -1.6121960 | 4.4399690  | 7.5392370  |
| H | -2.6501010 | 5.2459340  | 8.7273440  |
| C | -0.7430920 | 5.6657220  | 10.6585160 |
| H | -1.7311650 | 5.6501150  | 11.1259560 |
| H | 0.0006990  | 5.4328920  | 11.4205800 |
| H | -0.5715730 | 6.6831210  | 10.2980640 |

#### **HBPIn-B3PW91**

|   |            |            |            |
|---|------------|------------|------------|
| C | -0.7843830 | -0.1908260 | -0.0480530 |
| C | 0.7844240  | -0.1907320 | 0.0480570  |
| B | -0.0001120 | 1.9406030  | -0.0000290 |
| H | -0.0001690 | 3.1299830  | -0.0001030 |
| C | -1.4723370 | -0.4639680 | 1.2863100  |
| H | -2.5394360 | -0.2536630 | 1.1830620  |
| H | -1.3553340 | -1.5070040 | 1.5898950  |
| H | -1.0752520 | 0.1762600  | 2.0777140  |
| C | 1.3627630  | -1.0819600 | 1.1337540  |
| H | 1.1145850  | -2.1303130 | 0.9458540  |
| H | 2.4514590  | -0.9888660 | 1.1397030  |
| H | 0.9924170  | -0.8068210 | 2.1218760  |
| C | 1.4723990  | -0.4638810 | -1.2862930 |
| H | 2.5394720  | -0.2534390 | -1.1830690 |

|   |            |            |            |
|---|------------|------------|------------|
| H | 1.3555210  | -1.5069520 | -1.5898070 |
| H | 1.0752270  | 0.1762450  | -2.0777370 |
| C | -1.3626120 | -1.0821840 | -1.1337010 |
| H | -1.1143250 | -2.1305000 | -0.9457330 |
| H | -2.4513180 | -0.9892060 | -1.1396700 |
| H | -0.9922830 | -0.8070670 | -2.1218350 |
| O | 1.0759540  | 1.1994170  | 0.3861650  |
| O | -1.0760670 | 1.1992690  | -0.3862470 |

Optimised structures of O-bound CatBH-[IDippZnH]<sup>+</sup> (left) and PinBH-[IDippZnH]<sup>+</sup> (right) at the B3PW91/6-311G(d,p)/lanl2dz(Zn)/PCM (PhCl) level.

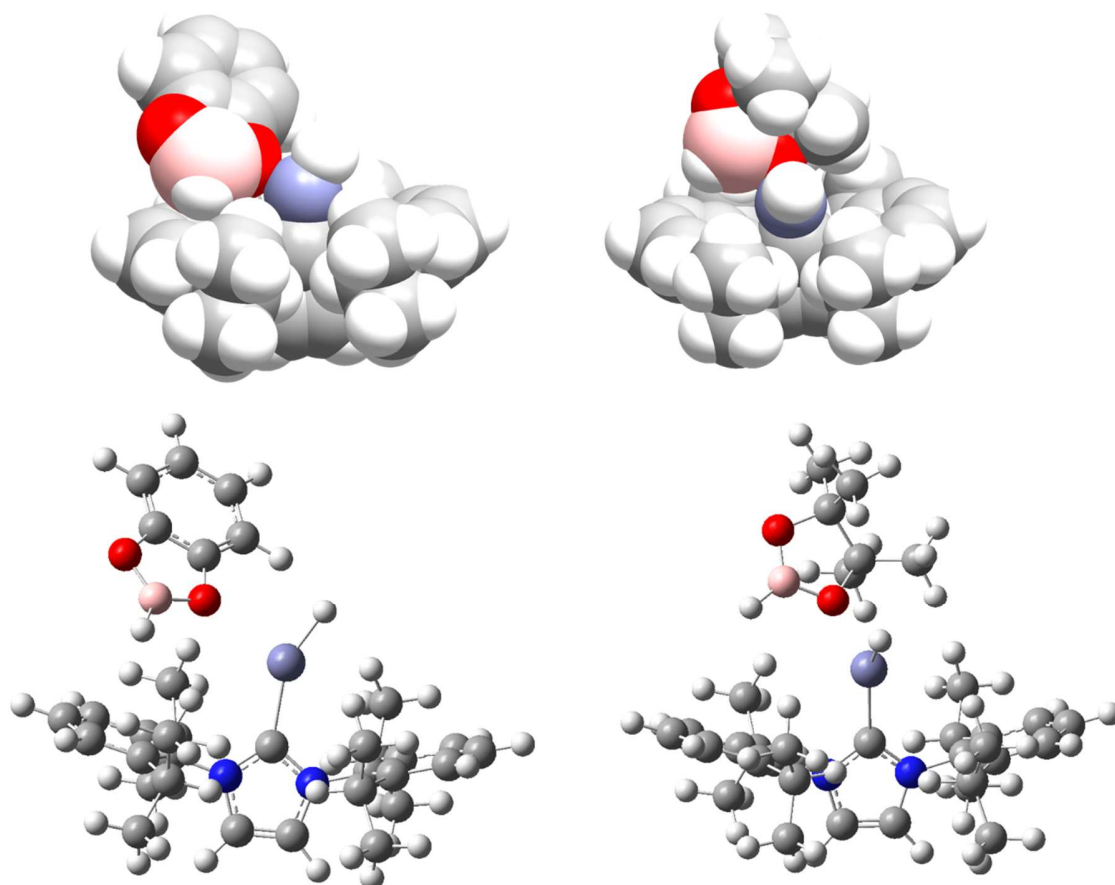

**Figure S75:** Top space filling diagram at 100% van der Waals radii of O-bound adducts.

## S15. Copies of NMR for new Zinc compounds

### S15.1 7DippZnEt<sub>2</sub>

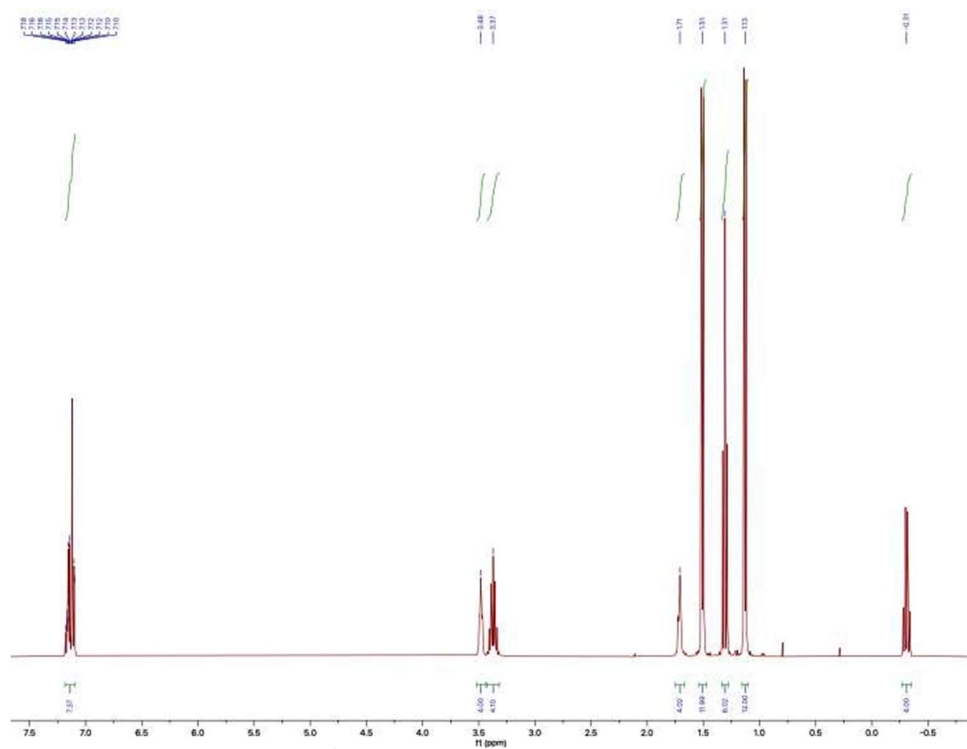

Figure S76: <sup>1</sup>H NMR spectrum of 7DippZnEt<sub>2</sub> in C<sub>6</sub>D<sub>6</sub>.

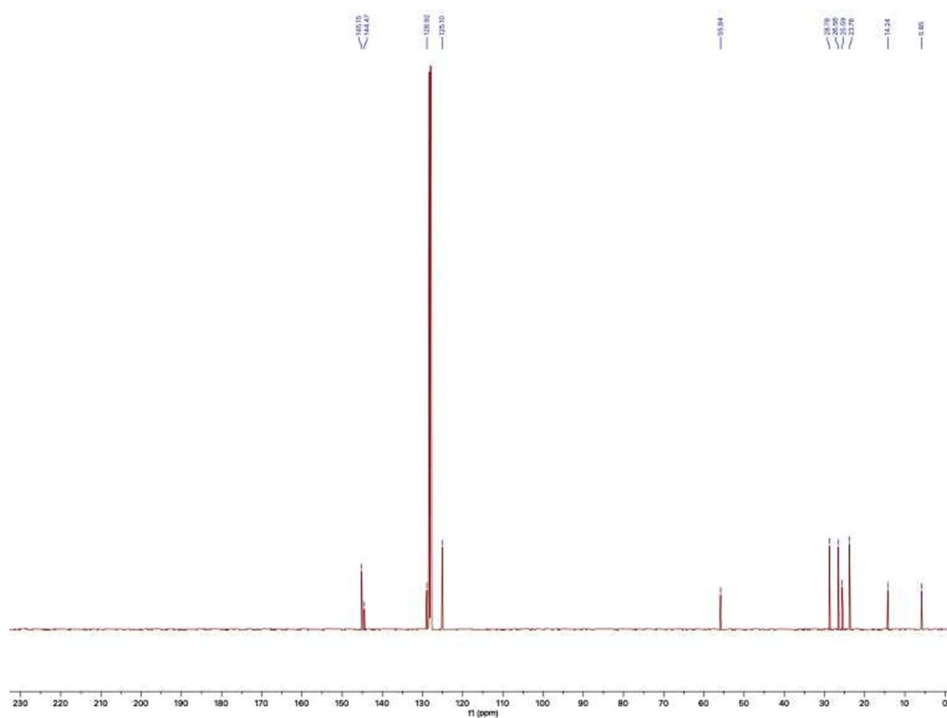

Figure S77: <sup>13</sup>C{<sup>1</sup>H} NMR spectrum of 7DippZnEt<sub>2</sub> in C<sub>6</sub>D<sub>6</sub>.

S15.2 [7DippZnEt][B(C<sub>6</sub>F<sub>5</sub>)<sub>4</sub>] (4)

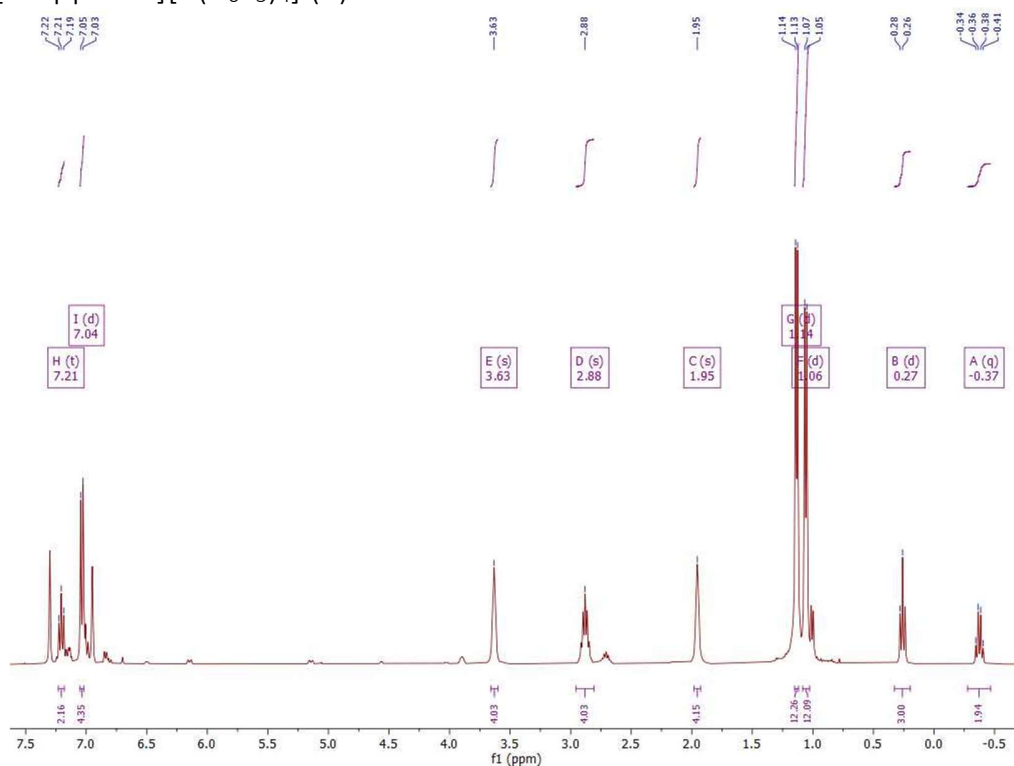

Figure S78: <sup>1</sup>H NMR spectrum of **4** in C<sub>6</sub>D<sub>5</sub>Br.

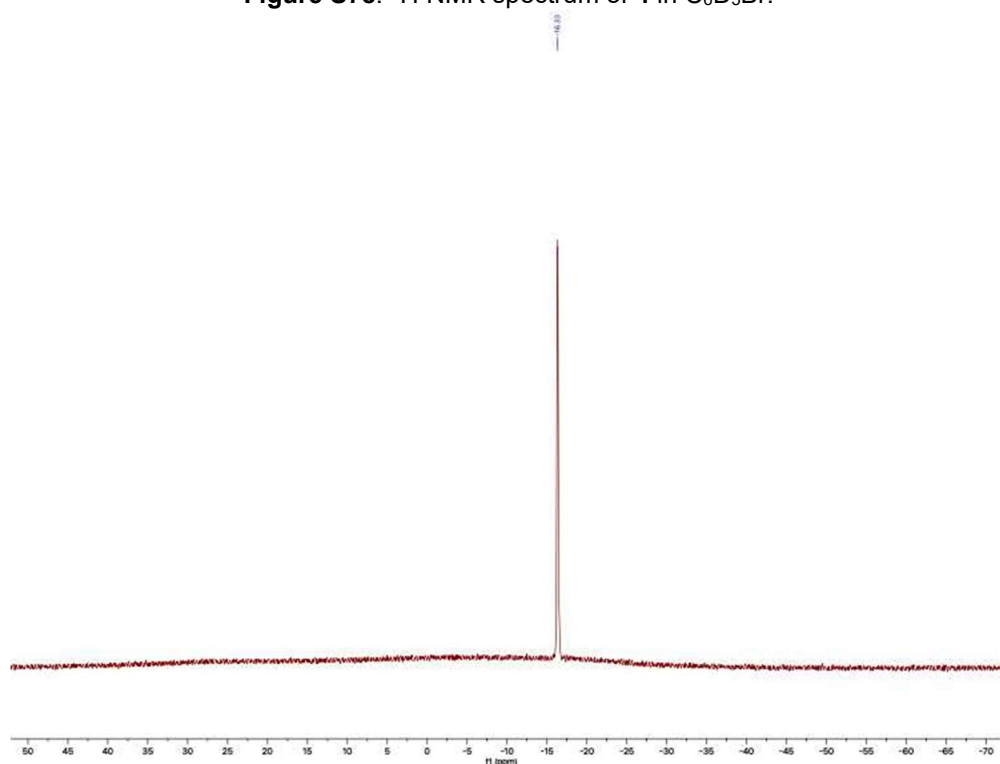

Figure S79: <sup>11</sup>B NMR spectrum of **4** in PhCl.





## S16. References

1. E. Ihara, V. G. Young and R. F. Jordan, *J. Am. Chem. Soc.*, 1998, **120**, 8277-8278.
2. A. J. Arduengo, R. Krafczyk, R. Schmutzler, H. A. Craig, J. R. Goerlich, W. J. Marshall and M. Unverzagt, *Tetrahedron*, 1999, **55**, 14523-14534.
3. M. Iglesias, D. Beetstra, J. Knight, L.-L. Ooi, A. Stasch, S. Coles, L. Male, M. Hursthouse, K. Cavell, A. Dervisi and I. Fallis, *Organometallics*, 2008, **27**, 3279-3289.
4. R. J. Procter, M. Uzelac, J. Cid, P. J. Rushworth and M. J. Ingleson, *ACS. Catal.*, 2019, **9**, 5760-5771.
5. T. R. Jensen, C. P. Schaller, M. A. Hillmyer and W. B. Tolman, *J. Organomet. Chem.*, 2005, **690**, 5881-5891.
6. D. Specklin, F. Hild, C. Fliedel, C. Gourlaouen, L. F. Veiros and S. Dagorne, *Chem. Eur. J.*, 2017, **23**, 15908-15912.
7. H. Huo, C. Fu, K. Harms, E. Meggers., *J. Am. Chem. Soc.*, 2014, **136**, 8, 2990-2993.
8. K. Nemoto, S. Tanaka, M. Konno, S. Onozawa, M. Chiba, Y. Tanaka, Y. Sasaki, R. Okubo, T. Hattori, *Tetrahedron*, 2016, **72**, 5, 734-745.
9. L. Salvi, N.R. Davis, S.Z. Ali, S.L. Buchwald, *Org. Lett.*, **14**, 1, 170-173.
10. T-H. Ding, J-P. Qu, Y-B. Kang, *Org. Lett.*, 2020, **22**, 6, 3084-3088.
11. E. Rochette, V. Desroisiers, Y. Yashar, F-G. Fontaine., *J. Am. Chem. Soc.*, 2019, **141**, 31, 12305-12311.
12. Y-L. Liu, G. Kehr, C.G. Daniliuc, G. Erker, *Chem. Eur. J.*, 2017, **23**, 12141-12144.
13. S. Tanaka, S. Yuki, Y. Tanaka, T. Hattori, *Org. Lett.*, 2018, **20**, 7, 1828-1831.
14. V. Bagutski, A. Del Grosso, J. A. Carrillo, I. A. Cade, M. D. Helm, J. R. Lawson, P. J. Singleton, S. A. Solomon, T. Marcelli, M. J. Ingleson, *J. Am. Chem. Soc.*, 2013, **135**, 1, 474-487.
15. H. Ochiai, Y. Uetake, T. Niwa, T. Hosoya, *Angew. Chemie. Int. Ed.*, 2017, **40**, 3, 2333-2342.
16. S. Wurtemberger-Pietsch, H. Schneider, T. B. Marder, U. Radius, *Chem. Eur. J.*, 2016, **22**, 13032-13036.
17. D. C. H. Do, S. Muthaiah, R. Ganguly, D. Vidovic, *Organometallics*, 2014, **33**, 16, 4165-4168.
18. G. C. Welch, L. Cabrera, P. A. Chase, E. Hollink, J. D. Masuda, P. Wei and D. W. Stephan, *Dalton Trans.*, 2007, 3407-3414.
19. U. Mayer, V. Gutmann and W. Gerger, *Monatsh. Chem.*, 1975, **106**, 1235-1257.
20. M. A. Beckett, G. C. Strickland, J. R. Holland and K. Sukumar Varma, *Polymer*, 1996, **37**, 4629-4631.
21. O. V. Dolomanov, L. J. Bourhis, R. J. Gildea, J. A. K. Howard and H. Puschmann, *J. Appl. Crystallogr.*, 2009, **42**, 339-341.
22. G. Sheldrick, *Acta Crystallog A*, 2015, **71**, 3-8.
23. G. Sheldrick, *Acta Crystallogr. A*, 2008, **64**, 112-122.
24. Gaussian 09, Revision C1, Frisch, M. J., Trucks, G. W., Schlegel, H. B., Scuseria, G. E., Robb, M. A., Cheeseman, J. R., Scalmani, G., Barone, V., Mennucci, B., Petersson, G. A., Nakatsuji, H., Caricato, M., Li, X., Hratchian, H. P., Izmaylov, A. F., Bloino, J., Zheng, G., Sonnenberg, J. L., Hada, M., Ehara, M., Toyota, K., Fukuda, R., Hasegawa, J., Ishida, M., Nakajima, T., Honda, Y., Kitao, O., Nakai, H., Vreven, T., Montgomery, Jr., J. A., Peralta, J. E., Ogliaro, F., Bearpark, M., Heyd, J. J.,

- Brothers, E., Kudin, K.N., Staroverov, V. N., Kobayashi, R., Normand, J., Raghavachari, K., Rendell, A.,Burant, J. C., Iyengar, S. S., Tomasi, J., Cossi, M., Rega, N., Millam, J. M., Klene, M.,Knox, J. E., Cross, J. B., Bakken, V., Adamo, C., Jaramillo, J., Gomperts, R.,Stratmann, R. E., Yazyev, O., Austin, A. J., Cammi, R., Pomelli, C., Ochterski, J. W.,Martin, R. L., Morokuma, K., Zakrzewski, V. G., Voth, G. A., Salvador, P., Dannenberg,J. J., Dapprich, S., Daniels, A. D., Farkas, Ö., Foresman, J. B., Ortiz, J. V., Cioslowski,J., Fox, D. J. Gaussian, Inc., Wallingford CT, 2009.
25. (a) Becke, A. D. *J. Chem. Phys.* 1993, **98**, 5648-5652, (b) Burke, K, Perdew, J. P. , Yang, W. *Electronic Density Functional Theory: Recent Progress and New Directions*, (Ed: J. F. Dobson, G. Vignale, M. P. Das), Springer, Heidelberg, **1998**.
  26. Zhao, Y., Truhlar, D. G. *Theor. Chem. Acc.* **2008**, *120*, 215-241.
  27. Lee, C., Yang, W., Parr, R.G. *Phys. Rev. B* 1988, *37*, 785-789.
  28. Grimme, S., Ehrlich, S., Goerigk, L. *J. Comput. Chem.* **2011**, *32*, 1456– 1465
  29. Mennucci B., Cancès E., Tomasi J., *J. Phys. Chem. B* **1997**, *101*, 10506-10517.
